# Supplementary material for: Regioselective synthesis of 9,10-dihydro-6H-chromeno[4,3-d]imidazo-[1,2-a]pyridin-6-one derivatives
Source: Royal Society of Chemistry journal article supplement (doi:10.1039/c3ra46428h), 2013-12-18
Supplement: c3ra46428h.pdf [file c3ra46428h.pdf]

# Regioselective Synthesis of 9,10-Dihydro-6*H*-chromeno[4,3-*d*]imidazo -[1,2-*a*]pyridin-6-one Derivatives†

Fuchao Yu<sup>a,b</sup>, Zhiqiong Chen<sup>a</sup>, Xiaopan Hao<sup>a</sup>, Xiuyang Jiang<sup>a</sup>, Shengjiao Yan<sup>a\*</sup> and Jun Lin<sup>a\*</sup>

<sup>a</sup>Key Laboratory of Medicinal Chemistry for Natural Resource (Yunnan University), Ministry of Education, School of Chemical Science and Technology, Yunnan University, Kunming, 650091, P. R. China

<sup>b</sup>Faculty of Life Science and Technology, Kunming University of Science and Technology, Kunming, 650504, P. R. China.

## Supporting Information

### Table of Contents

|                                                                                                                                                                   |    |
|-------------------------------------------------------------------------------------------------------------------------------------------------------------------|----|
| General Information.....                                                                                                                                          | 3  |
| General Procedure for Regioselective Synthesis of 9,10-Dihydro-6 <i>H</i> -chromeno-<br>[4,3- <i>d</i> ]imidazo[1,2- <i>a</i> ]pyridin-6-ones <b>4</b> .....      | 3  |
| Spectroscopic Data of 9,10-Dihydro-6 <i>H</i> -chromeno[4,3- <i>d</i> ]imidazo[1,2- <i>a</i> ]pyridin-6-<br>-ones <b>4</b> .....                                  | 4  |
| X-ray Structure and Data of <b>4d</b> .....                                                                                                                       | 12 |
| <sup>1</sup> H NMR and <sup>13</sup> C NMR Spectra for 9,10-dihydro-6 <i>H</i> -chromeno[4,3- <i>d</i> ]imidazo[1,2- <i>a</i> ]-<br>pyridin-6-ones <b>4</b> ..... | 16 |
| <b>Figure 1.</b> <sup>1</sup> H NMR (500 MHz, DMSO- <i>d</i> <sub>6</sub> +CDCl <sub>3</sub> ) spectra of compound <b>4a</b> .....                                | 16 |
| <b>Figure 2.</b> <sup>13</sup> C NMR (125 MHz, DMSO- <i>d</i> <sub>6</sub> +CDCl <sub>3</sub> ) spectra of compound <b>4a</b> .....                               | 17 |
| <b>Figure 3.</b> <sup>1</sup> H NMR (500 MHz, DMSO- <i>d</i> <sub>6</sub> +CDCl <sub>3</sub> ) spectra of compound <b>4b</b> .....                                | 18 |
| <b>Figure 4.</b> <sup>13</sup> C NMR (125 MHz, DMSO- <i>d</i> <sub>6</sub> +CDCl <sub>3</sub> ) spectra of compound <b>4b</b> .....                               | 19 |
| <b>Figure 5.</b> <sup>1</sup> H NMR (500 MHz, DMSO- <i>d</i> <sub>6</sub> +CDCl <sub>3</sub> ) spectra of compound <b>4c</b> .....                                | 20 |
| <b>Figure 6.</b> <sup>13</sup> C NMR (125 MHz, DMSO- <i>d</i> <sub>6</sub> +CDCl <sub>3</sub> ) spectra of compound <b>4c</b> .....                               | 21 |
| <b>Figure 7.</b> <sup>1</sup> H NMR (500 MHz, DMSO- <i>d</i> <sub>6</sub> ) spectra of compound <b>4d</b> .....                                                   | 22 |
| <b>Figure 8.</b> <sup>13</sup> C NMR (125 MHz, DMSO- <i>d</i> <sub>6</sub> ) spectra of compound <b>4d</b> .....                                                  | 23 |
| <b>Figure 9.</b> <sup>1</sup> H NMR (500 MHz, DMSO- <i>d</i> <sub>6</sub> ) spectra of compound <b>4e</b> .....                                                   | 24 |

|                                                                                                                       |    |
|-----------------------------------------------------------------------------------------------------------------------|----|
| <b>Figure 10.</b> $^{13}\text{C}$ NMR (125 MHz, $\text{DMSO-}d_6$ ) spectra of compound <b>4e</b> .....               | 25 |
| <b>Figure 11.</b> $^1\text{H}$ NMR (500 MHz, $\text{DMSO-}d_6$ ) spectra of compound <b>4f</b> .....                  | 26 |
| <b>Figure 12.</b> $^{13}\text{C}$ NMR (125 MHz, $\text{DMSO-}d_6$ ) spectra of compound <b>4f</b> .....               | 27 |
| <b>Figure 13.</b> $^1\text{H}$ NMR (500 MHz, $\text{DMSO-}d_6+\text{CDCl}_3$ ) spectra of compound <b>4g</b> .....    | 28 |
| <b>Figure 14.</b> $^{13}\text{C}$ NMR (125 MHz, $\text{DMSO-}d_6+\text{CDCl}_3$ ) spectra of compound <b>4g</b> ..... | 29 |
| <b>Figure 15.</b> $^1\text{H}$ NMR (500 MHz, $\text{DMSO-}d_6$ ) spectra of compound <b>4h</b> .....                  | 30 |
| <b>Figure 16.</b> $^{13}\text{C}$ NMR (125 MHz, $\text{DMSO-}d_6$ ) spectra of compound <b>4h</b> .....               | 31 |
| <b>Figure 17.</b> $^1\text{H}$ NMR (500 MHz, $\text{DMSO-}d_6$ ) spectra of compound <b>4i</b> .....                  | 32 |
| <b>Figure 18.</b> $^{13}\text{C}$ NMR (125 MHz, $\text{DMSO-}d_6$ ) spectra of compound <b>4i</b> .....               | 33 |
| <b>Figure 19.</b> $^1\text{H}$ NMR (500 MHz, $\text{DMSO-}d_6$ ) spectra of compound <b>4j</b> .....                  | 34 |
| <b>Figure 20.</b> $^{13}\text{C}$ NMR (125 MHz, $\text{DMSO-}d_6$ ) spectra of compound <b>4j</b> .....               | 35 |
| <b>Figure 21.</b> $^1\text{H}$ NMR (500 MHz, $\text{DMSO-}d_6$ ) spectra of compound <b>4k</b> .....                  | 36 |
| <b>Figure 22.</b> $^{13}\text{C}$ NMR (125 MHz, $\text{DMSO-}d_6$ ) spectra of compound <b>4k</b> .....               | 37 |
| <b>Figure 23.</b> $^1\text{H}$ NMR (500 MHz, $\text{DMSO-}d_6$ ) spectra of compound <b>4l</b> .....                  | 38 |
| <b>Figure 24.</b> $^{13}\text{C}$ NMR (125 MHz, $\text{DMSO-}d_6$ ) spectra of compound <b>4l</b> .....               | 39 |
| <b>Figure 25.</b> $^1\text{H}$ NMR (500 MHz, $\text{DMSO-}d_6$ ) spectra of compound <b>4m</b> .....                  | 40 |
| <b>Figure 26.</b> $^{13}\text{C}$ NMR (125 MHz, $\text{DMSO-}d_6$ ) spectra of compound <b>4m</b> .....               | 41 |
| <b>Figure 27.</b> $^1\text{H}$ NMR (500 MHz, $\text{DMSO-}d_6$ ) spectra of compound <b>4n</b> .....                  | 42 |
| <b>Figure 28.</b> $^{13}\text{C}$ NMR (125 MHz, $\text{DMSO-}d_6$ ) spectra of compound <b>4n</b> .....               | 43 |
| <b>Figure 29.</b> $^1\text{H}$ NMR (500 MHz, $\text{DMSO-}d_6$ ) spectra of compound <b>4o</b> .....                  | 44 |
| <b>Figure 30.</b> $^{13}\text{C}$ NMR (125 MHz, $\text{DMSO-}d_6$ ) spectra of compound <b>4o</b> .....               | 45 |
| <b>Figure 31.</b> $^1\text{H}$ NMR (500 MHz, $\text{DMSO-}d_6$ ) spectra of compound <b>4p</b> .....                  | 46 |
| <b>Figure 32.</b> $^{13}\text{C}$ NMR (125 MHz, $\text{DMSO-}d_6$ ) spectra of compound <b>4p</b> .....               | 47 |
| <b>Figure 33.</b> $^1\text{H}$ NMR (500 MHz, $\text{DMSO-}d_6$ ) spectra of compound <b>4q</b> .....                  | 48 |
| <b>Figure 34.</b> $^{13}\text{C}$ NMR (125 MHz, $\text{DMSO-}d_6$ ) spectra of compound <b>4q</b> .....               | 49 |
| <b>References</b> .....                                                                                               | 50 |

## General Information

All compounds were fully characterized by spectroscopic data. The NMR spectra were recorded on a Bruker DRX500 ( $^1\text{H}$ : 500 MHz,  $^{13}\text{C}$ : 125 MHz), chemical shifts ( $\delta$ ) are expressed in ppm, and  $J$  values are given in Hz, and deuterated  $\text{CDCl}_3$  and  $\text{DMSO}-d_6$  were used as solvent. IR spectra were recorded on a FT-IR Thermo Nicolet Avatar 360 using KBr pellet. The reactions were monitored by thin layer chromatography (TLC) using silica gel  $\text{GF}_{254}$ . The melting points were determined on XT-4A melting point apparatus and are uncorrected. HRMs were performed on a Agilent LC/Msd TOF instrument.

All chemicals and solvents were used as received without further purification unless otherwise stated.

The substrates **2** were synthesized according to the literature.<sup>1</sup> Compounds **3** was prepared according to the literature.<sup>2</sup>

## General Procedure for Regioselective Synthesis of 9,10-Dihydro-6H-chromeno-[4,3-d]imidazo[1,2-a]pyridin-6-ones **4**

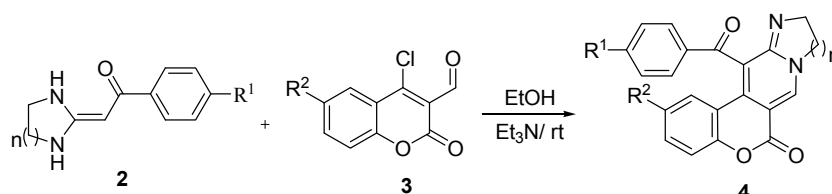

HKA derivatives **2** (0.5 mmol), 4-chloro-2-oxo-2H-chromene-3-carbaldehyde derivatives **3** (0.5 mmol) and ethanol (15 ml) were placed into a 25 mL round-bottom flask and the mixture was stirred at room temperature for 10 minutes. Upon completion, as monitored by TLC, trimethylamine (10 mmol%) was added and the mixture was stirred at room temperature for 5 minutes. Then the reaction mixture was cooled to room temperature and filtered to give the pure crude product, which was further washed with 95% EtOH to give pure product **4** with a yield of 80–96%. The products were further identified by FTIR, NMR and HRMS, and were found to be in good agreement with the assigned structures.

## **Spectroscopic Data of 9,10-Dihydro-6*H*-chromeno[4,3-*d*]imidazo[1,2-*a*]pyridin-6-ones 4**

### **12-(4-Fluorobenzoyl)-9,10-dihydro-6*H*-chromeno[4,3-*d*]imidazo[1,2-*a*]pyridin-6-one (4a)**

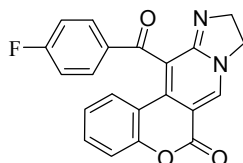

Orange solid; Mp 291–294 °C; IR (KBr): 1719, 1669, 1622, 1511, 1327, 1273, 1224, 1147, 1086, 1004, 751 cm<sup>-1</sup>; <sup>1</sup>H NMR (500 MHz, CDCl<sub>3</sub>): δ = 4.10–4.12 (m, 2H, NCH<sub>2</sub>), 4.25–4.29 (m, 2H, NCH<sub>2</sub>), 6.97–7.00 (m, 1H, ArH), 7.20–7.24 (m, 3H, ArH), 7.41–7.46 (m, 2H, ArH), 8.15–8.18 (m, 2H, ArH), 8.50 (s, 1H, CH); <sup>13</sup>C NMR (125 MHz, DMSO-*d*<sub>6</sub>+CDCl<sub>3</sub>): δ = 49.1, 53.5, 98.8, 115.6, 116.6, 116.8, 118.4, 124.5, 126.9, 132.4, 132.4, 132.4, 132.6, 134.9, 145.9, 152.4, 155.0, 159.3, 165.2, 167.2, 194.1; HRMS (TOF ES<sup>+</sup>): *m/z* calcd for C<sub>21</sub>H<sub>13</sub>FN<sub>2</sub>O<sub>3</sub> [(M+H)<sup>+</sup>], 361.0983; found, 361.0989.

### **12-(4-Chlorobenzoyl)-9,10-dihydro-6*H*-chromeno[4,3-*d*]imidazo[1,2-*a*]pyridin-6-one (4b)**

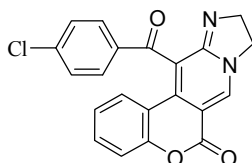

Orange solid; Mp 301–304 °C; IR (KBr): 1719, 1674, 1622, 1523, 1454, 1274, 1213, 1094, 1000, 743 cm<sup>-1</sup>; <sup>1</sup>H NMR (500 MHz, CDCl<sub>3</sub>): δ = 4.10–4.12 (m, 2H, NCH<sub>2</sub>), 4.24–4.28 (m, 2H, NCH<sub>2</sub>), 6.98–7.00 (m, 1H, ArH), 7.23–7.25 (m, 1H, ArH), 7.42–7.45 (m, 2H, ArH), 7.52–7.53 (m, 2H, ArH), 8.07–8.09 (m, 2H, ArH), 8.50 (s, 1H, CH); <sup>13</sup>C NMR (125 MHz, DMSO-*d*<sub>6</sub>+CDCl<sub>3</sub>): δ = 49.2, 53.5, 98.8, 115.4, 115.6, 118.5, 124.6, 126.9, 129.8, 131.2, 132.8, 134.5, 140.0, 146.0, 152.5, 155.0, 159.2, 194.5; HRMS (TOF ES<sup>+</sup>): *m/z* calcd for C<sub>21</sub>H<sub>13</sub>ClN<sub>2</sub>O<sub>3</sub> [(M+H)<sup>+</sup>], 377.0687; found, 377.0689.

### **12-(2-Chlorobenzoyl)-9,10-dihydro-6*H*-chromeno[4,3-*d*]imidazo[1,2-*a*]pyridin-6-one (4c)**

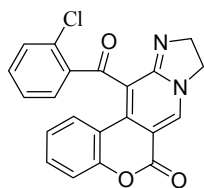

Yellow solid; Mp 256–258 °C; IR (KBr): 1695, 1592, 1504, 1422, 1375, 1282, 1196, 1046, 755  $\text{cm}^{-1}$ ;  $^1\text{H}$  NMR (500 MHz,  $\text{DMSO-}d_6+\text{CDCl}_3$ ):  $\delta$  = 4.03–4.07 (m, 2H,  $\text{CH}_2$ ), 4.84–4.88 (m, 2H,  $\text{CH}_2$ ), 7.13–7.16 (m, 1H, ArH), 7.26–7.29 (m, 1H, ArH), 7.34–7.36 (d,  $J$  = 8.15 Hz, 1H, ArH), 7.47–7.49 (d,  $J$  = 8.05 Hz, 1H, ArH), 7.54–7.62 (m, 2H, ArH), 7.78–7.79 (d,  $J$  = 7.75 Hz, 1H, ArH), 8.17 (s, 1H, CH);  $^{13}\text{C}$  NMR (125 MHz,  $\text{DMSO-}d_6+\text{CDCl}_3$ ):  $\delta$  = 44.7, 51.5, 97.8, 112.1, 114.2, 118.7, 124.6, 127.8, 128.9, 132.1, 133.9, 134.2, 135.4, 135.6, 146.2, 153.1, 155.1, 157.6, 162.7, 194.5; HRMS (TOF  $\text{ES}^+$ ):  $m/z$  calcd for  $\text{C}_{21}\text{H}_{13}\text{ClN}_2\text{O}_3$  [(M+H) $^+$ ], 377.0687; found, 377.0681.

#### 12-Benzoyl-9,10-dihydro-6H-chromeno[4,3-d]imidazo[1,2-a]pyridin-6-one (4d)

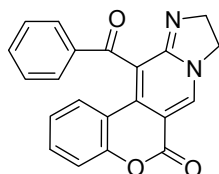

Orange solid; Mp 272–275 °C; IR (KBr): 1719, 1669, 1617, 1521, 1450, 1327, 1273, 1216, 1145, 1104, 743  $\text{cm}^{-1}$ ;  $^1\text{H}$  NMR (500 MHz,  $\text{DMSO-}d_6$ ):  $\delta$  = 3.77–3.79 (m, 2H,  $\text{NCH}_2$ ), 4.17–4.21 (m, 2H,  $\text{NCH}_2$ ), 7.01 (m, 1H, ArH), 7.23–7.25 (m, 1H, ArH), 7.28–7.29 (m, 1H, ArH), 7.43–7.45 (m, 1H, ArH), 7.54–7.57 (m, 2H, ArH), 7.68–7.69 (m, 1H, ArH), 8.01–8.03 (d,  $J$  = 7.80 Hz, 2H, ArH), 8.68 (s, 1H, CH);  $^{13}\text{C}$  NMR (125 MHz,  $\text{DMSO-}d_6$ ):  $\delta$  = 49.1, 53.4, 98.6, 115.6, 116.0, 118.6, 124.6, 126.9, 129.5, 129.5, 129.7, 129.7, 132.8, 134.7, 134.9, 135.7, 146.0, 152.4, 155.0, 159.4, 195.8; HRMS (TOF  $\text{ES}^+$ ):  $m/z$  calcd for  $\text{C}_{21}\text{H}_{14}\text{N}_2\text{O}_3$  [(M+H) $^+$ ], 343.1077; found, 343.1080.

#### 12-(4-Methylbenzoyl)-9,10-dihydro-6H-chromeno[4,3-d]imidazo[1,2-a]pyridin-6-one (4e)

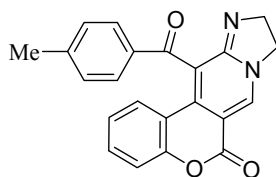

Orange solid; Mp 271–274 °C; IR (KBr): 1724, 1664, 1618, 1519, 1450, 1323, 1271, 1222, 1139, 1094, 755  $\text{cm}^{-1}$ ;  $^1\text{H}$  NMR (500 MHz,  $\text{DMSO-}d_6$ ):  $\delta$  = 2.37 (s, 3H,  $\text{CH}_3$ ),

3.77 (m, 2H, CH<sub>2</sub>), 4.17–4.21 (m, 2H, CH<sub>2</sub>), 6.99–7.02 (m, 1H, ArH), 7.22–7.24 (d,  $J = 8.10$  Hz, 1H, ArH), 7.30–7.32 (d,  $J = 8.20$  Hz, 1H, ArH), 7.34–7.35 (d,  $J = 7.80$  Hz, 2H, ArH), 7.42–7.45 (m, 1H, ArH), 7.89–7.91 (d,  $J = 7.85$  Hz, 2H, ArH), 8.66 (s, 1H, CH); <sup>13</sup>C NMR (125 MHz, DMSO-*d*<sub>6</sub>):  $\delta = 21.7, 49.1, 53.4, 98.6, 115.7, 116.2, 118.5, 124.6, 126.9, 129.6, 129.6, 130.3, 130.3, 132.8, 133.4, 134.4, 145.7, 145.9, 152.4, 155.0, 159.4, 195.2$ ; HRMS (TOF ES<sup>+</sup>):  $m/z$  calcd for C<sub>22</sub>H<sub>16</sub>N<sub>2</sub>O<sub>3</sub> [(M+H)<sup>+</sup>], 357.1234; found, 357.1233.

**12-(4-Methoxybenzoyl)-9,10-dihydro-6*H*-chromeno[4,3-*d*]imidazo[1,2-*a*]pyridin-6-one (4f)**

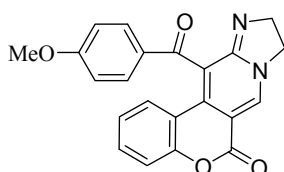

Orange solid; Mp 224–227 °C; IR (KBr): 1724, 1618, 1519, 1458, 1323, 1268, 1155, 1012, 763 cm<sup>-1</sup>; <sup>1</sup>H NMR (500 MHz, DMSO-*d*<sub>6</sub>):  $\delta = 3.76$ – $3.80$  (m, 2H, CH<sub>2</sub>), 3.85 (s, 3H, OCH<sub>3</sub>), 4.20 (m, 2H, CH<sub>2</sub>), 7.01–7.07 (m, 3H, ArH), 7.23–7.25 (d,  $J = 8.45$  Hz, 1H, ArH), 7.35–7.36 (d,  $J = 8.25$  Hz, 1H, ArH), 7.43–7.46 (m, 1H, ArH), 7.97–7.98 (d,  $J = 7.00$  Hz, 2H, ArH), 8.68 (s, 1H, CH); <sup>13</sup>C NMR (125 MHz, DMSO-*d*<sub>6</sub>):  $\delta = 49.1, 53.4, 56.0, 98.6, 115.0, 115.0, 115.8, 116.5, 118.5, 124.6, 127.0, 128.9, 131.9, 131.9, 132.7, 134.2, 145.8, 152.4, 155.0, 159.4, 164.6, 194.0$ ; HRMS (TOF ES<sup>+</sup>):  $m/z$  calcd for C<sub>22</sub>H<sub>16</sub>N<sub>2</sub>O<sub>4</sub> [(M+H)<sup>+</sup>], 373.1183; found, 373.1189.

**2-Bromo-12-(4-fluorobenzoyl)-9,10-dihydro-6*H*-chromeno[4,3-*d*]imidazo[1,2-*a*]pyridin-6-one (4g)**

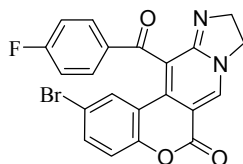

Orange solid; Mp 296–299 °C; IR (KBr): 1721, 1669, 1623, 1513, 1327, 1224, 1145, 959, 829 cm<sup>-1</sup>; <sup>1</sup>H NMR (500 MHz, DMSO-*d*<sub>6</sub>+CDCl<sub>3</sub>):  $\delta = 3.79$ – $3.83$  (m, 2H, CH<sub>2</sub>), 4.19–4.23 (m, 2H, CH<sub>2</sub>), 7.18–7.20 (d,  $J = 8.70$  Hz, 2H, ArH), 7.35–7.39 (m, 3H, ArH), 7.58–7.60 (d,  $J = 8.60$  Hz, 1H, ArH), 8.10–8.13 (m, 2H, ArH), 8.67 (s, 1H, CH); <sup>13</sup>C NMR (125 MHz, DMSO-*d*<sub>6</sub>+CDCl<sub>3</sub>):  $\delta = 49.2, 53.6, 98.2, 116.1, 116.9, 117.1, 117.6, 120.8, 129.1, 132.4, 132.5, 132.5, 133.5, 135.2, 146.3, 151.6, 154.8, 158.8,$

165.5, 167.7, 194.1; HRMS (TOF ES<sup>+</sup>):  $m/z$  calcd for C<sub>21</sub>H<sub>12</sub>BrFN<sub>2</sub>O<sub>3</sub> [(M+H)<sup>+</sup>], 439.0088; found, 439.0090.

**2-Bromo-12-(4-chlorobenzoyl)-9,10-dihydro-6H-chromeno[4,3-d]imidazo[1,2-a]pyridin-6-one (4h)**

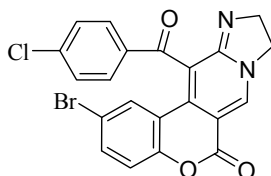

Orange solid; Mp 302–305 °C; IR (KBr): 1714, 1669, 1622, 1523, 1458, 1331, 1272, 1213, 1094, 963, 653 cm<sup>-1</sup>; <sup>1</sup>H NMR (500 MHz, DMSO-*d*<sub>6</sub>):  $\delta$  = 3.80 (m, 2H, CH<sub>2</sub>), 4.21 (m, 2H, CH<sub>2</sub>), 7.22–7.24 (d,  $J$  = 8.80 Hz, 1H, ArH), 7.35–7.36 (m, 1H, ArH), 7.55 (m, 1H, ArH), 7.63–7.66 (m, 3H, ArH), 8.04–8.06 (d,  $J$  = 8.40 Hz, 1H, ArH), 8.71 (s, 1H, CH); <sup>13</sup>C NMR (125 MHz, DMSO-*d*<sub>6</sub>):  $\delta$  = 49.2, 53.5, 98.4, 115.8, 116.0, 120.9, 128.5, 129.0, 130.1, 130.1, 130.4, 131.3, 131.3, 134.3, 135.3, 140.2, 146.4, 151.7, 154.8, 158.8, 194.6; HRMS (TOF ES<sup>+</sup>):  $m/z$  calcd for C<sub>21</sub>H<sub>12</sub>BrClN<sub>2</sub>O<sub>3</sub> [(M+H)<sup>+</sup>], 454.9793; found, 454.9795.

**12-Benzoyl-2-bromo-9,10-dihydro-6H-chromeno[4,3-d]imidazo[1,2-a]pyridin-6-one (4i)**

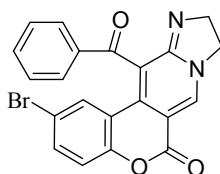

Orange solid; Mp 302.5–305 °C; IR (KBr): 1719, 1667, 1618, 1521, 1450, 1326, 1269, 1217, 1109, 963, 751 cm<sup>-1</sup>; <sup>1</sup>H NMR (500 MHz, DMSO-*d*<sub>6</sub>):  $\delta$  = 3.80 (m, 2H, CH<sub>2</sub>), 4.19–4.21 (m, 2H, CH<sub>2</sub>), 7.19–7.20 (m, 1H, ArH), 7.42 (s, 1H, ArH), 7.57–7.59 (m, 3H, ArH), 7.72 (m, 1H, ArH), 8.03–8.04 (m, 2H, ArH), 8.67 (s, 1H, CH); <sup>13</sup>C NMR (125 MHz, DMSO-*d*<sub>6</sub>):  $\delta$  = 49.2, 53.6, 98.2, 116.0, 116.6, 117.7, 120.8, 129.2, 129.4, 129.4, 129.8, 129.8, 133.4, 135.2, 135.2, 135.6, 146.3, 151.7, 154.8, 158.9, 195.6; HRMS (TOF ES<sup>+</sup>):  $m/z$  calcd for C<sub>21</sub>H<sub>13</sub>BrN<sub>2</sub>O<sub>3</sub> [(M+H)<sup>+</sup>], 421.0182; found, 421.0186.

**2-Bromo-12-(4-methylbenzoyl)-9,10-dihydro-6H-chromeno[4,3-d]imidazo[1,2-a]pyridin-6-one (4j)**

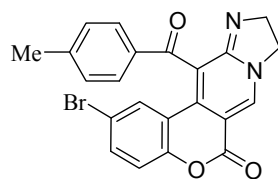

Orange solid; Mp 308–311 °C; IR (KBr): 1719, 1663, 1618, 1515, 1475, 1417, 1335, 1271, 1216, 1111, 967  $\text{cm}^{-1}$ ;  $^1\text{H}$  NMR (500 MHz,  $\text{DMSO-}d_6$ ):  $\delta$  = 2.40 (s, 3H,  $\text{CH}_3$ ), 3.79 (m, 2H,  $\text{CH}_2$ ), 4.18–4.22 (m, 2H,  $\text{CH}_2$ ), 7.20–7.22 (d,  $J$  = 8.75 Hz, 1H, ArH), 7.37–7.38 (d,  $J$  = 7.60 Hz, 2H, ArH), 7.43 (s, 1H, ArH), 7.61–7.62 (d,  $J$  = 8.70 Hz, 1H, ArH), 7.91–7.93 (d,  $J$  = 7.45 Hz, 2H, ArH), 8.68 (s, 1H, CH);  $^{13}\text{C}$  NMR (125 MHz,  $\text{DMSO-}d_6$ ):  $\delta$  = 21.7, 49.2, 53.5, 98.1, 116.0, 116.9, 117.7, 120.8, 129.2, 129.5, 129.5, 130.4, 130.4, 133.1, 133.2, 135.1, 146.0, 146.2, 151.6, 154.8, 158.9, 195.1; HRMS (TOF  $\text{ES}^+$ ):  $m/z$  calcd for  $\text{C}_{22}\text{H}_{15}\text{BrN}_2\text{O}_3$  [(M+H) $^+$ ], 435.0339; found, 435.0335

**2-Bromo-12-(4-methoxybenzoyl)-9,10-dihydro-6H-chromeno[4,3-d]imidazo[1,2-a]pyridin-6-one (4k)**

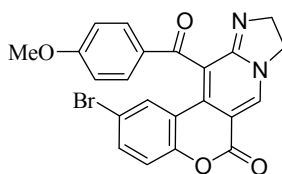

Orange solid; Mp 295–298 °C; IR (KBr): 1719, 1659, 1618, 1514, 1460, 1405, 1325, 1267, 1219, 1155, 1129, 1033, 955, 829  $\text{cm}^{-1}$ ;  $^1\text{H}$  NMR (500 MHz,  $\text{DMSO-}d_6$ ):  $\delta$  = 3.82 (m, 2H,  $\text{CH}_2$ ), 3.85 (s, 3H,  $\text{OCH}_3$ ), 4.20 (m, 2H,  $\text{CH}_2$ ), 7.07–7.08 (d,  $J$  = 7.65 Hz, 2H, ArH), 7.17–7.19 (d,  $J$  = 8.40 Hz, 1H, ArH), 7.48 (s, 1H, ArH), 7.58–7.60 (d,  $J$  = 8.00 Hz, 1H, ArH), 7.99–8.01 (d,  $J$  = 7.60 Hz, 2H, ArH), 8.66 (s, 1H, CH);  $^{13}\text{C}$  NMR (125 MHz,  $\text{DMSO-}d_6$ ):  $\delta$  = 49.2, 53.6, 56.1, 98.1, 115.1, 115.1, 116.0, 117.1, 117.8, 120.7, 128.7, 129.3, 131.9, 131.9, 132.9, 135.0, 146.0, 151.6, 154.9, 158.9, 164.8, 193.7; HRMS (TOF  $\text{ES}^+$ ):  $m/z$  calcd for  $\text{C}_{22}\text{H}_{15}\text{BrN}_2\text{O}_4$  [(M+H) $^+$ ], 451.0288; found, 451.0285.

**10,11-Dihydro-13-(4-fluorobenzoyl)-12-azachromeno[4,3-b]quinolizin-6(9H)-one (4l)**

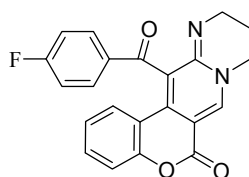



Yellow solid; Mp 284–287 °C; IR (KBr): 3422, 1720, 1677, 1617, 1550, 1485, 1301, 1232, 1149, 1099, 751 cm<sup>-1</sup>; <sup>1</sup>H NMR (500 MHz, DMSO-*d*<sub>6</sub>): δ = 1.82 (m, 2H, CH<sub>2</sub>), 3.23 (m, 2H, CH<sub>2</sub>), 4.09 (m, 2H, CH<sub>2</sub>), 6.96–6.97 (m, 1H, ArH), 7.16–7.18 (d, *J* = 7.70 Hz, 1H, ArH), 7.26–7.28 (m, 3H, ArH), 7.37–7.38 (m, 1H, ArH), 8.05 (m, 2H, ArH), 8.35 (s, 1H, CH); <sup>13</sup>C NMR (125 MHz, DMSO-*d*<sub>6</sub>): δ = 19.8, 44.4, 50.5, 98.4, 115.5, 116.6, 116.5, 118.4, 123.4, 124.5, 126.8, 130.7, 132.0, 132.0, 132.2, 133.2, 147.8, 148.3, 152.3, 159.5, 164.8–166.8(d, *J* = 251.30 Hz), 195.3; HRMS (TOF ES<sup>+</sup>): *m/z* calcd for C<sub>22</sub>H<sub>15</sub>FN<sub>2</sub>O<sub>3</sub> [(M+H)<sup>+</sup>], 375.1139; found, 375.1147.

**10,11-Dihydro-13-(4-chlorobenzoyl)-12-azachromeno[4,3-*b*]quinolizin-6(9*H*)-one (4m)**

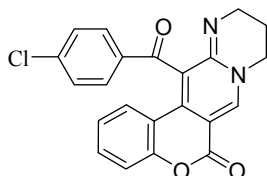

Yellow solid; Mp 293–296 °C; IR (KBr): 3419, 1720, 1677, 1617, 1535, 1450, 1303, 1229, 1155, 1097, 747 cm<sup>-1</sup>; <sup>1</sup>H NMR (500 MHz, DMSO-*d*<sub>6</sub>): δ = 1.82 (m, 2H, CH<sub>2</sub>), 3.26 (m, 2H, CH<sub>2</sub>), 4.09 (m, 2H, CH<sub>2</sub>), 7.01 (m, 1H, ArH), 7.21–7.23 (d, *J* = 7.20 Hz, 1H, ArH), 7.26–7.27 (d, *J* = 7.00 Hz, 1H, ArH), 7.43 (m, 1H, ArH), 7.57–7.58 (d, *J* = 6.80 Hz, 2H, ArH), 7.99–8.00 (d, *J* = 6.75 Hz, 2H, ArH), 8.35 (s, 1H, CH); <sup>13</sup>C NMR (125 MHz, DMSO-*d*<sub>6</sub>): δ = 19.8, 44.4, 50.5, 98.3, 115.5, 118.6, 123.1, 124.7, 126.7, 129.7, 129.7, 130.8, 130.8, 130.8, 132.4, 135.3, 139.2, 147.8, 148.4, 152.3, 159.5, 195.8; HRMS (TOF ES<sup>+</sup>): *m/z* calcd for C<sub>22</sub>H<sub>15</sub>ClN<sub>2</sub>O<sub>3</sub> [(M+H)<sup>+</sup>], 391.0844; found, 391.0847.

**10,11-Dihydro-13-benzoyl-12-azachromeno[4,3-*b*]quinolizin-6(9*H*)-one (4n)**

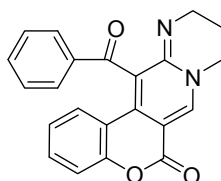

Yellow solid; Mp 261–264 °C; IR (KBr): 3436, 1695, 1593, 1501, 1374, 1279, 1184, 1052, 743 cm<sup>-1</sup>; <sup>1</sup>H NMR (500 MHz, DMSO-*d*<sub>6</sub>): δ = 1.78–1.79 (m, 2H, CH<sub>2</sub>), 3.28 (m, 1H, CH<sub>2</sub>), 4.07–4.13 (m, 3H, CH<sub>2</sub>), 6.96 (m, 1H, ArH), 7.19–7.20 (d, *J* = 8.25 Hz, 1H, ArH), 7.27–7.28 (d, *J* = 8.05 Hz, 1H, ArH), 7.39 (m, 1H, ArH), 7.49–7.52 (m, 2H, ArH), 7.63 (m, 1H, ArH), 7.97–7.99 (d, *J* = 7.65 Hz, 2H, ArH), 8.35 (s, 1H, CH); <sup>13</sup>C

NMR (125 MHz, DMSO- $d_6$ ):  $\delta$  = 19.8, 44.4, 50.4, 98.2, 115.6, 118.5, 123.7, 124.6, 126.8, 129.2, 129.2, 129.6, 129.6, 130.5, 132.3, 134.3, 136.5, 147.8, 148.3, 152.2, 159.6, 196.9; HRMS (TOF ES<sup>+</sup>):  $m/z$  calcd for C<sub>22</sub>H<sub>16</sub>N<sub>2</sub>O<sub>3</sub> [(M+H)<sup>+</sup>], 357.1234; found, 357.1243.

**10,11-Dihydro-13-(4-methylbenzoyl)-12-azachromeno[4,3-*b*]quinolizin-6(9*H*)-one (4o)**

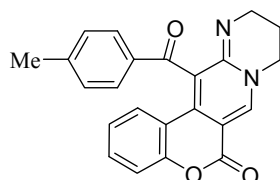

Yellow solid; Mp 279–282 °C; IR (KBr): 1720, 1677, 1535, 1450, 1303, 1229, 1155, 1097, 747 cm<sup>-1</sup>; <sup>1</sup>H NMR (500 MHz, DMSO- $d_6$ ):  $\delta$  = 1.83 (m, 2H, CH<sub>2</sub>), 2.37 (s, 3H, CH<sub>3</sub>), 3.33 (m, 1H, CH<sub>2</sub>), 4.08–4.10 (m, 3H, CH<sub>2</sub>), 6.92–6.95 (m, 1H, ArH), 7.16–7.17 (m,  $J$  = 8.20 Hz, 1H, ArH), 7.28–7.33 (m, 3H, ArH), 7.36–7.39 (m, 1H, ArH), 7.86–7.87 (m,  $J$  = 7.95 Hz, 2H, ArH), 8.32 (s, 1H, CH); <sup>13</sup>C NMR (125 MHz, DMSO- $d_6$ ):  $\delta$  = 19.8, 21.6, 44.4, 50.5, 98.3, 115.6, 118.4, 124.0, 124.4, 127.0, 129.1, 129.1, 130.0, 130.0, 130.3, 132.1, 134.1, 144.7, 147.8, 148.1, 152.2, 159.6, 196.3; HRMS (TOF ES<sup>+</sup>):  $m/z$  calcd for C<sub>23</sub>H<sub>18</sub>N<sub>2</sub>O<sub>3</sub> [(M+H)<sup>+</sup>], 371.1390; found, 371.1389.

**10,11-Dihydro-13-(4-methoxybenzoyl)-12-azachromeno[4,3-*b*]quinolizin-6(9*H*)-one (4p)**

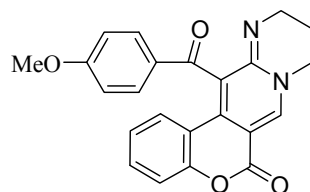

Yellow solid; Mp 259–262 °C; IR (KBr): 1723, 1663, 1613, 1455, 1312, 1243, 1157, 1098, 1029, 747 cm<sup>-1</sup>; <sup>1</sup>H NMR (500 MHz, DMSO- $d_6$ ):  $\delta$  = 1.79–1.80 (m, 2H, CH<sub>2</sub>), 3.19–3.22 (m, 2H, CH<sub>2</sub>), 3.82 (s, 3H, OCH<sub>3</sub>), 4.08 (m, 2H, CH<sub>2</sub>), 6.96–7.03 (m, 3H, ArH), 7.19–7.21 (d,  $J$  = 8.10 Hz, 1H, ArH), 7.34–7.35 (d,  $J$  = 8.20 Hz, 1H, ArH), 7.38–7.41 (m, 1H, ArH), 7.93–7.95 (d,  $J$  = 8.30 Hz, 1H, ArH), 8.34 (s, 1H, CH); <sup>13</sup>C NMR (125 MHz, DMSO- $d_6$ ):  $\delta$  = 19.8, 44.4, 50.5, 55.9, 98.1, 114.8, 114.8, 115.7, 118.5, 124.1, 124.6, 129.6, 129.6, 130.0, 131.4, 131.4, 132.2, 147.7, 148.2, 152.2, 159.6, 164.1, 195.2; HRMS (TOF ES<sup>+</sup>):  $m/z$  calcd for C<sub>23</sub>H<sub>18</sub>N<sub>2</sub>O<sub>4</sub> [(M+H)<sup>+</sup>], 387.1339; found, 387.1340.

**10,11-Dihydro-2-bromo-13-(4-chlorobenzoyl)-12-azachromeno[4,3-*b*]quinolizin-6  
(9*H*)-one (4q)**

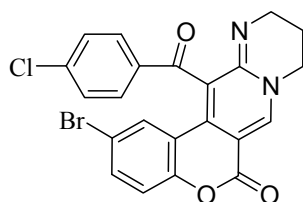

Yellow solid; Mp 305–308 °C; IR (KBr): 1711, 1677, 1616, 1450, 1303, 1198, 1149, 1119, 1004, 820  $\text{cm}^{-1}$ ;  $^1\text{H}$  NMR (500 MHz,  $\text{DMSO-}d_6$ ):  $\delta$  = 1.81 (m, 2H,  $\text{CH}_2$ ), 3.22 (m, 2H,  $\text{CH}_2$ ), 4.09 (m, 2H,  $\text{CH}_2$ ), 7.20–7.21 (d,  $J$  = 8.20 Hz, 1H, ArH), 7.35 (s, 1H, ArH), 7.61–7.63 (m, 3H, ArH), 8.01–8.02 (d,  $J$  = 7.05 Hz, 2H, ArH), 8.37 (s, 1H, CH);  $^{13}\text{C}$  NMR (125 MHz,  $\text{DMSO-}d_6$ ):  $\delta$  = 19.7, 44.4, 50.5, 97.8, 116.1, 117.5, 120.9, 123.7, 128.9, 129.6, 129.9, 129.9, 130.8, 130.8, 134.8, 135.0, 139.5, 147.7, 148.7, 151.5, 159.1, 195.7; HRMS (TOF  $\text{ES}^+$ ):  $m/z$  calcd for  $\text{C}_{22}\text{H}_{14}\text{BrClN}_2\text{O}_3$  [(M+H) $^+$ ], 468.9949; found, 468.9950.

### X-ray Structure and Data<sup>3</sup> of 4d

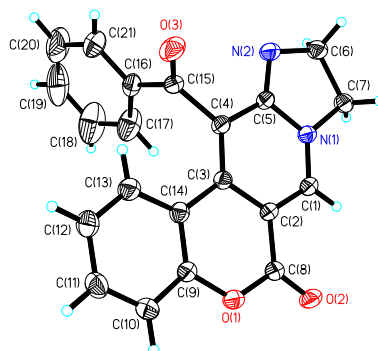

**Figure S1** X-Ray crystal structure of **4d**

**Table S1** Crystal data and structure refinement for **4d**

|                                   |                                                               |                        |
|-----------------------------------|---------------------------------------------------------------|------------------------|
| Empirical formula                 | C <sub>21</sub> H <sub>14</sub> N <sub>2</sub> O <sub>3</sub> |                        |
| Formula weight                    | 342.34                                                        |                        |
| Temperature                       | 298(2) K                                                      |                        |
| Wavelength                        | 0.71073                                                       |                        |
| Crystal system, space group       | Triclinic, P-1                                                |                        |
| Unit cell dimensions              | a = 5.5189(8) Å                                               | alpha = 93.688(2) deg. |
|                                   | b = 9.8023(15) Å                                              | beta = 92.037(2) deg.  |
|                                   | c = 15.110(2) Å                                               | gamma = 90.788(2) deg. |
| Volume                            | 815.1(2)                                                      |                        |
| Z, Calculated density             | 2, 1.395 Mg/m <sup>3</sup>                                    |                        |
| Absorption coefficient            | 0.095 mm <sup>-1</sup>                                        |                        |
| F(000)                            | 356                                                           |                        |
| Crystal size                      | 0.30 x 0.21 x 0.13 mm                                         |                        |
| Theta range for data collection   | 0.9721 to 0.9878 deg.                                         |                        |
| Limiting indices                  | -6 ≤ h ≤ 6, -11 ≤ k ≤ 11, -17 ≤ l ≤ 17                        |                        |
| Reflection collected/unique       | 13201 / 4601 [R(int) = 0.0509]                                |                        |
| Completeness to theta = 28.40     | 99.6 %                                                        |                        |
| Absorption correction             | multi-scan from equivalents                                   |                        |
| Max. and min. transmission        | 0.988 and 0.972                                               |                        |
| Refinement method                 | SHELXL-97                                                     |                        |
| Data/restraints/parameters        | 2865 / 0 / 236                                                |                        |
| Goodness-of-fit on F <sup>2</sup> | 1.016                                                         |                        |
| Final R indices [I > 2σ(I)]       | R1 = 0.0785, wR2 = 0.1234                                     |                        |
| R indices (all data)              | R1 = 0.0446, wR2 = 0.1099                                     |                        |
| Extinction coefficient            | 0.009(3)                                                      |                        |
| Largest diff. peak and hole       | 0.157 and -0.183 e.Å <sup>-3</sup>                            |                        |

**Table S2** Bond lengths [Å] and angles [deg] for **4d**

---

|             |          |
|-------------|----------|
| N(1)-C(1)   | 1.324(2) |
| N(1)-C(5)   | 1.409(2) |
| N(1)-C(7)   | 1.474(2) |
| N(2)-C(5)   | 1.281(2) |
| N(2)-C(6)   | 1.475(2) |
| O(1)-C(8)   | 1.375(2) |
| O(1)-C(9)   | 1.386(2) |
| O(2)-C(8)   | 1.208(2) |
| O(3)-C(15)  | 1.213(2) |
| C(1)-C(2)   | 1.378(2) |
| C(1)-H(1)   | 0.9300   |
| C(2)-C(3)   | 1.444(2) |
| C(2)-C(8)   | 1.445(2) |
| C(3)-C(4)   | 1.379(2) |
| C(3)-C(14)  | 1.480(2) |
| C(4)-C(5)   | 1.448(2) |
| C(4)-C(15)  | 1.514(2) |
| C(6)-C(7)   | 1.533(3) |
| C(6)-H(6A)  | 0.9700   |
| C(6)-H(6B)  | 0.9700   |
| C(7)-H(7A)  | 0.9700   |
| C(7)-H(7B)  | 0.9700   |
| C(9)-C(10)  | 1.390(3) |
| C(9)-C(14)  | 1.397(3) |
| C(10)-C(11) | 1.372(3) |
| C(10)-H(10) | 0.9300   |
| C(11)-C(12) | 1.385(3) |
| C(11)-H(11) | 0.9300   |
| C(12)-C(13) | 1.376(3) |
| C(12)-H(12) | 0.9300   |
| C(13)-C(14) | 1.401(2) |
| C(13)-H(13) | 0.9300   |
| C(15)-C(16) | 1.490(3) |
| C(16)-C(17) | 1.375(3) |
| C(16)-C(21) | 1.375(3) |
| C(17)-C(18) | 1.389(4) |
| C(17)-H(17) | 0.9300   |
| C(18)-C(19) | 1.366(4) |
| C(18)-H(18) | 0.9300   |
| C(19)-C(20) | 1.356(5) |
| C(19)-H(19) | 0.9300   |
| C(20)-C(21) | 1.380(4) |
| C(20)-H(20) | 0.9300   |
| C(21)-H(21) | 0.9300   |

---

Symmetry transformations used to generate equivalent atoms:

**Table S3** Torsion angles [deg] for **4d**

|                         |              |
|-------------------------|--------------|
| C(5)-N(1)-C(1)-C(2)     | -2.2(3)      |
| C(7)-N(1)-C(1)-C(2)     | 179.22(17)   |
| N(1)-C(1)-C(2)-C(3)     | 1.7(3)       |
| N(1)-C(1)-C(2)-C(8)     | 179.68(17)   |
| C(1)-C(2)-C(3)-C(4)     | 1.4(3)       |
| C(8)-C(2)-C(3)-C(4)     | -176.39(18)  |
| C(1)-C(2)-C(3)-C(14)    | -178.88(16)  |
| C(8)-C(2)-C(3)-C(14)    | 3.3(3)       |
| C(2)-C(3)-C(4)-C(5)     | -4.0(3)      |
| C(14)-C(3)-C(4)-C(5)    | 176.32(16)   |
| C(2)-C(3)-C(4)-C(15)    | 173.04(17)   |
| C(14)-C(3)-C(4)-C(15)   | -6.6(3)      |
| C(6)-N(2)-C(5)-N(1)     | 3.6(2)       |
| C(6)-N(2)-C(5)-C(4)     | -175.27(18)  |
| C(1)-N(1)-C(5)-N(2)     | -179.42(18)  |
| C(7)-N(1)-C(5)-N(2)     | -0.6(2)      |
| C(1)-N(1)-C(5)-C(4)     | -0.4(3)      |
| C(7)-N(1)-C(5)-C(4)     | 178.43(15)   |
| C(3)-C(4)-C(5)-N(2)     | -177.56(19)  |
| C(15)-C(4)-C(5)-N(2)    | 4.9(3)       |
| C(3)-C(4)-C(5)-N(1)     | 3.6(3)       |
| C(15)-C(4)-C(5)-N(1)    | -173.94(16)  |
| C(5)-N(2)-C(6)-C(7)     | -5.1(2)      |
| C(1)-N(1)-C(7)-C(6)     | 176.21(18)   |
| C(5)-N(1)-C(7)-C(6)     | -2.5(2)      |
| N(2)-C(6)-C(7)-N(1)     | 4.5(2)       |
| C(9)-O(1)-C(8)-O(2)     | 179.93(17)   |
| C(9)-O(1)-C(8)-C(2)     | 0.4(3)       |
| C(1)-C(2)-C(8)-O(2)     | -0.1(3)      |
| C(3)-C(2)-C(8)-O(2)     | 177.79(19)   |
| C(1)-C(2)-C(8)-O(1)     | 179.42(15)   |
| C(3)-C(2)-C(8)-O(1)     | -2.7(3)      |
| C(8)-O(1)-C(9)-C(10)    | -177.68(16)  |
| C(8)-O(1)-C(9)-C(14)    | 1.2(3)       |
| O(1)-C(9)-C(10)-C(11)   | 177.84(18)   |
| C(14)-C(9)-C(10)-C(11)  | -1.0(3)      |
| C(9)-C(10)-C(11)-C(12)  | 0.7(3)       |
| C(10)-C(11)-C(12)-C(13) | -0.1(3)      |
| C(11)-C(12)-C(13)-C(14) | -0.3(3)      |
| O(1)-C(9)-C(14)-C(13)   | -178.15(17)  |
| C(10)-C(9)-C(14)-C(13)  | 0.6(3)       |
| O(1)-C(9)-C(14)-C(3)    | -0.4(3)      |
| C(10)-C(9)-C(14)-C(3)   | 178.32(16)   |
| C(12)-C(13)-C(14)-C(9)  | 0.1(3)       |
| C(12)-C(13)-C(14)-C(3)  | -177.48(18)? |
| C(4)-C(3)-C(14)-C(9)    | 177.97(18)   |
| C(2)-C(3)-C(14)-C(9)    | -1.7(2)      |

---

|                         |             |
|-------------------------|-------------|
| C(4)-C(3)-C(14)-C(13)   | -4.5(3)     |
| C(2)-C(3)-C(14)-C(13)   | 175.80(18)  |
| C(3)-C(4)-C(15)-O(3)    | 99.4(2)     |
| C(5)-C(4)-C(15)-O(3)    | -83.3(2)    |
| C(3)-C(4)-C(15)-C(16)   | -84.0(2)    |
| C(5)-C(4)-C(15)-C(16)   | 93.3(2)     |
| O(3)-C(15)-C(16)-C(17)  | -171.2(2)   |
| C(4)-C(15)-C(16)-C(17)  | 12.2(3)     |
| O(3)-C(15)-C(16)-C(21)  | 7.3(3)      |
| C(4)-C(15)-C(16)-C(21)  | -169.25(19) |
| C(21)-C(16)-C(17)-C(18) | -0.7(4)     |
| C(15)-C(16)-C(17)-C(18) | 177.9(2)    |
| C(16)-C(17)-C(18)-C(19) | 1.4(5)      |
| C(17)-C(18)-C(19)-C(20) | -0.6(6)     |
| C(18)-C(19)-C(20)-C(21) | -0.7(6)     |
| C(17)-C(16)-C(21)-C(20) | -0.7(4)     |
| C(15)-C(16)-C(21)-C(20) | -179.3(2)   |
| C(19)-C(20)-C(21)-C(16) | 1.4(5)      |

---

**<sup>1</sup>H NMR and <sup>13</sup>C NMR Spectra for 9,10-Dihydro-6H-chromeno[4,3-d]imidazo[1,2-a]pyridin-6-ones 4**

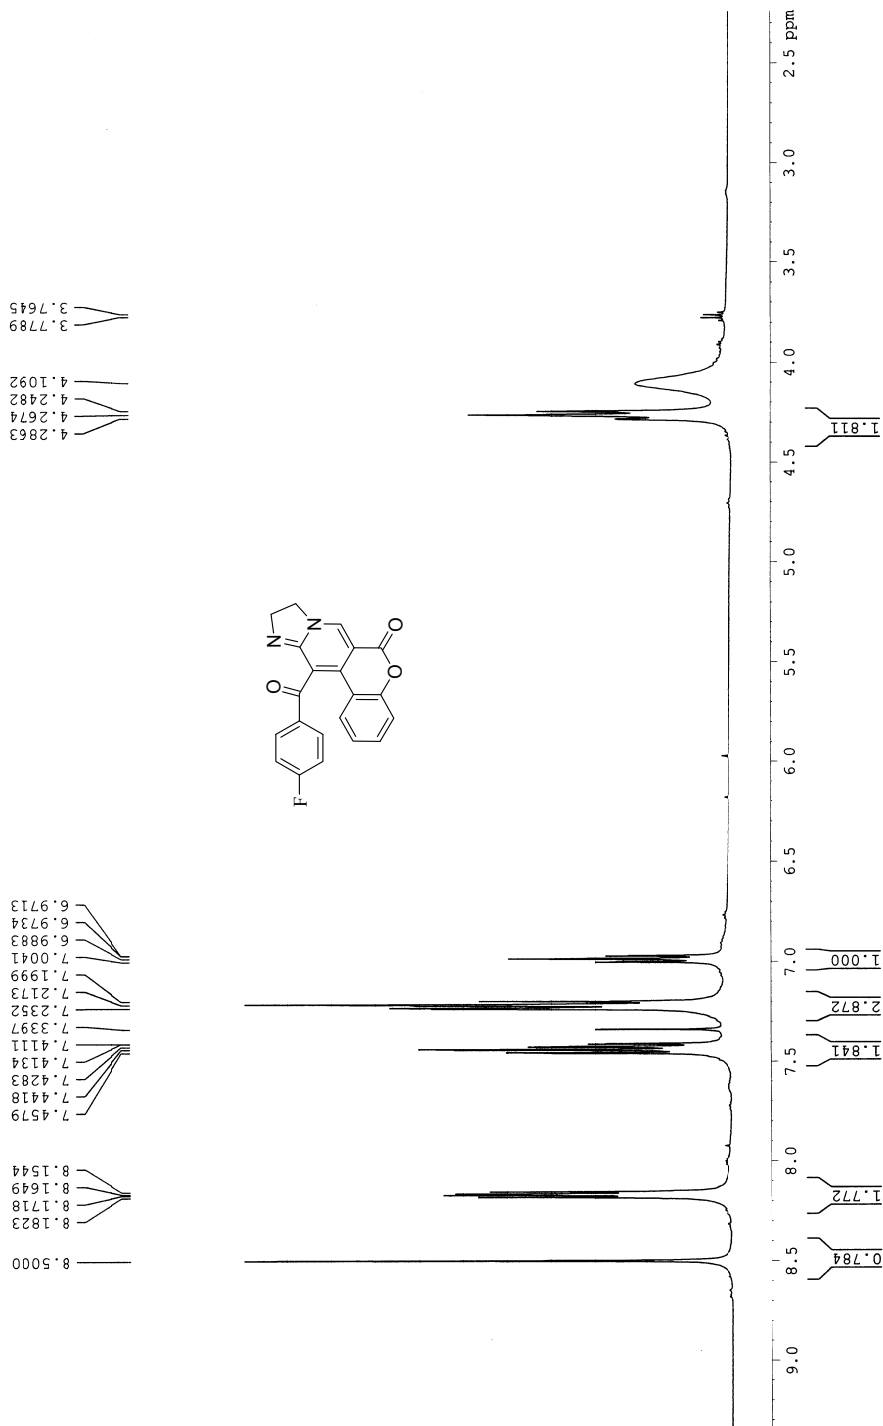

**Figure 1.** <sup>1</sup>H NMR (500 MHz, DMSO-*d*<sub>6</sub>+CDCl<sub>3</sub>) spectra of compound 4a



DEPT135

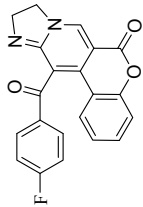

YUNNAN UNIVER. AV. DRX 500  
yufuchao YFC-303 in DMSO+CDCL3  
12102901

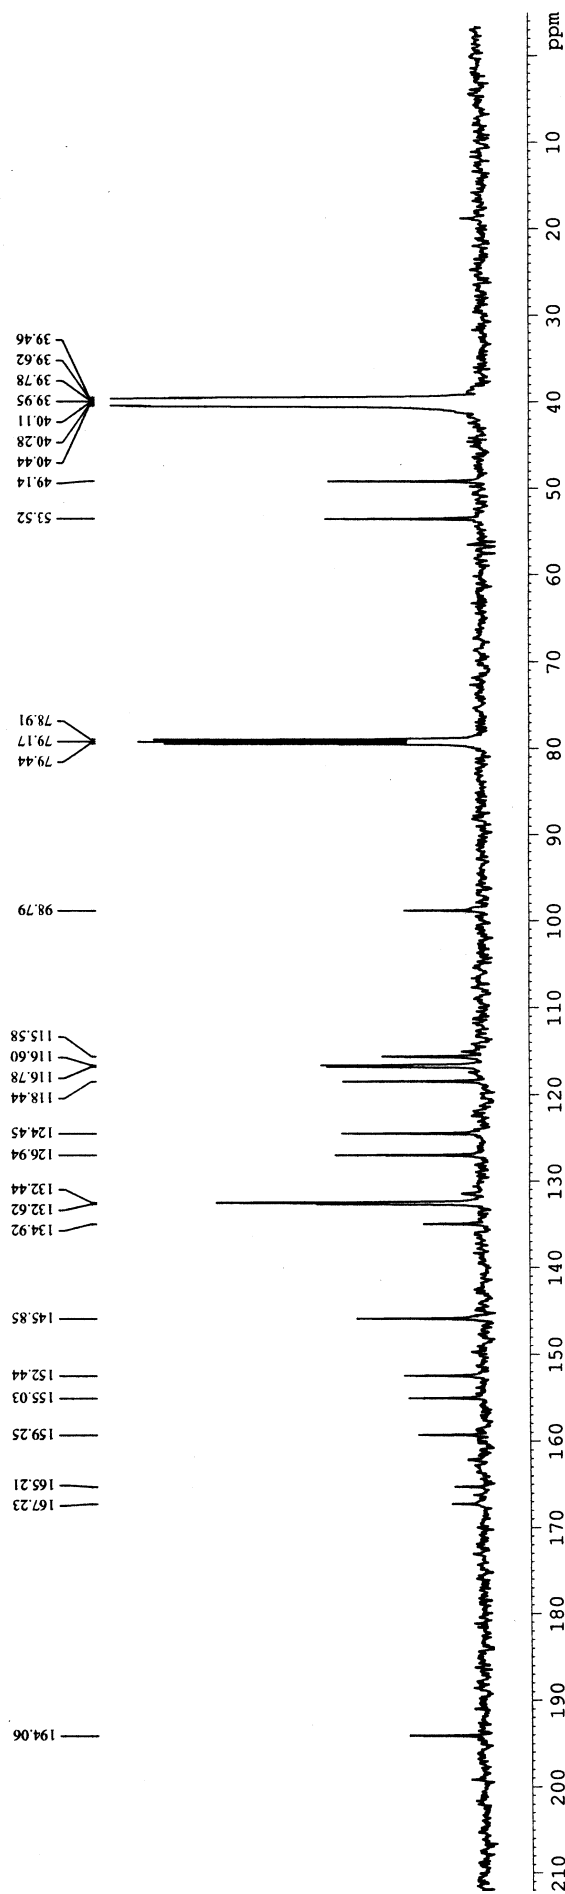

Figure 2.  $^{13}\text{C}$  NMR (125 MHz,  $\text{DMSO-}d_6+\text{CDCl}_3$ ) spectra of compound 4a

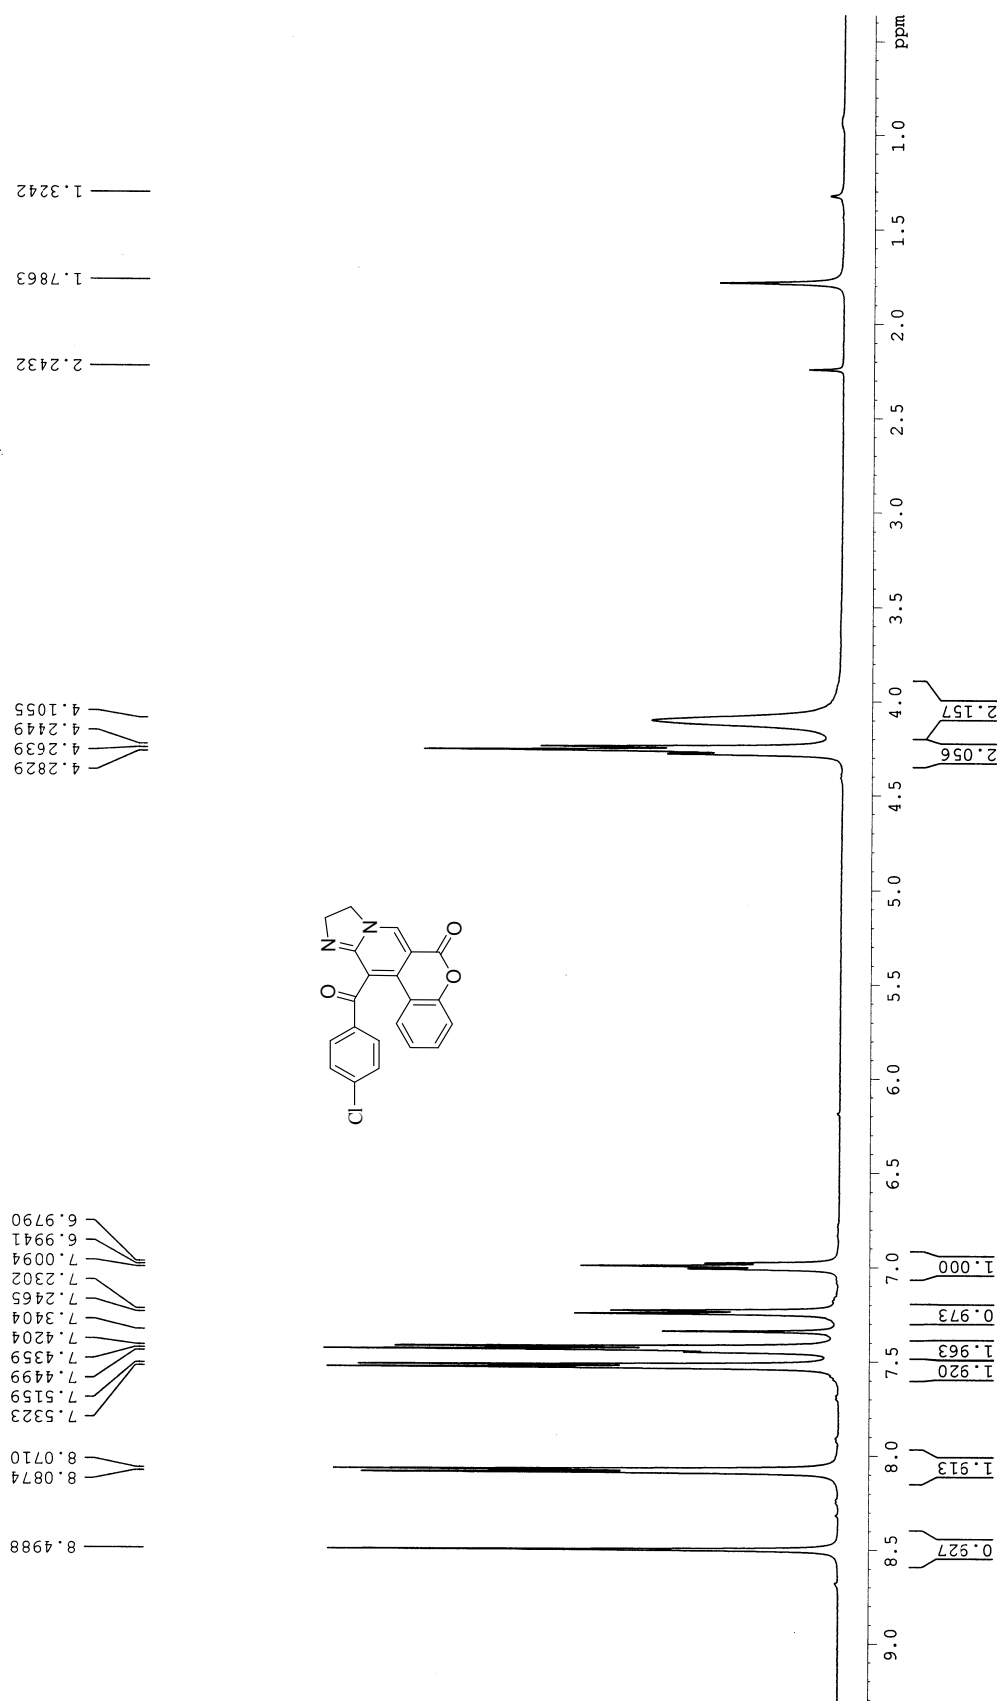

**Figure 3.** <sup>1</sup>H NMR (500 MHz, DMSO-*d*<sub>6</sub>+CDCl<sub>3</sub>) spectra of compound **4b**

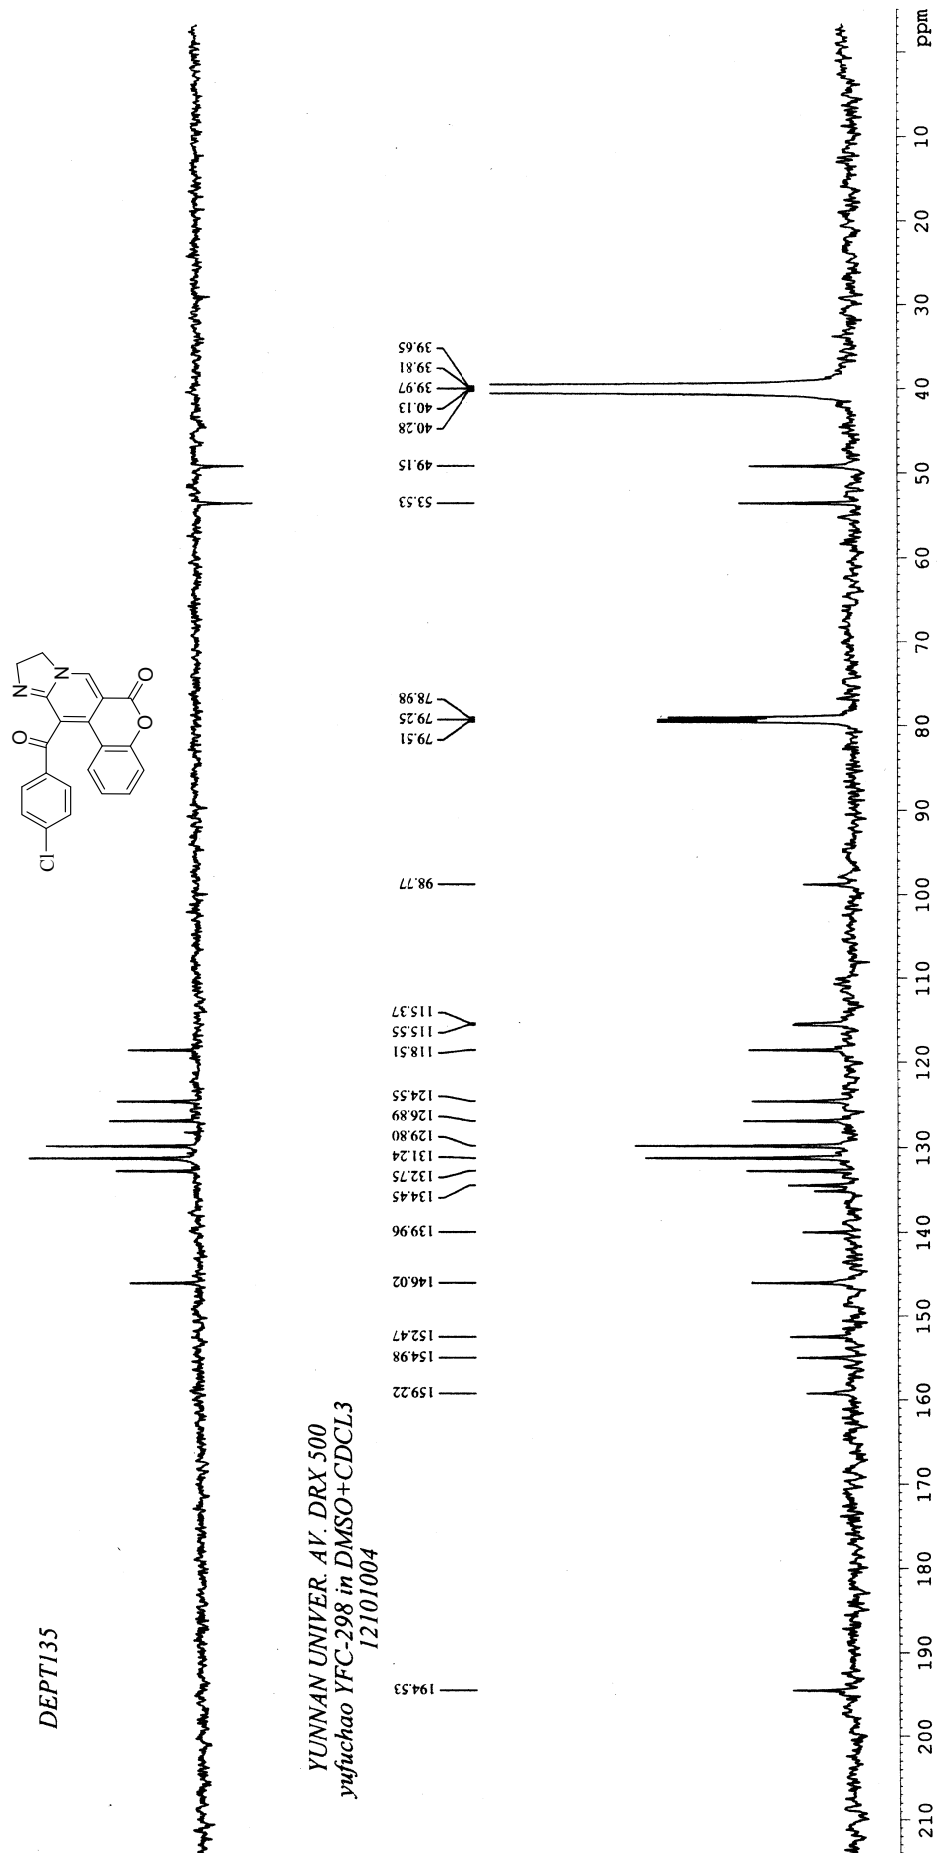

Figure 4. <sup>13</sup>C NMR (125 MHz, DMSO-*d*<sub>6</sub>+CDCl<sub>3</sub>) spectra of compound 4b

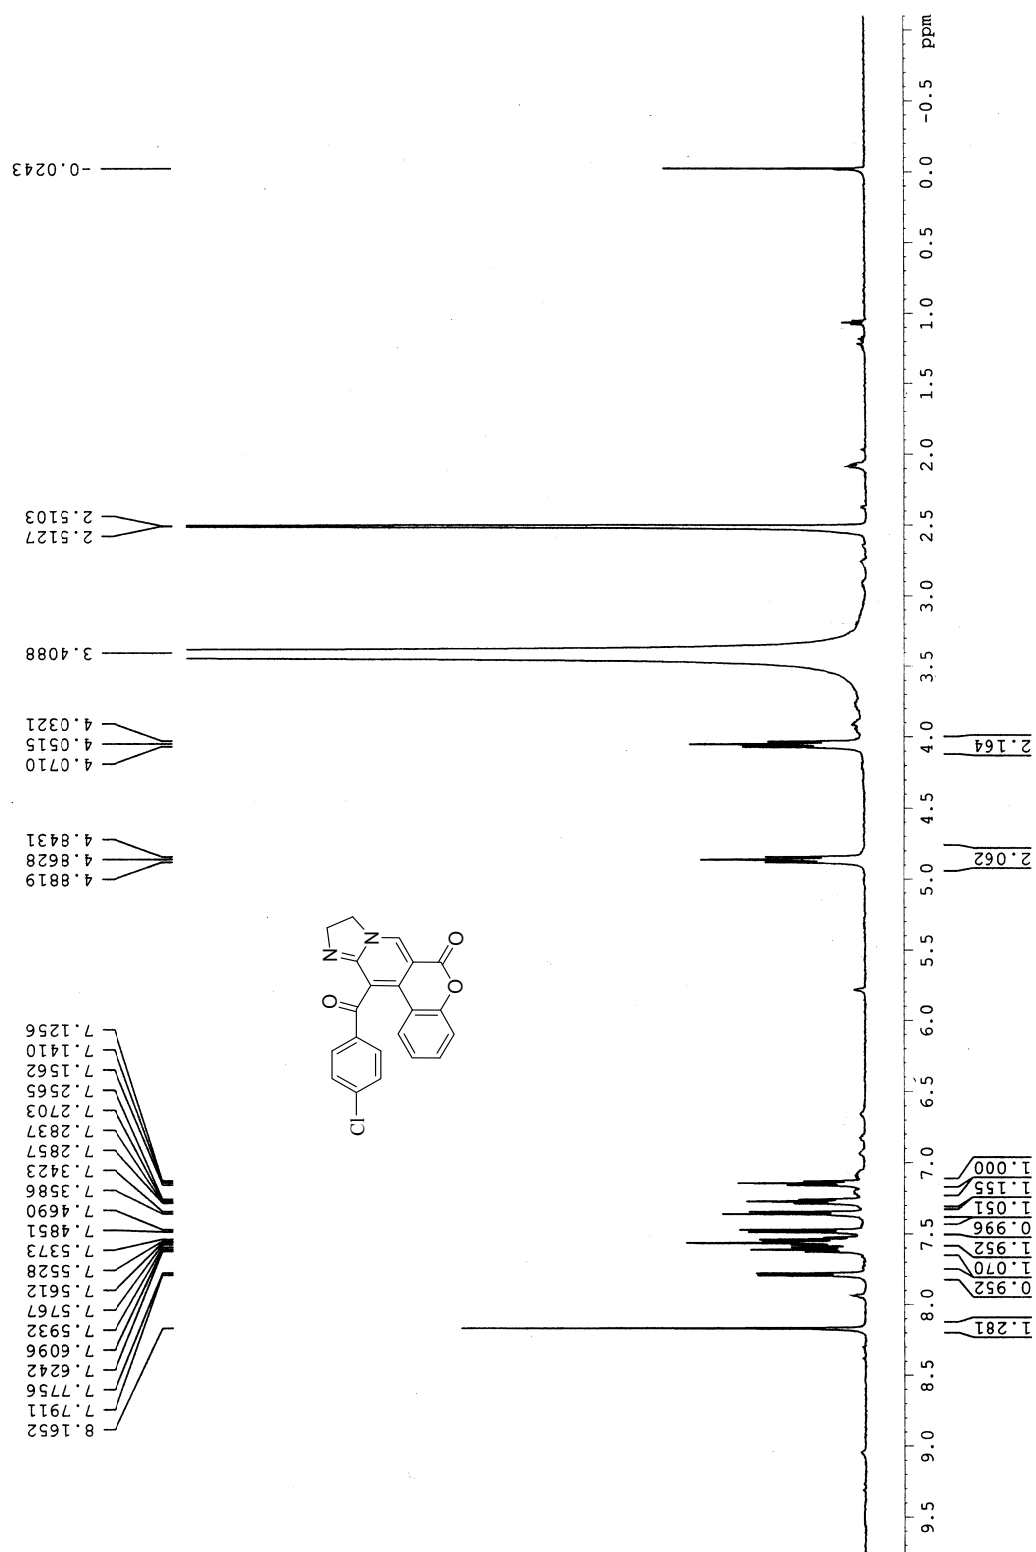

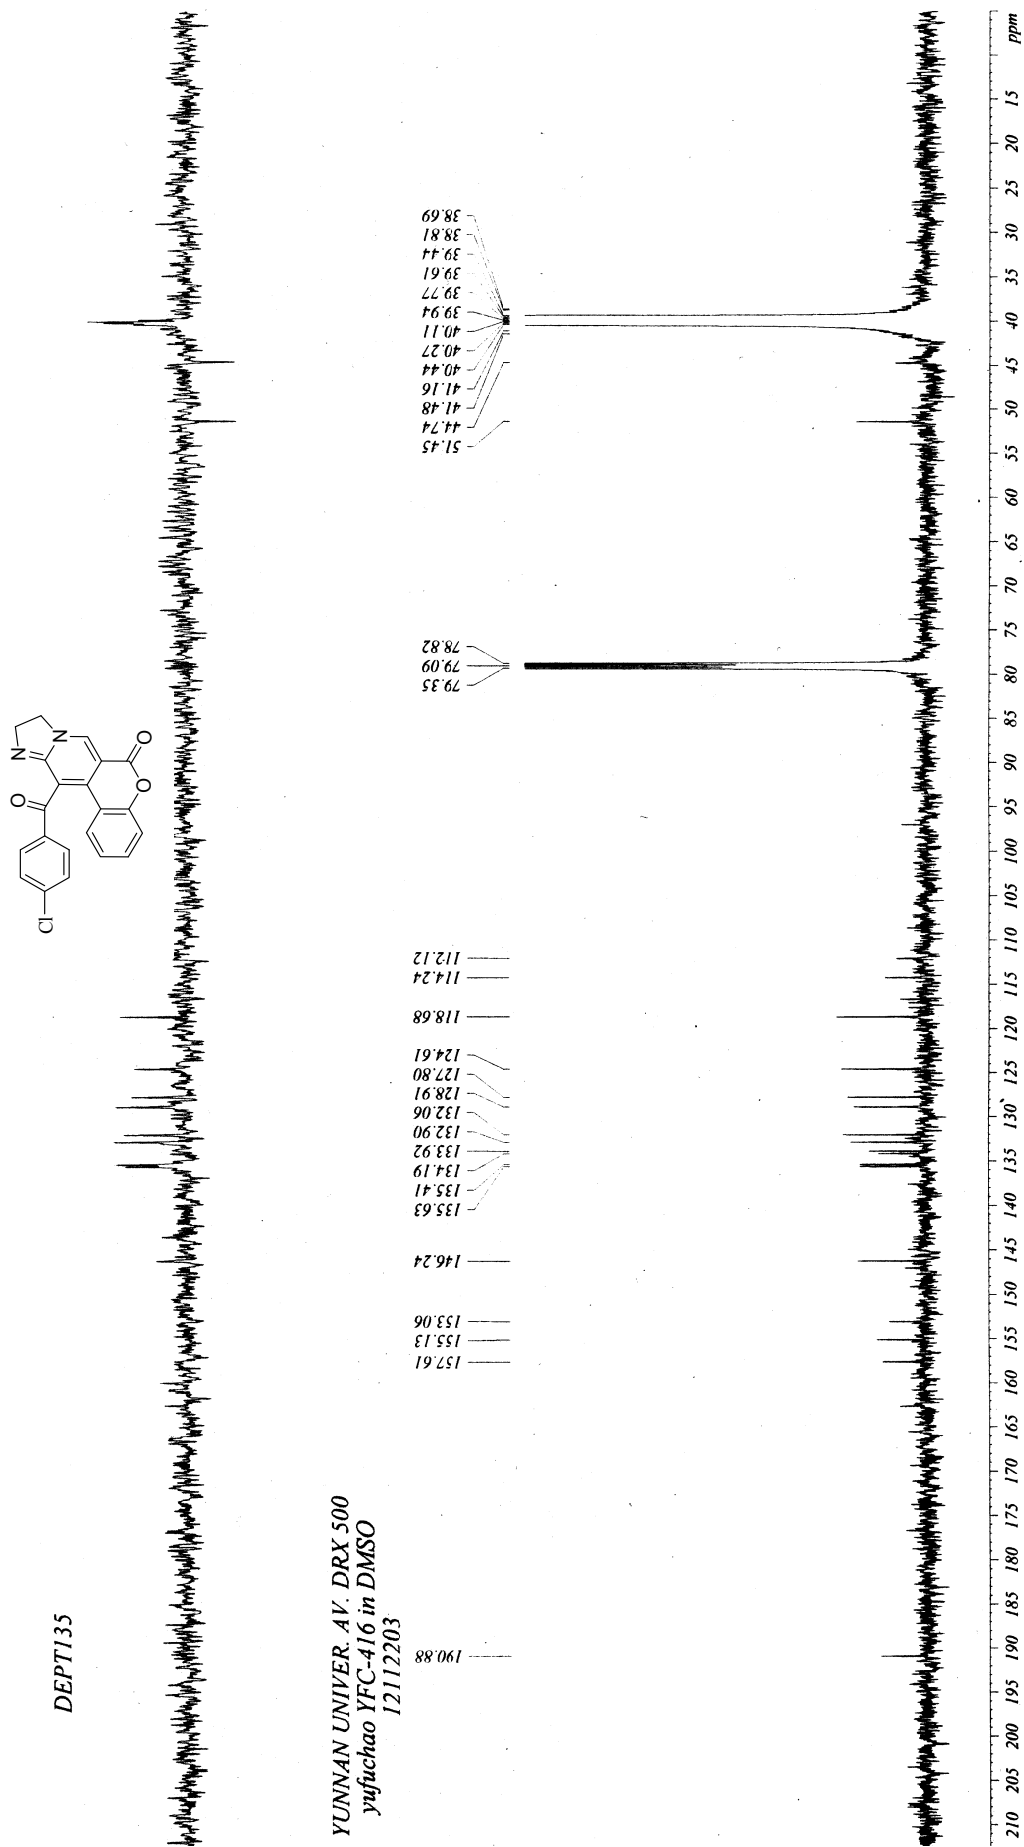

Figure 6.  $^{13}\text{C}$  NMR (125 MHz,  $\text{DMSO}-d_6+\text{CDCl}_3$ ) spectra of compound 4c

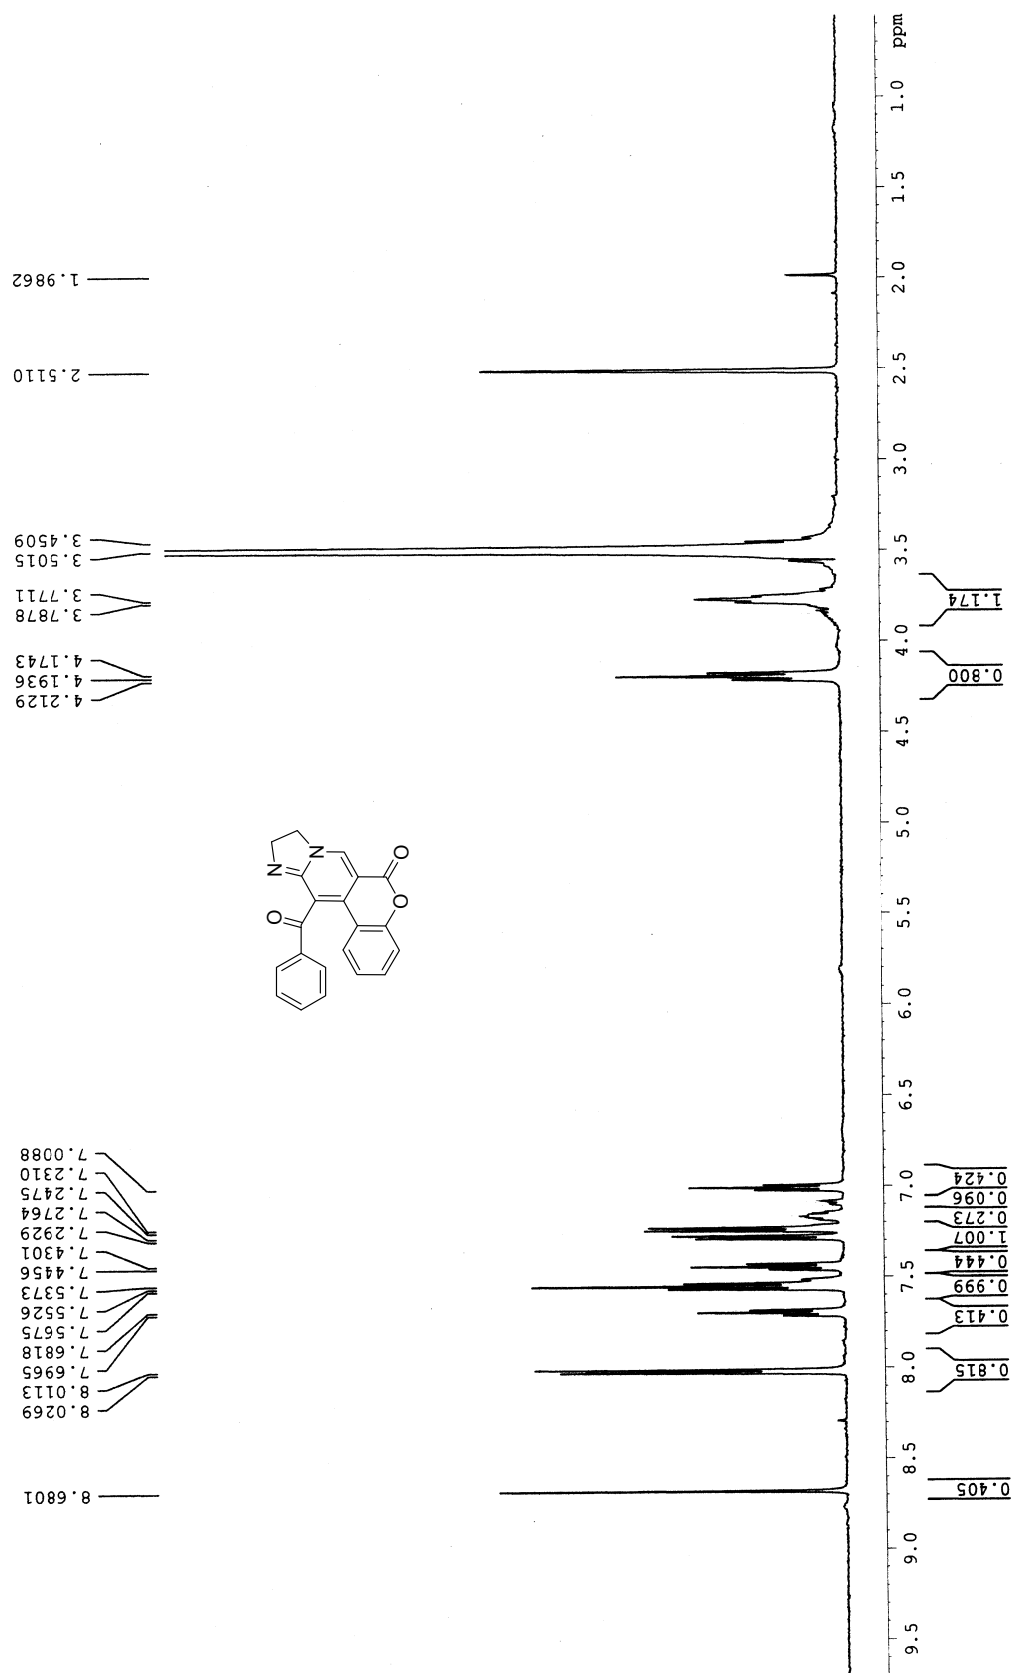

Figure 7. <sup>1</sup>H NMR (500 MHz, DMSO-*d*<sub>6</sub>) spectra of compound 4d

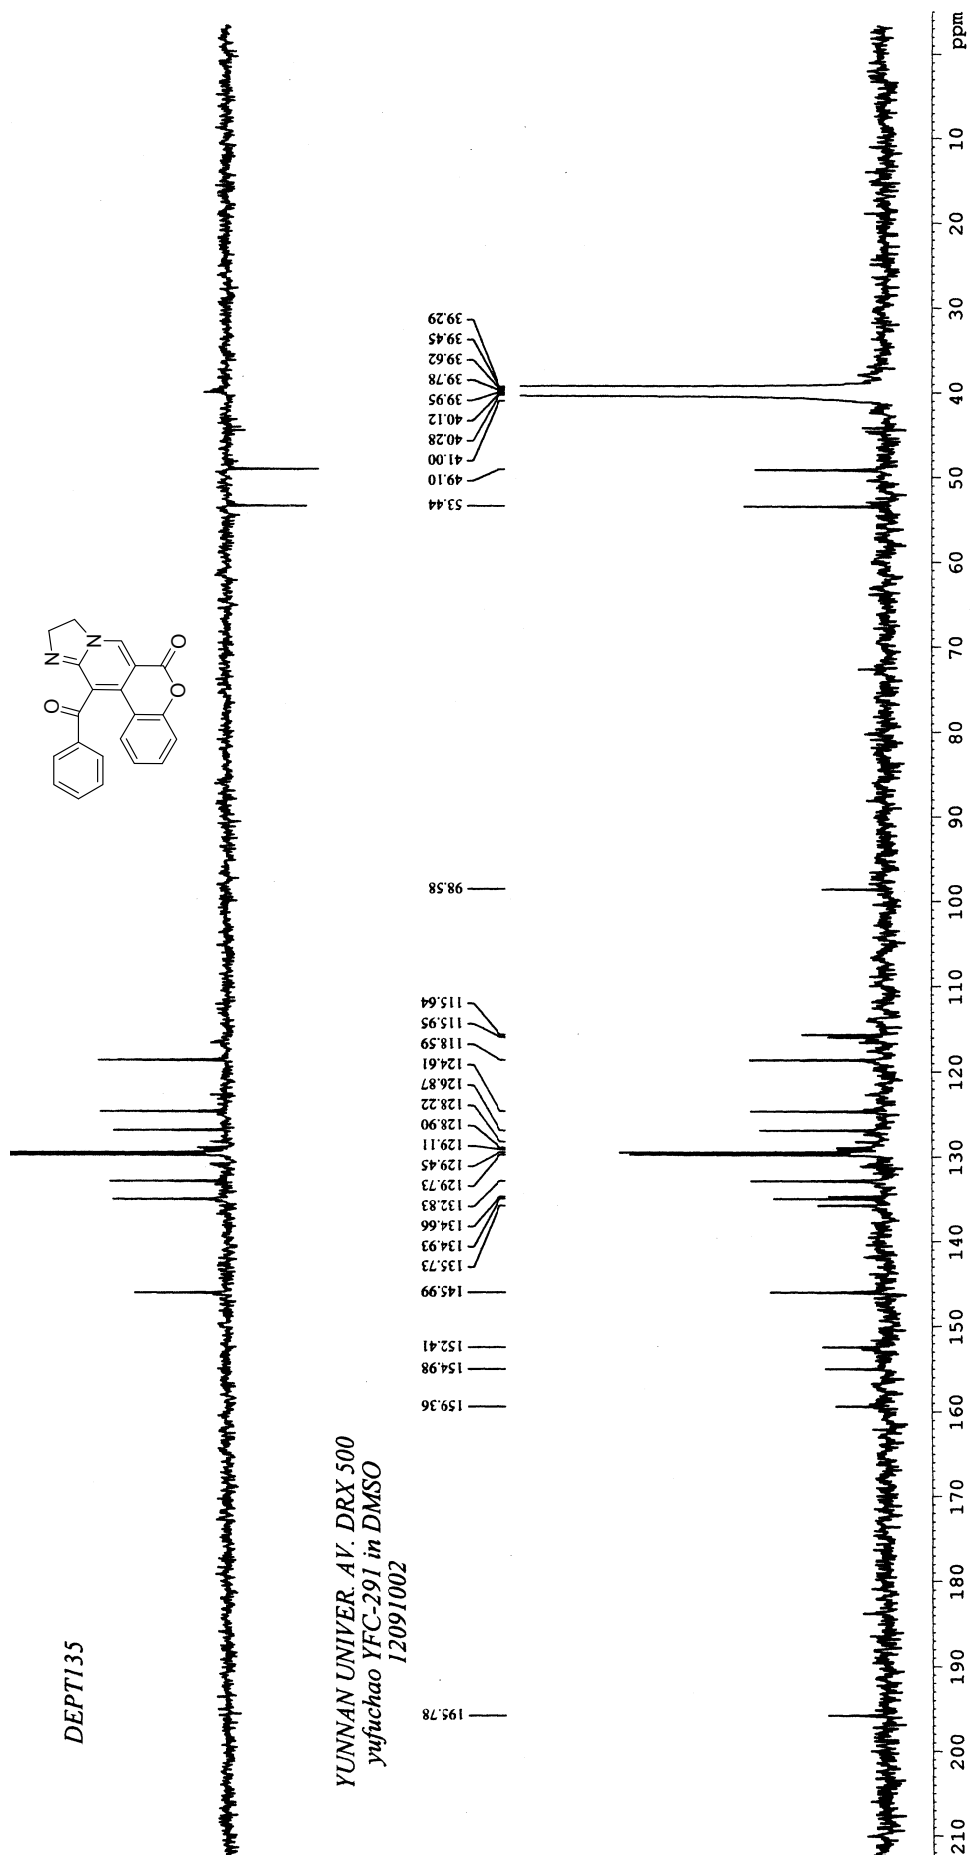

Figure 8. <sup>13</sup>C NMR (125 MHz, DMSO-*d*<sub>6</sub>) spectra of compound 4d

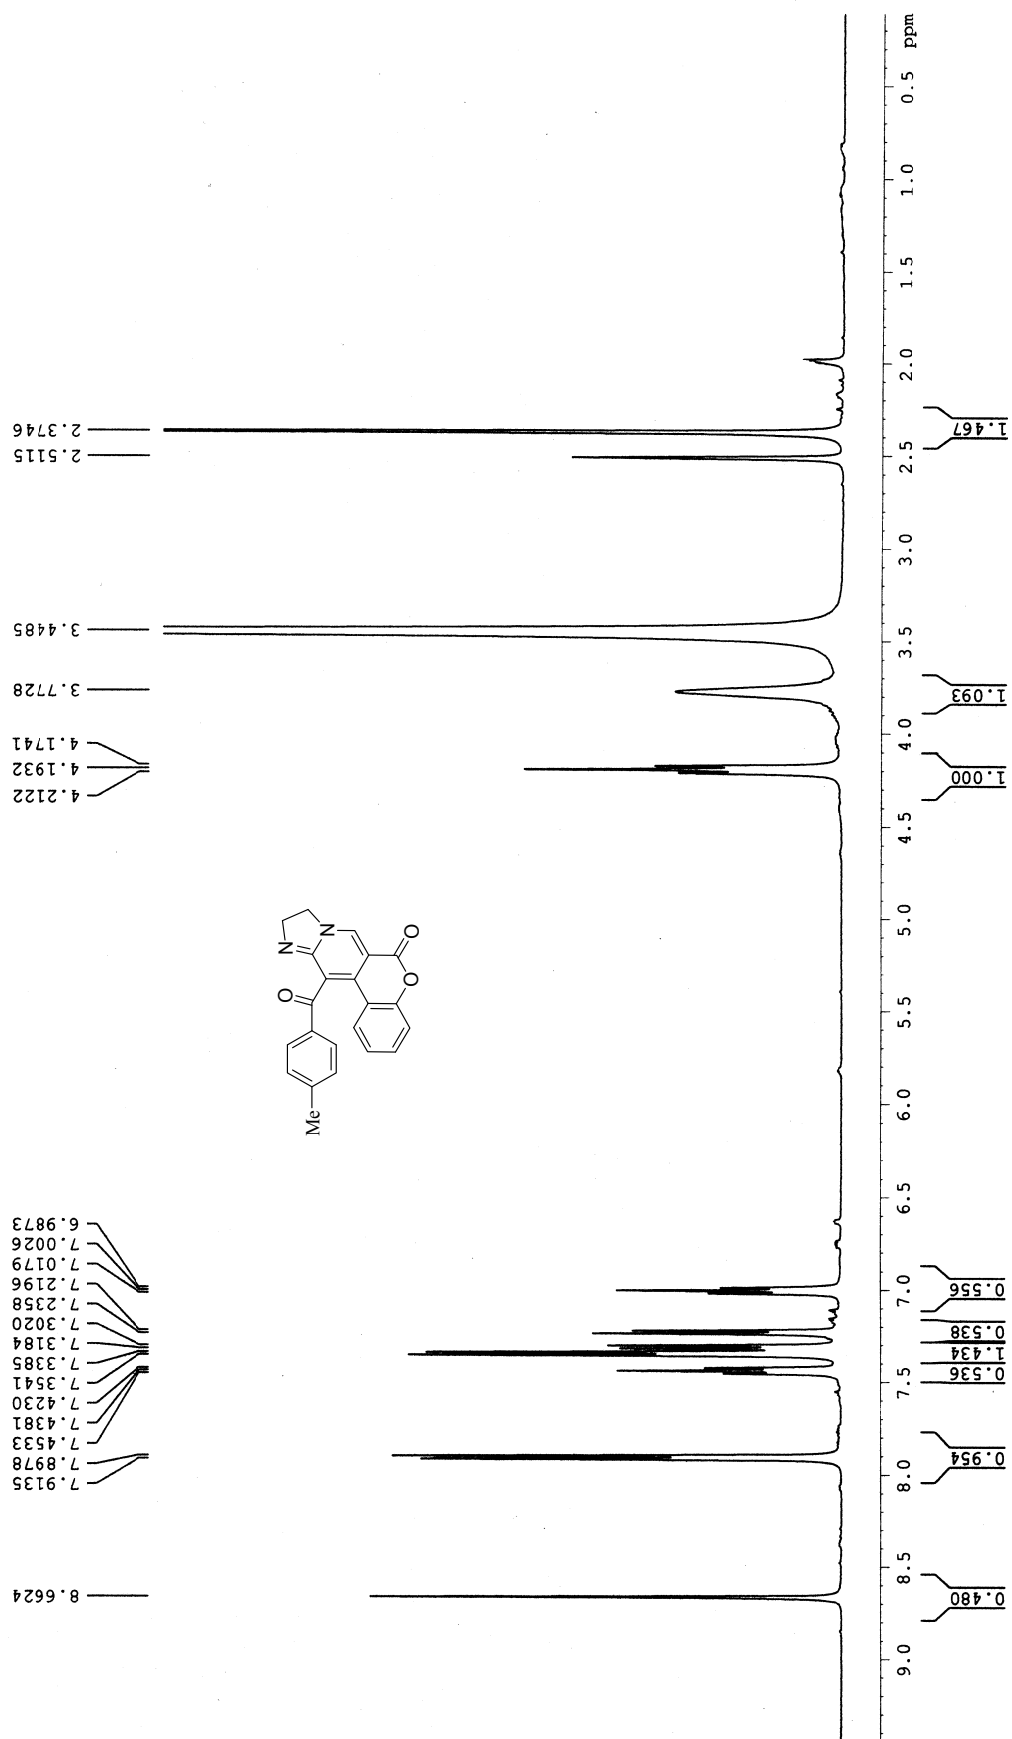

Figure 9. <sup>1</sup>H NMR (500 MHz, DMSO-*d*<sub>6</sub>) spectra of compound 4e



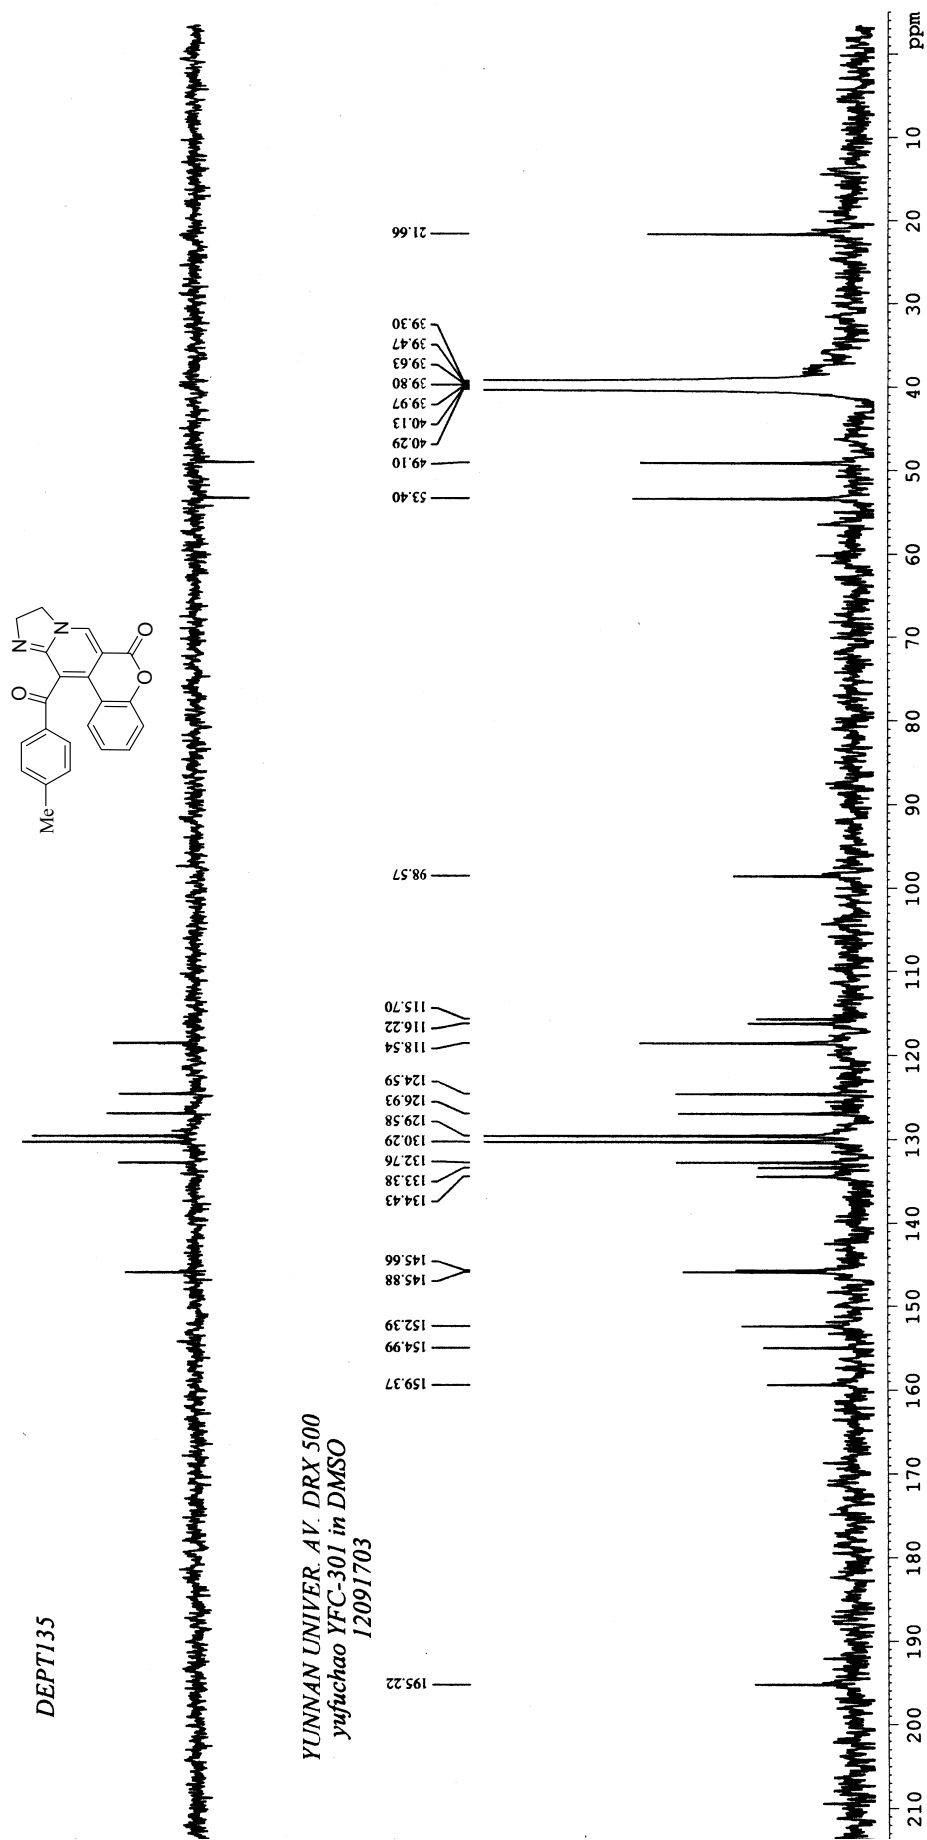

Figure 10.  $^{13}\text{C}$  NMR (125 MHz,  $\text{DMSO-}d_6$ ) spectra of compound 4e

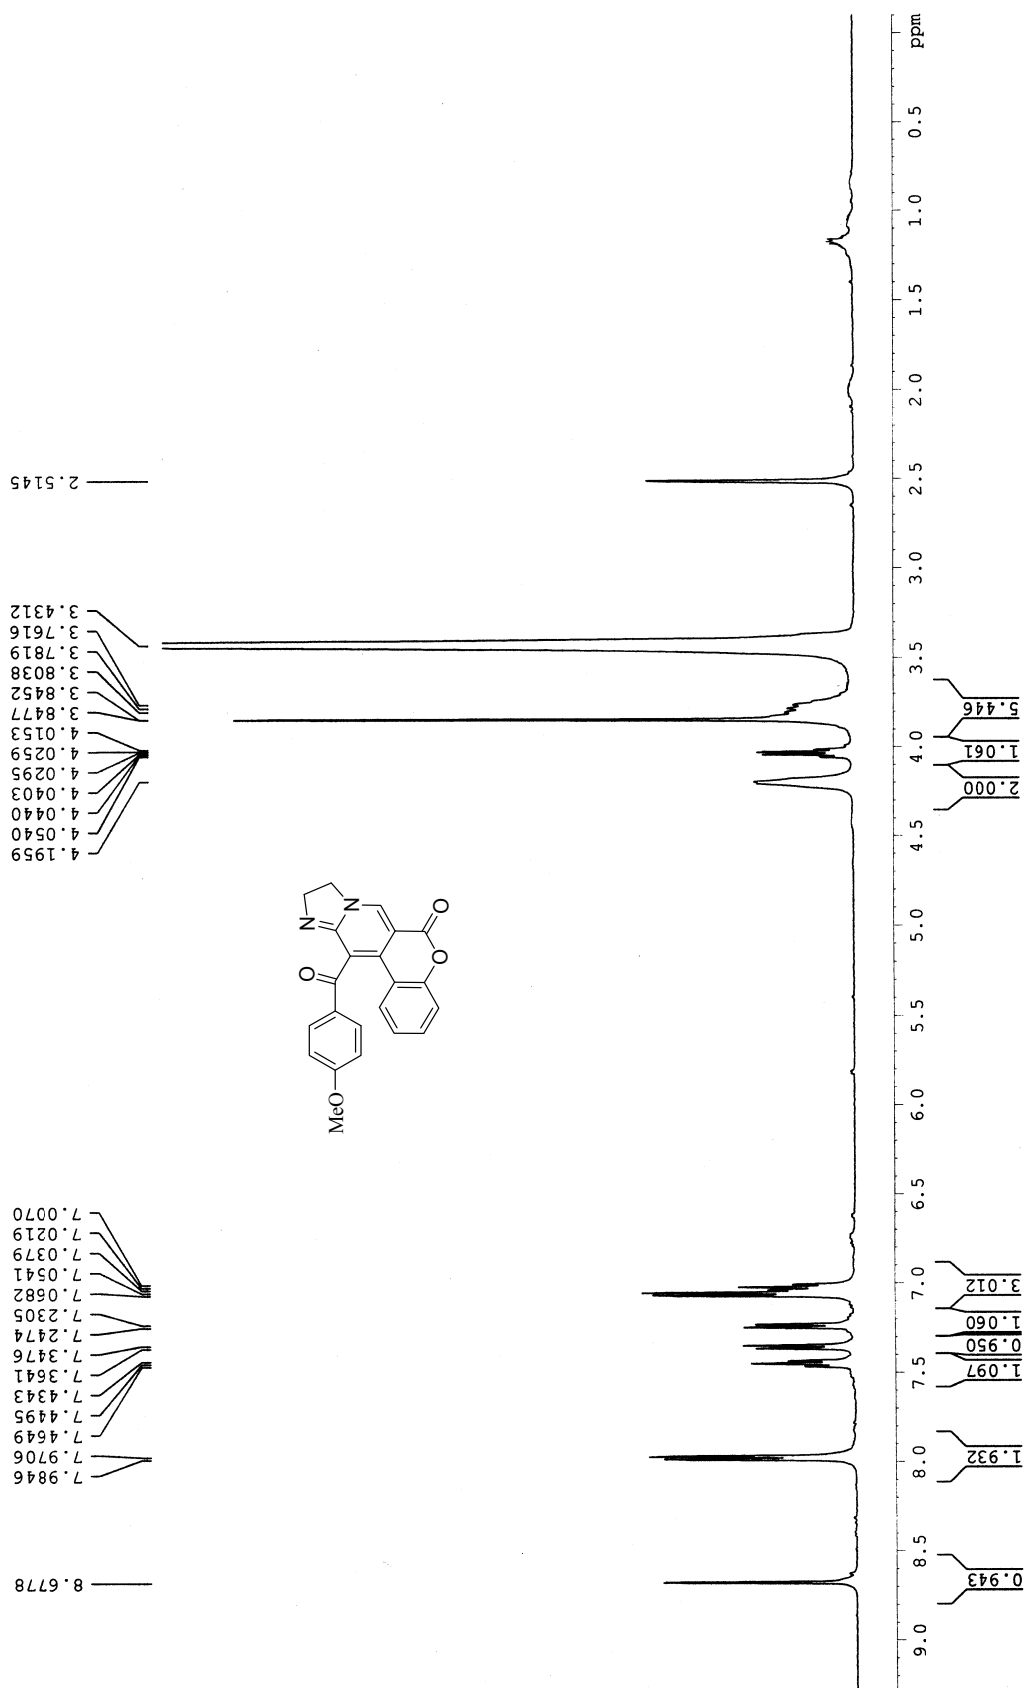

Figure 11. <sup>1</sup>H NMR (500 MHz, DMSO-*d*<sub>6</sub>) spectra of compound 4f

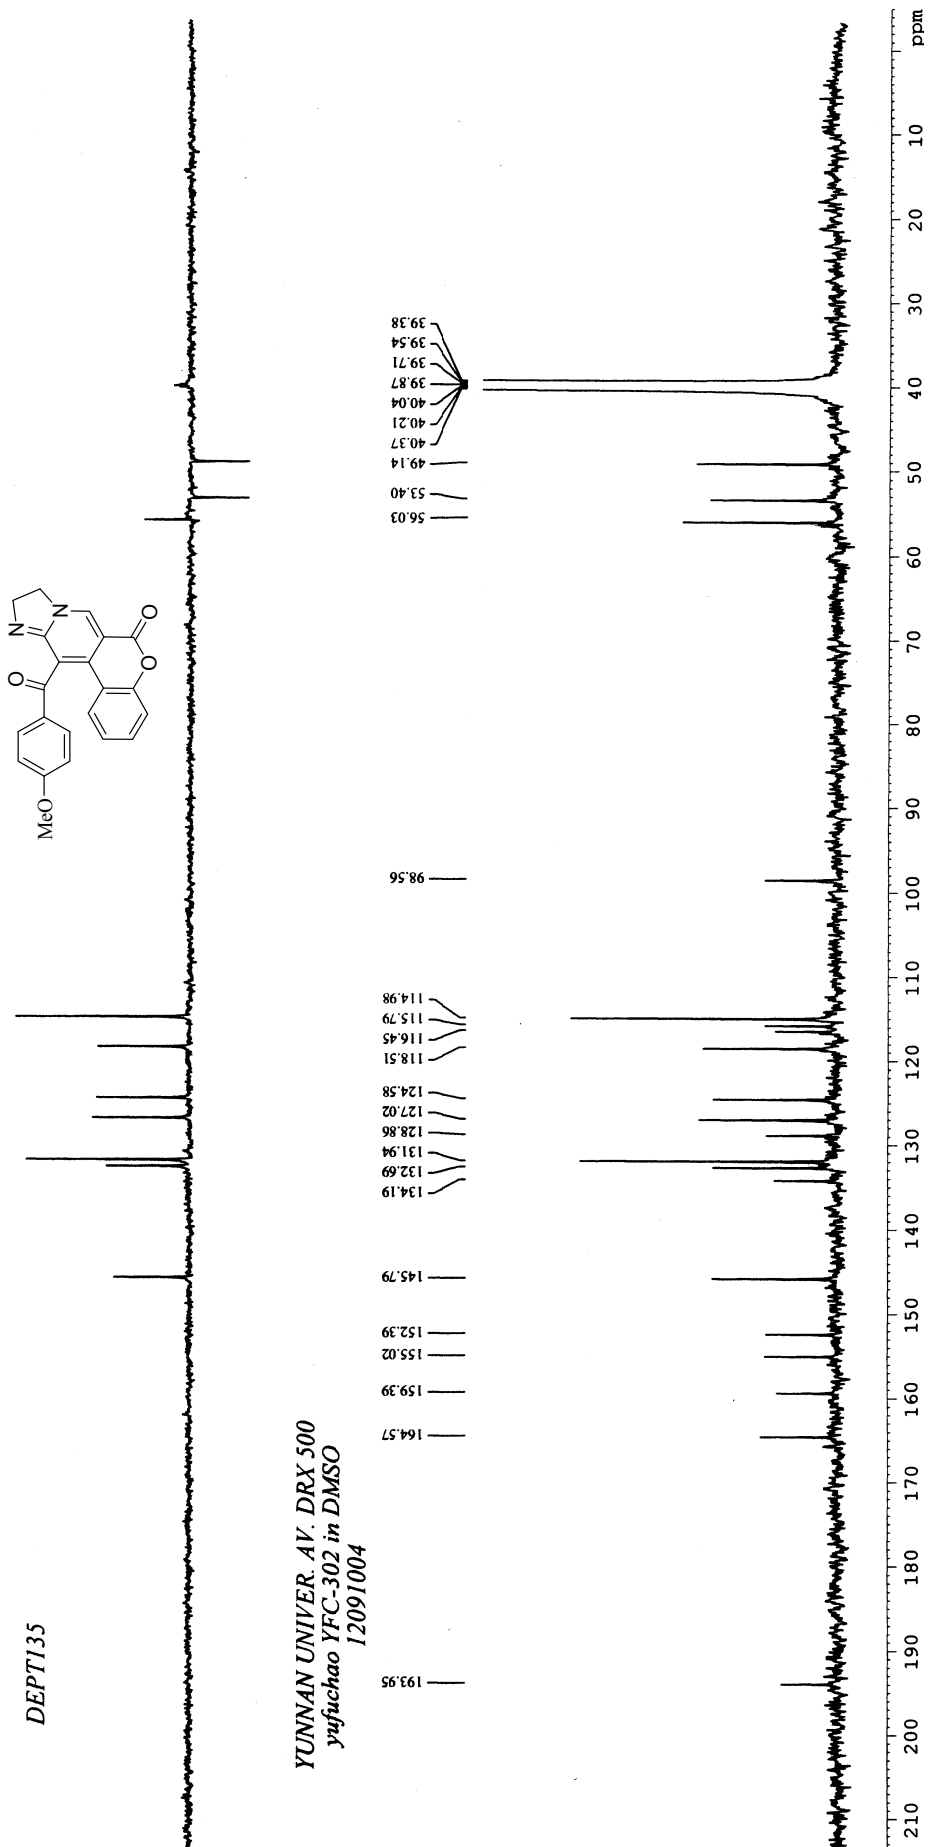

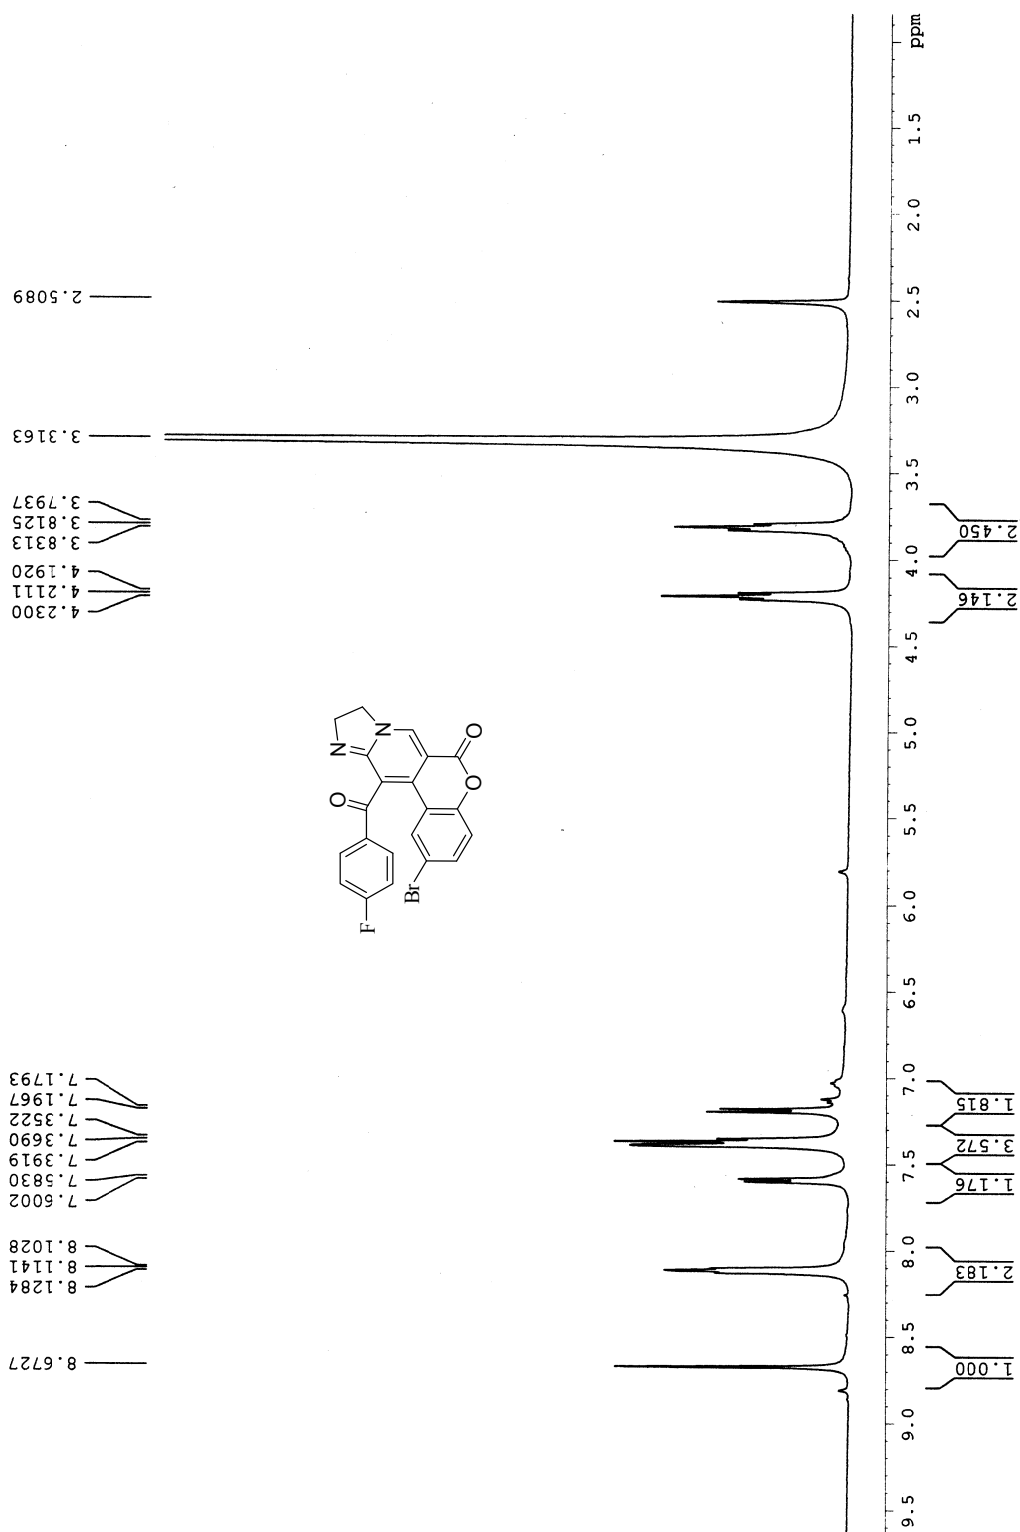

**Figure 13.** <sup>1</sup>H NMR (500 MHz, DMSO-*d*<sub>6</sub>+CDCl<sub>3</sub>) spectra of compound 4g

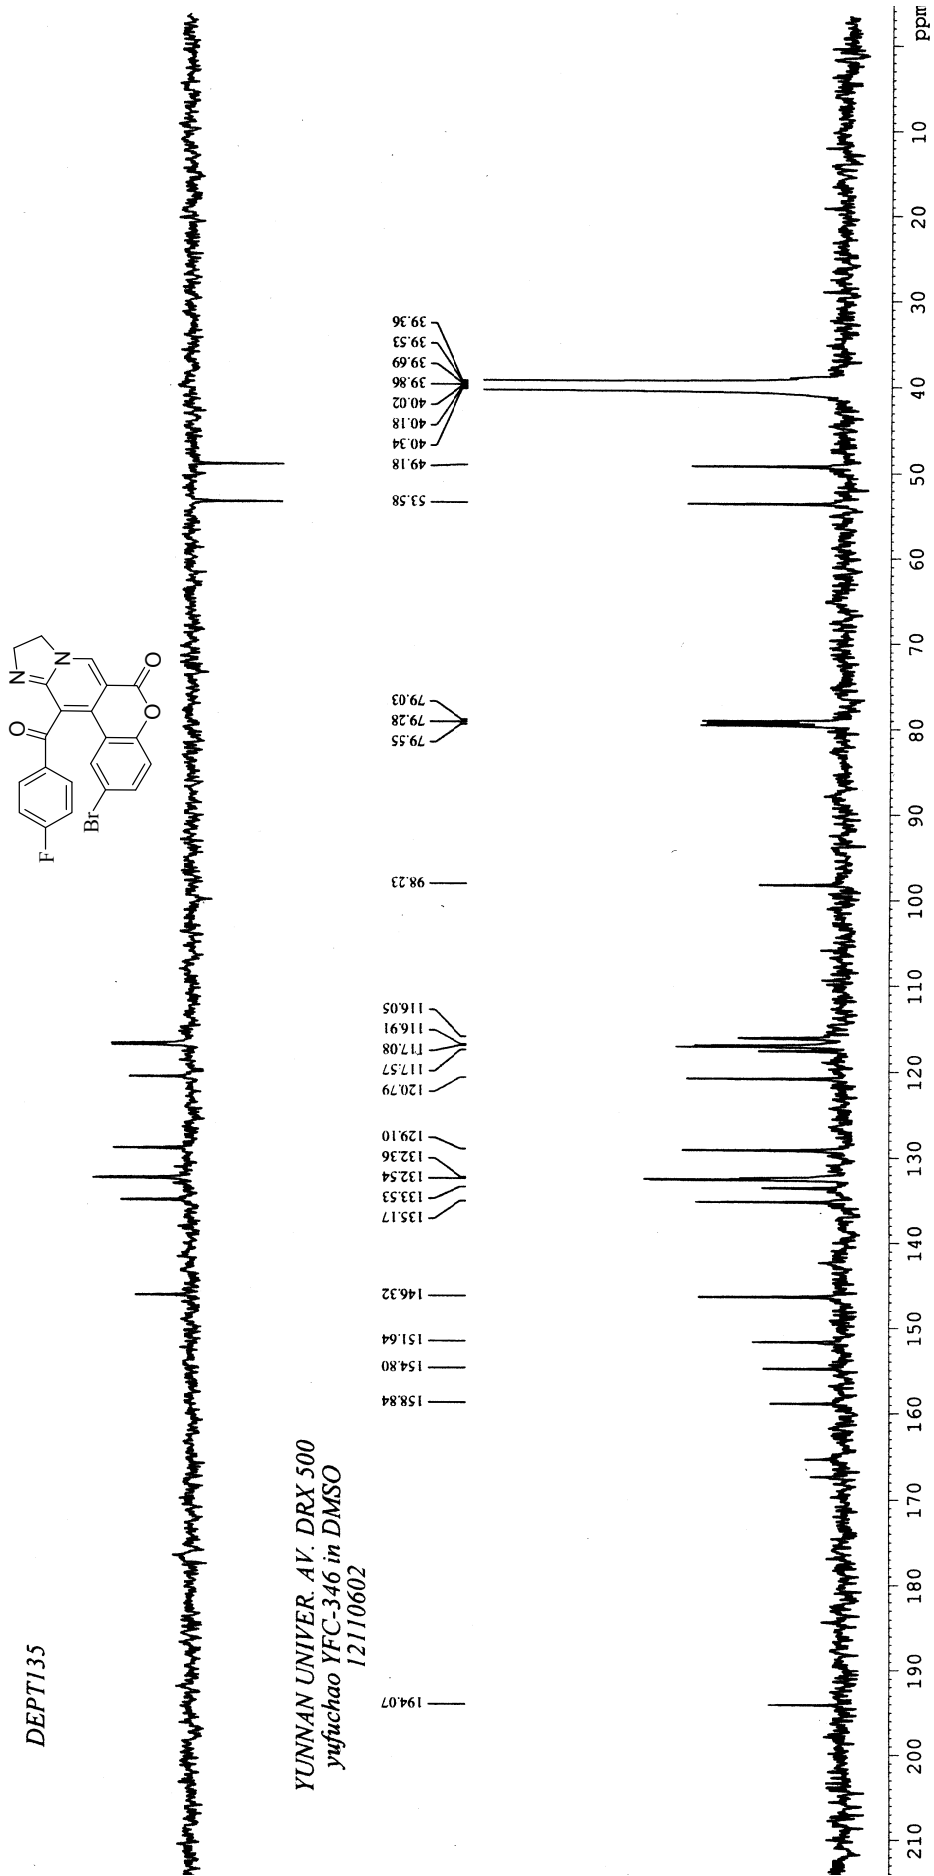

Figure 14.  $^{13}\text{C}$  NMR (125 MHz,  $\text{DMSO-}d_6 + \text{CDCl}_3$ ) spectra of compound 4g

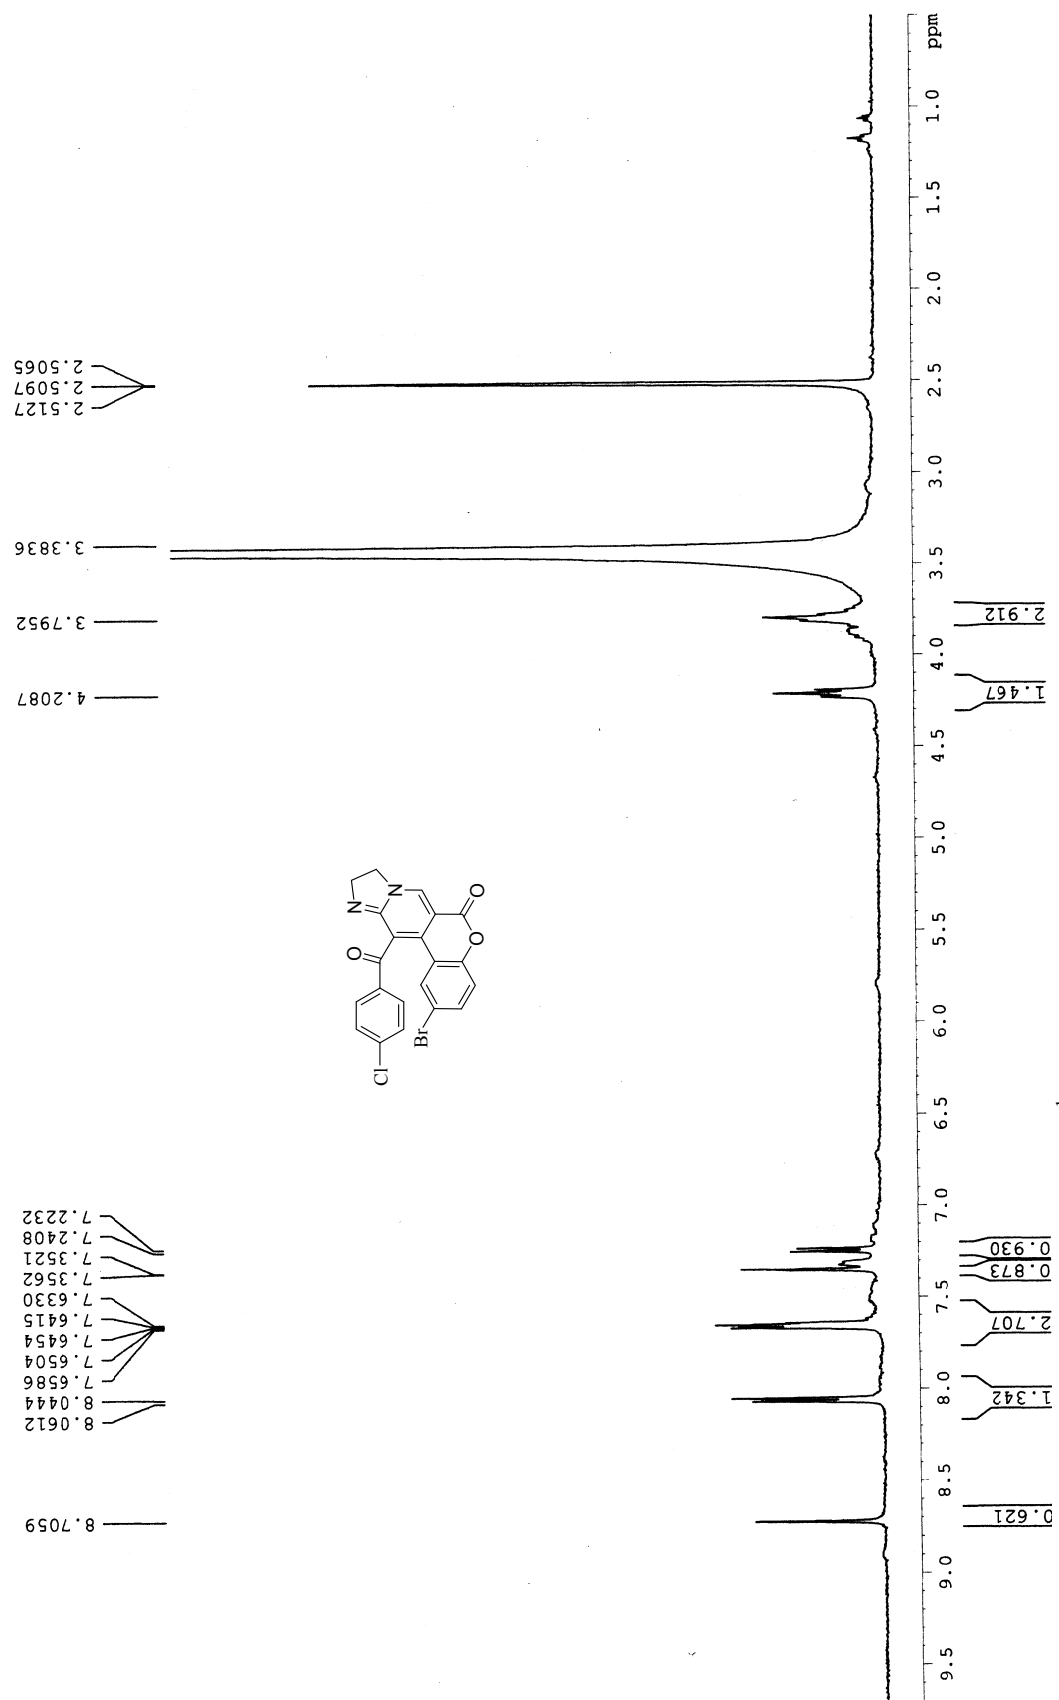

Figure 15. <sup>1</sup>H NMR (500 MHz, DMSO-*d*<sub>6</sub>) spectra of compound 4h

DEPT135

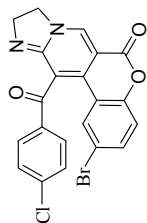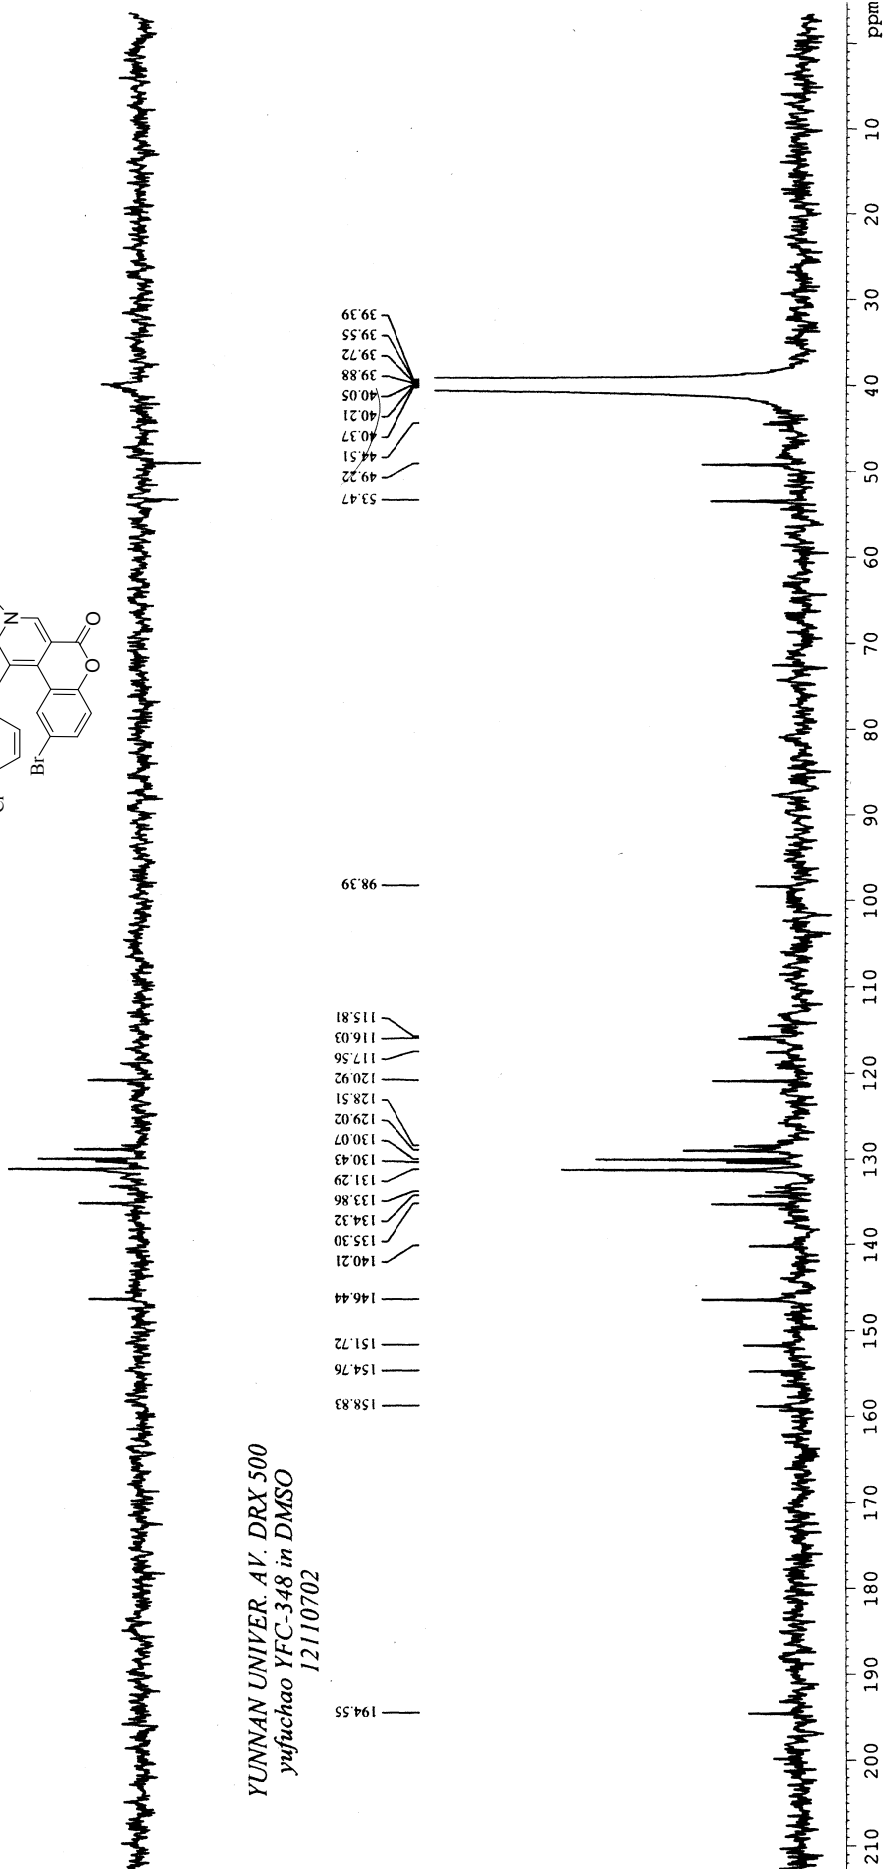

Figure 16.  $^{13}\text{C}$  NMR (125 MHz,  $\text{DMSO-}d_6$ ) spectra of compound 4h

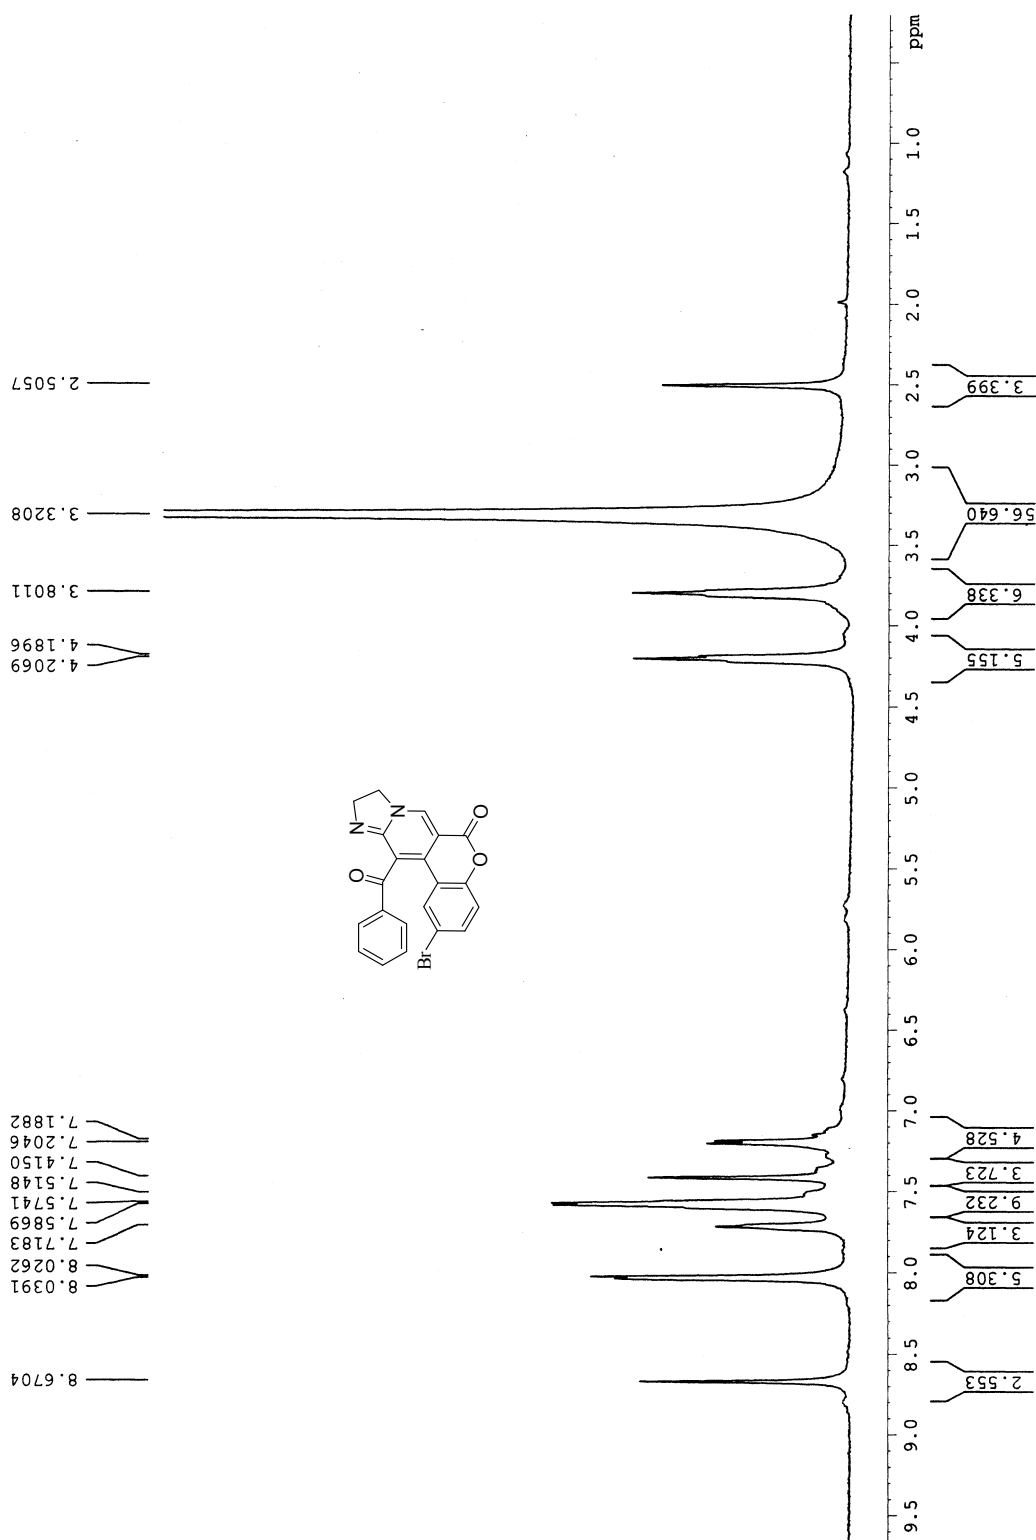

**Figure 17.** <sup>1</sup>H NMR (500 MHz, DMSO-*d*<sub>6</sub>) spectra of compound **4i**



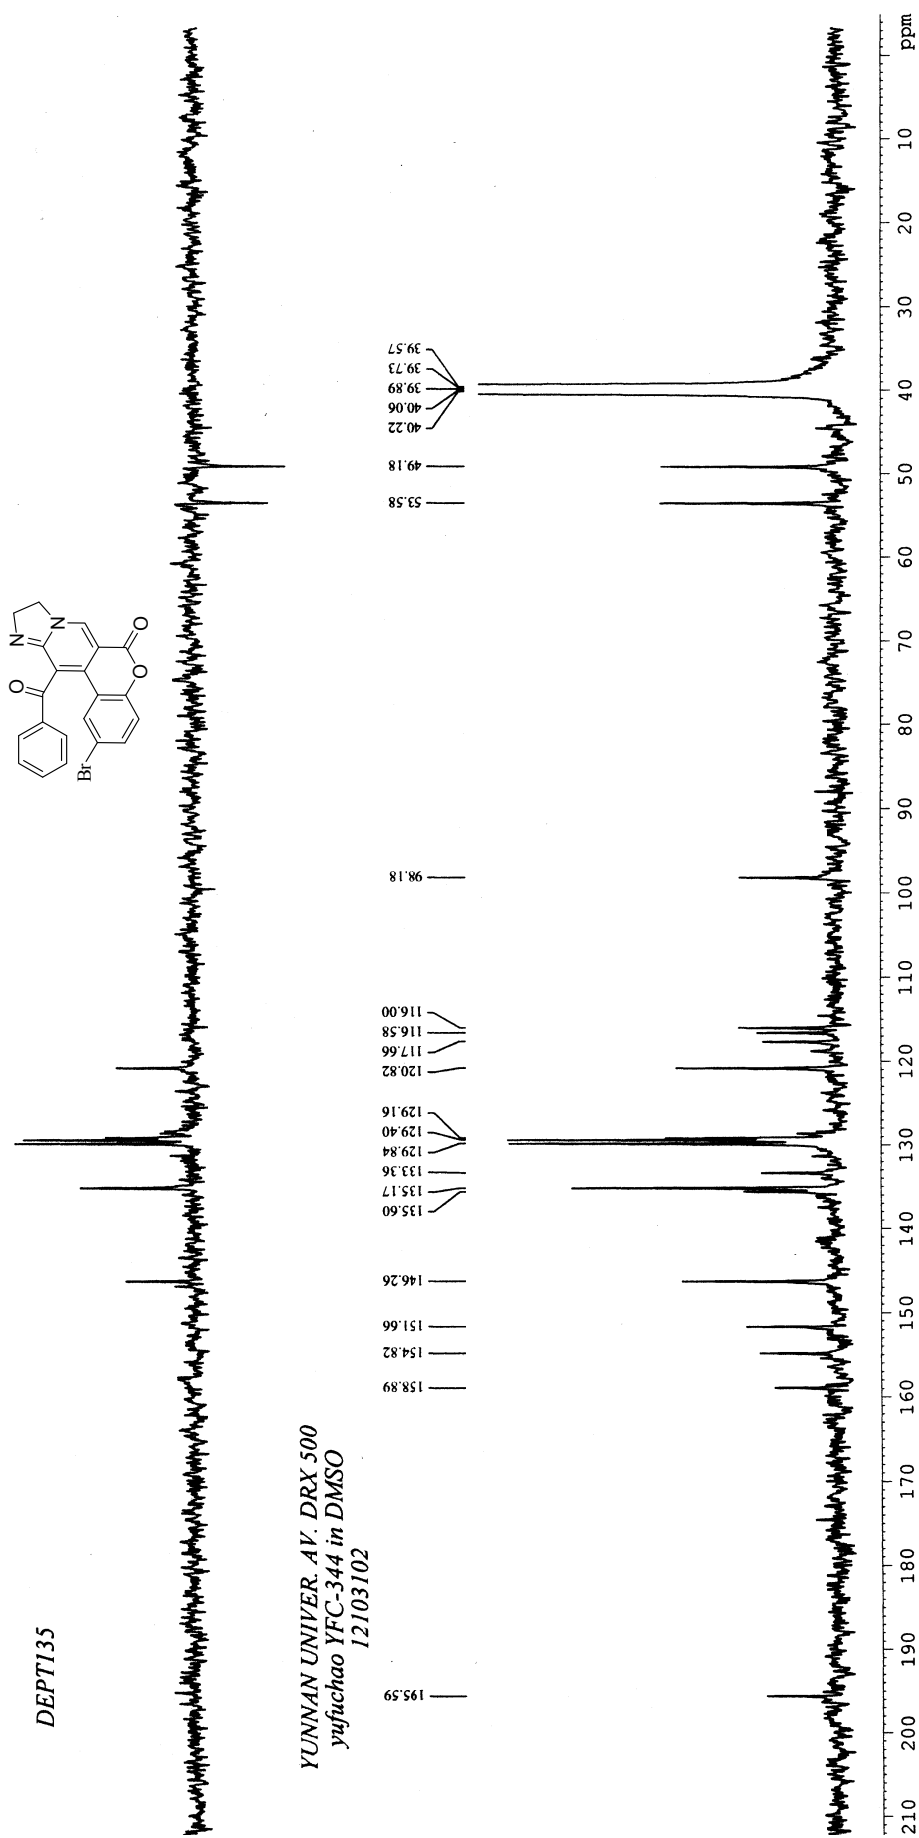

Figure 18.  $^{13}\text{C}$  NMR (125 MHz,  $\text{DMSO-}d_6$ ) spectra of compound 4i

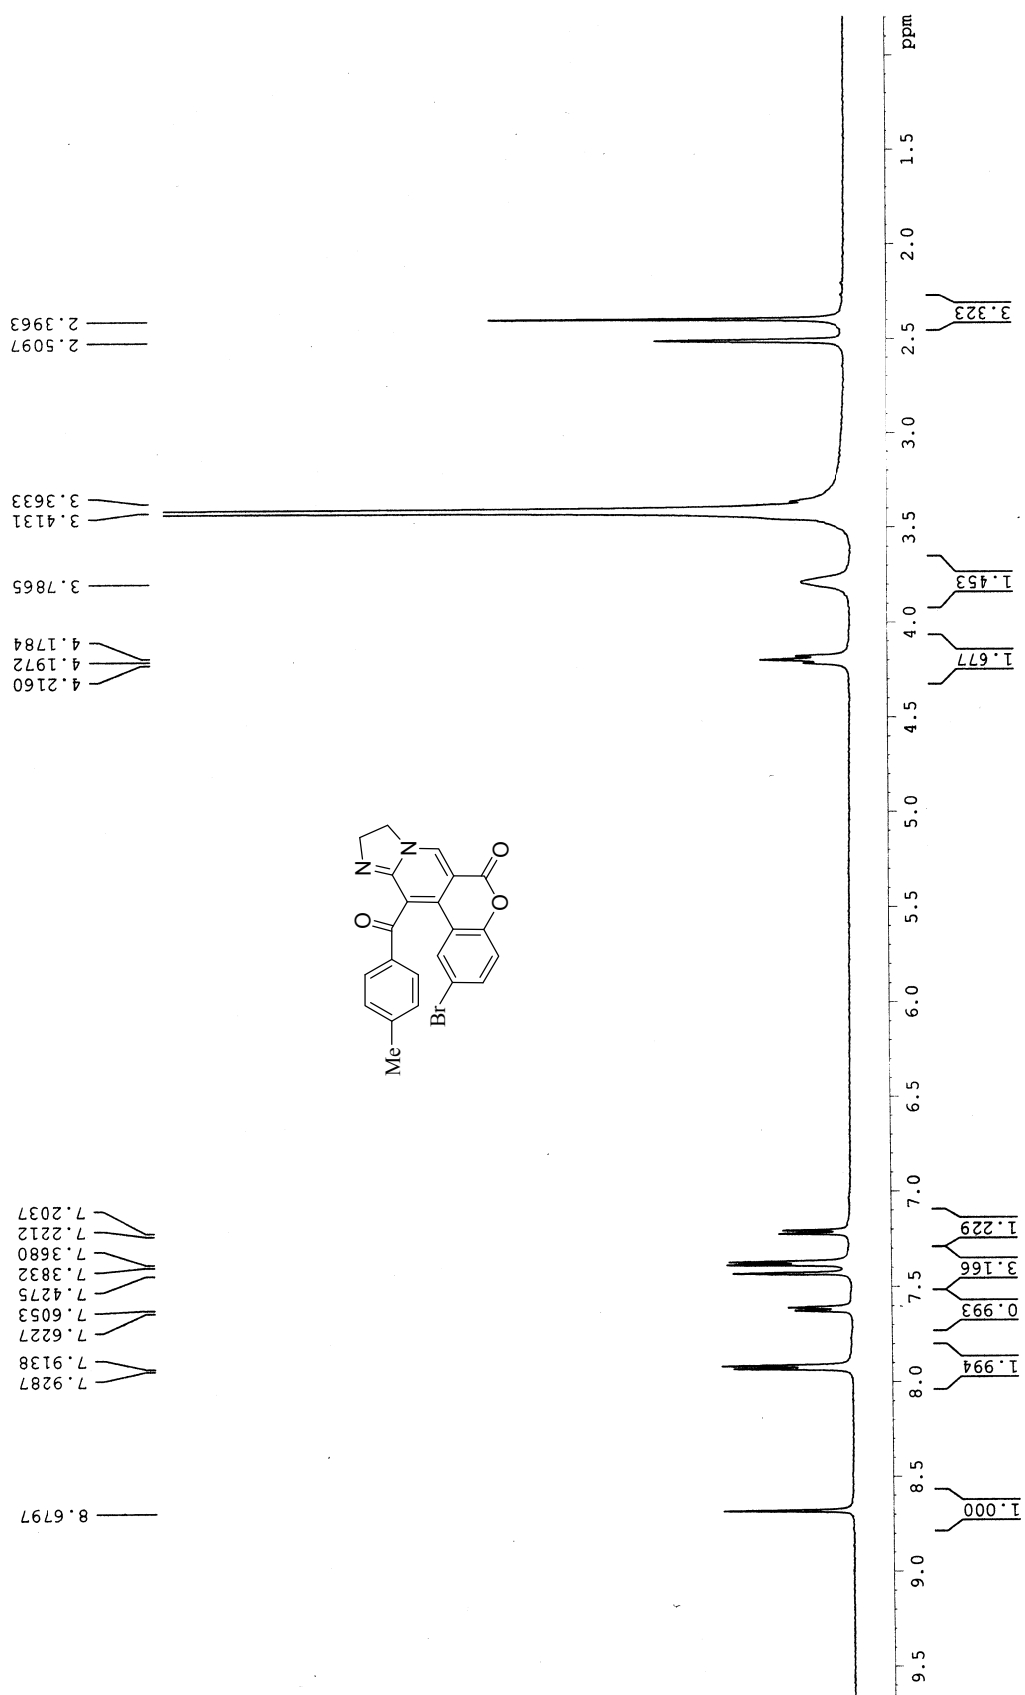

Figure 19. <sup>1</sup>H NMR (500 MHz, DMSO-*d*<sub>6</sub>) spectra of compound 4j

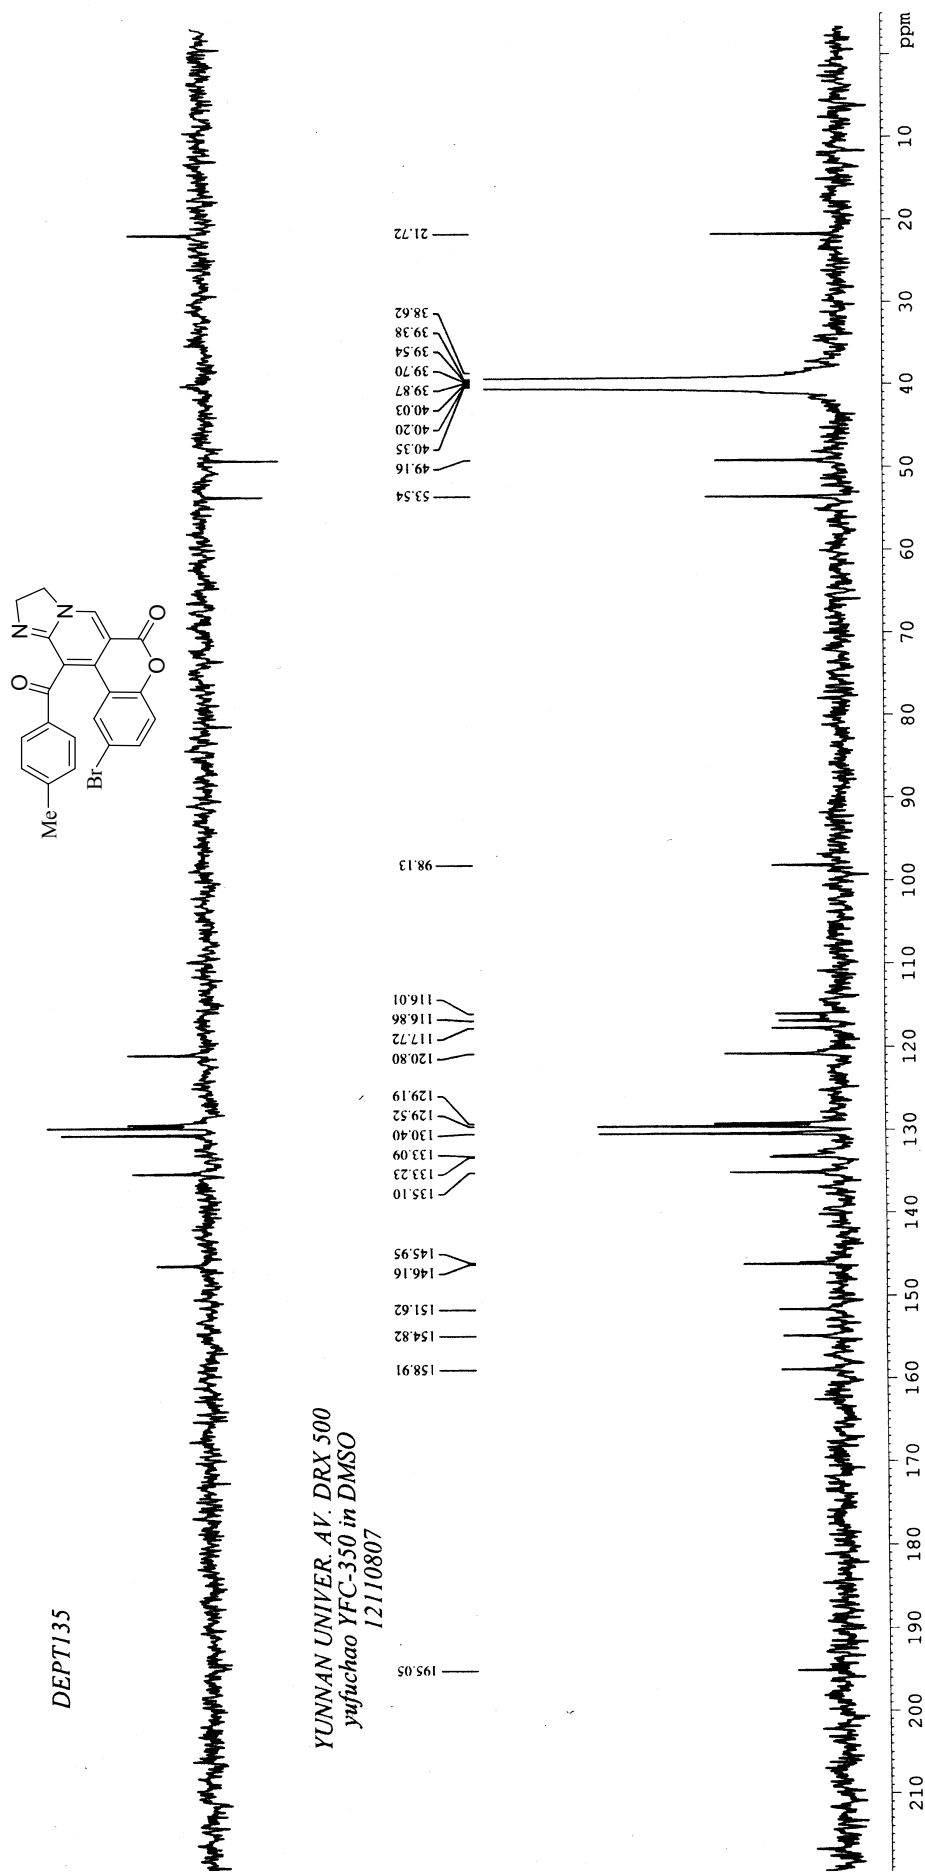

Figure 20.  $^{13}\text{C}$  NMR (125 MHz,  $\text{DMSO-}d_6$ ) spectra of compound 4j

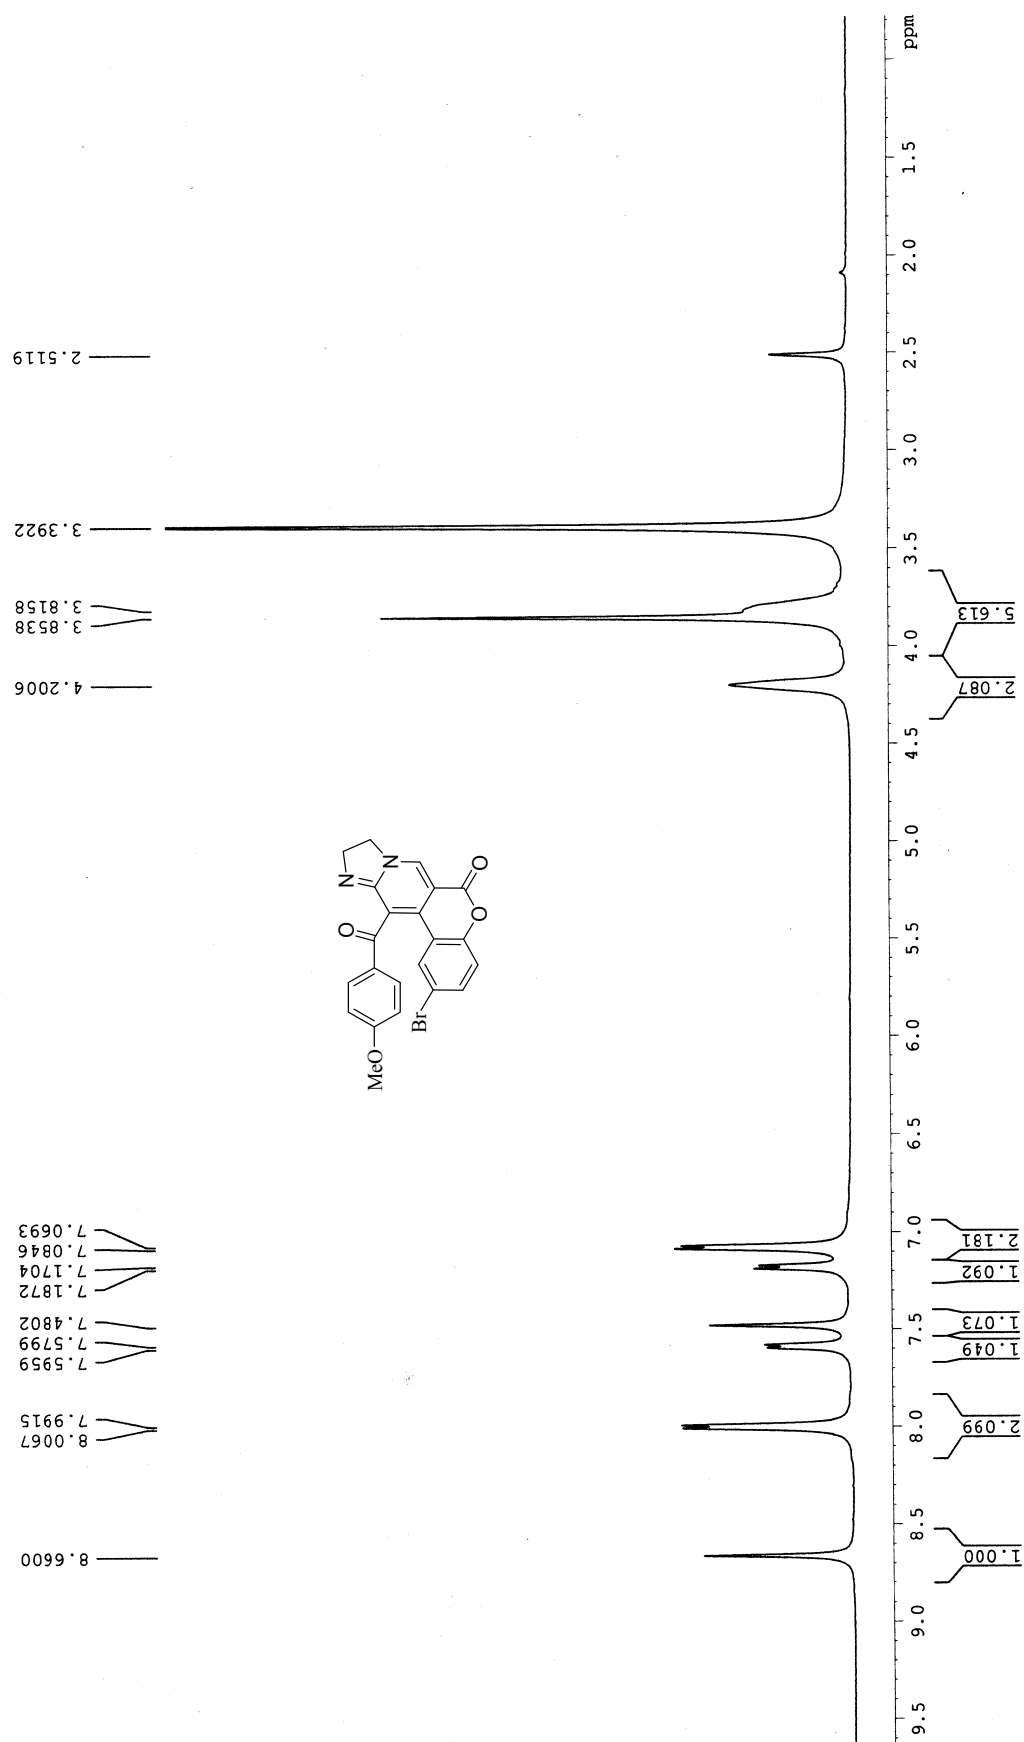

Figure 21. <sup>1</sup>H NMR (500 MHz, DMSO-*d*<sub>6</sub>) spectra of compound 4k

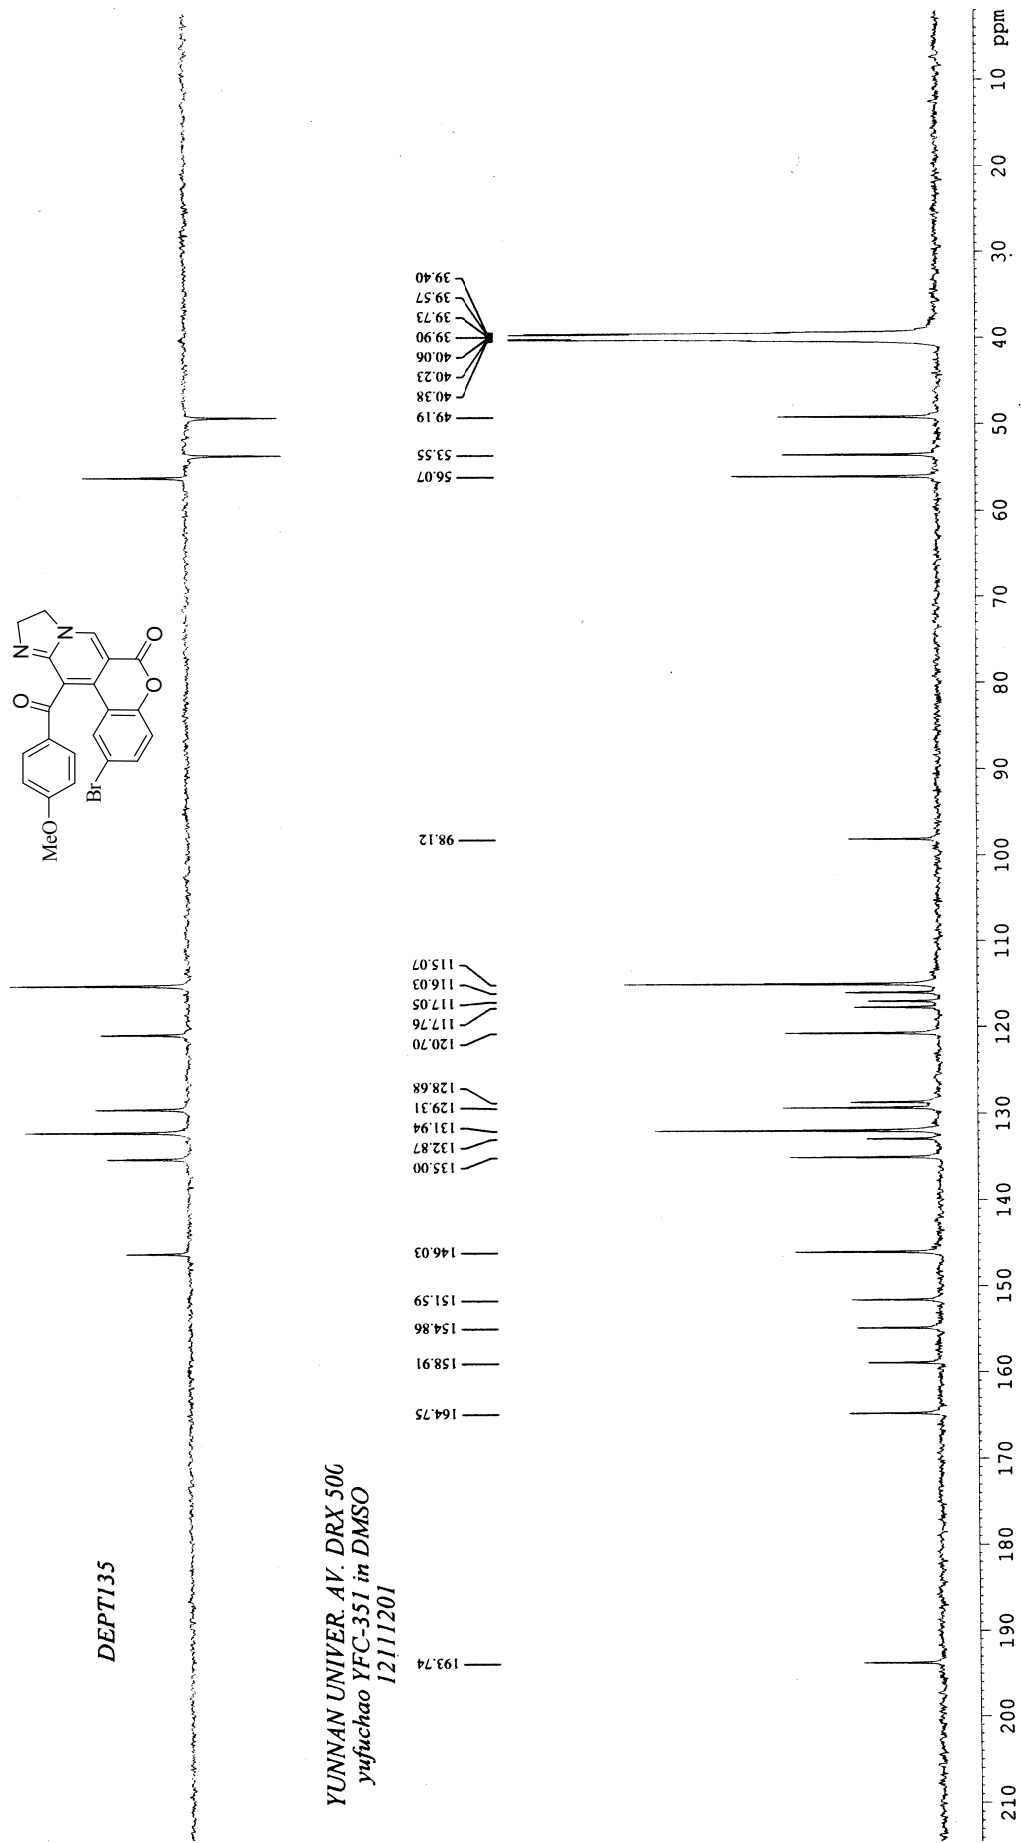

**Figure 22.**  $^{13}\text{C}$  NMR (125 MHz,  $\text{DMSO-}d_6$ ) spectra of compound **4k**

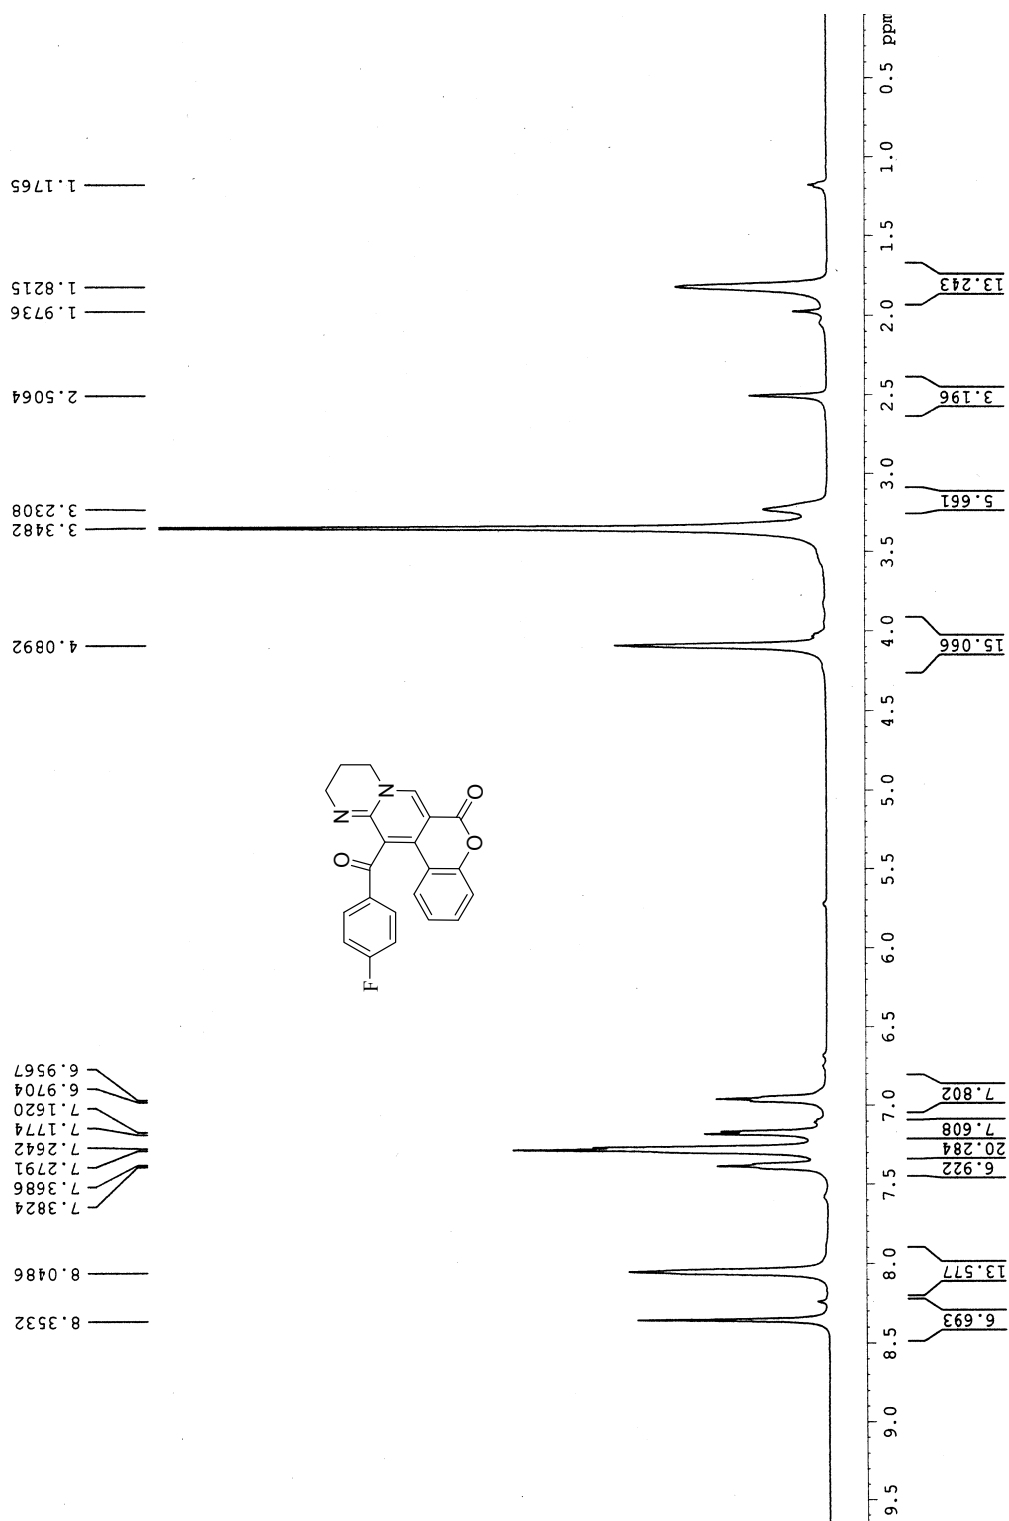

Figure 23. <sup>1</sup>H NMR (500 MHz, DMSO-*d*<sub>6</sub>) spectra of compound 41

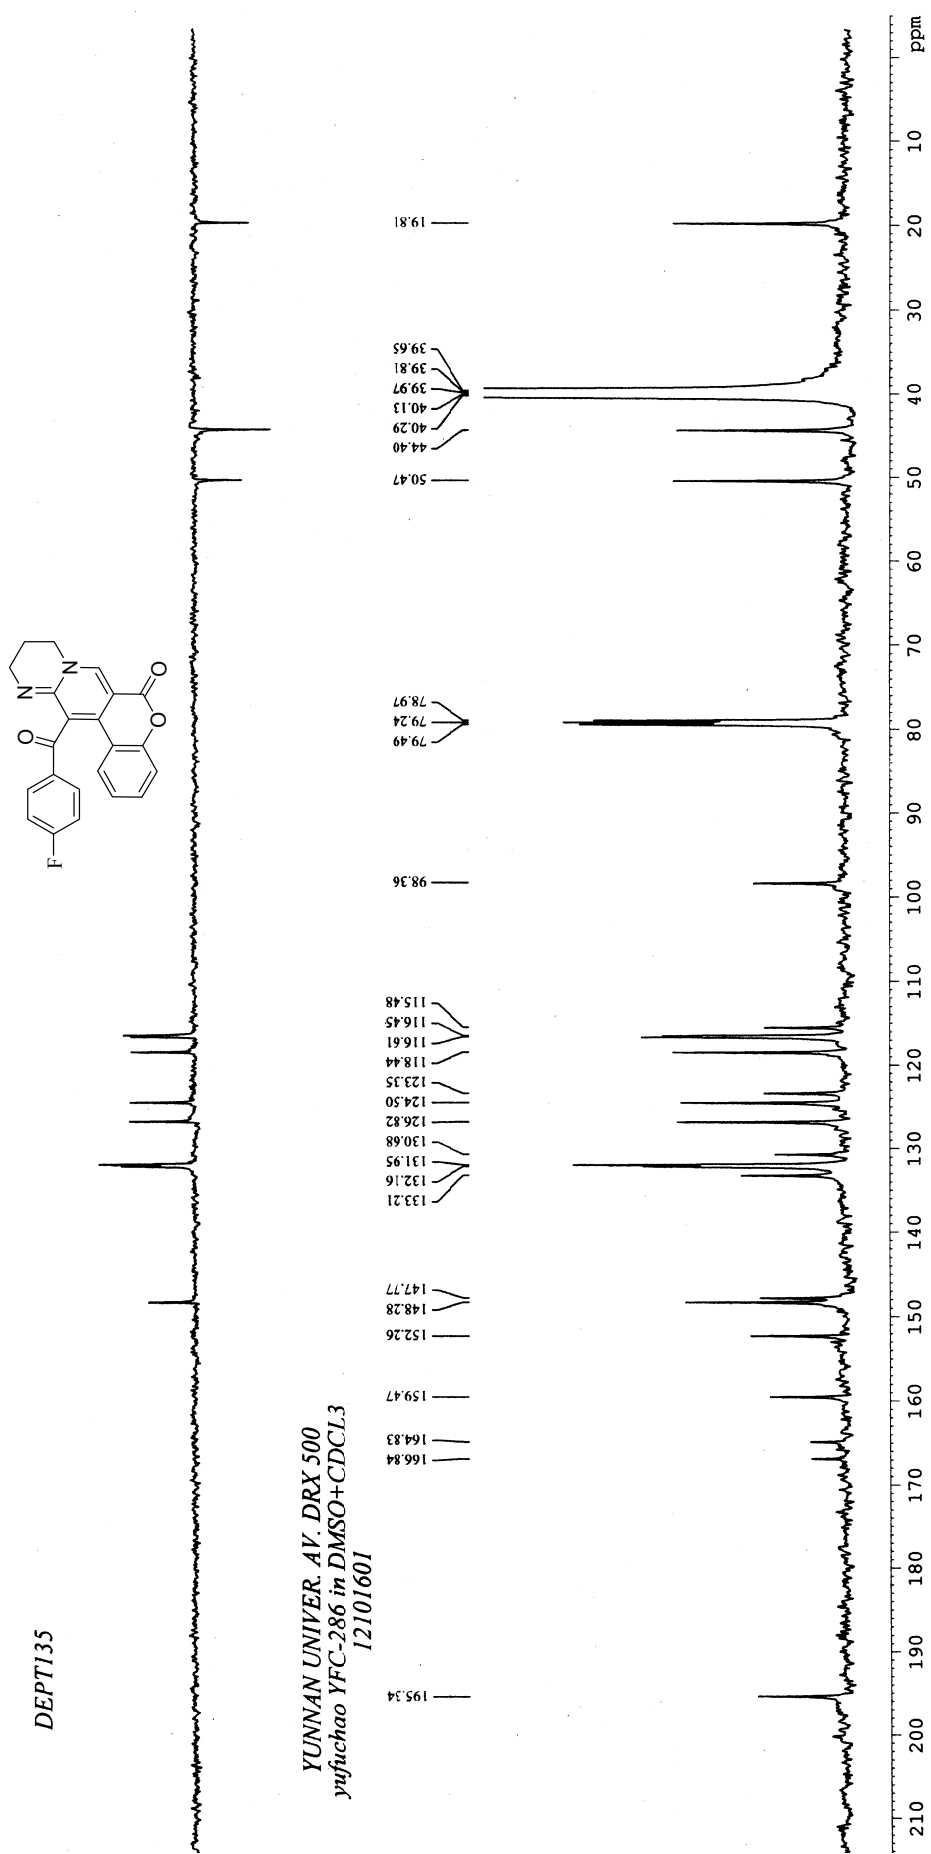

Figure 24. <sup>13</sup>C NMR (125 MHz, DMSO-*d*<sub>6</sub>) spectra of compound 4I

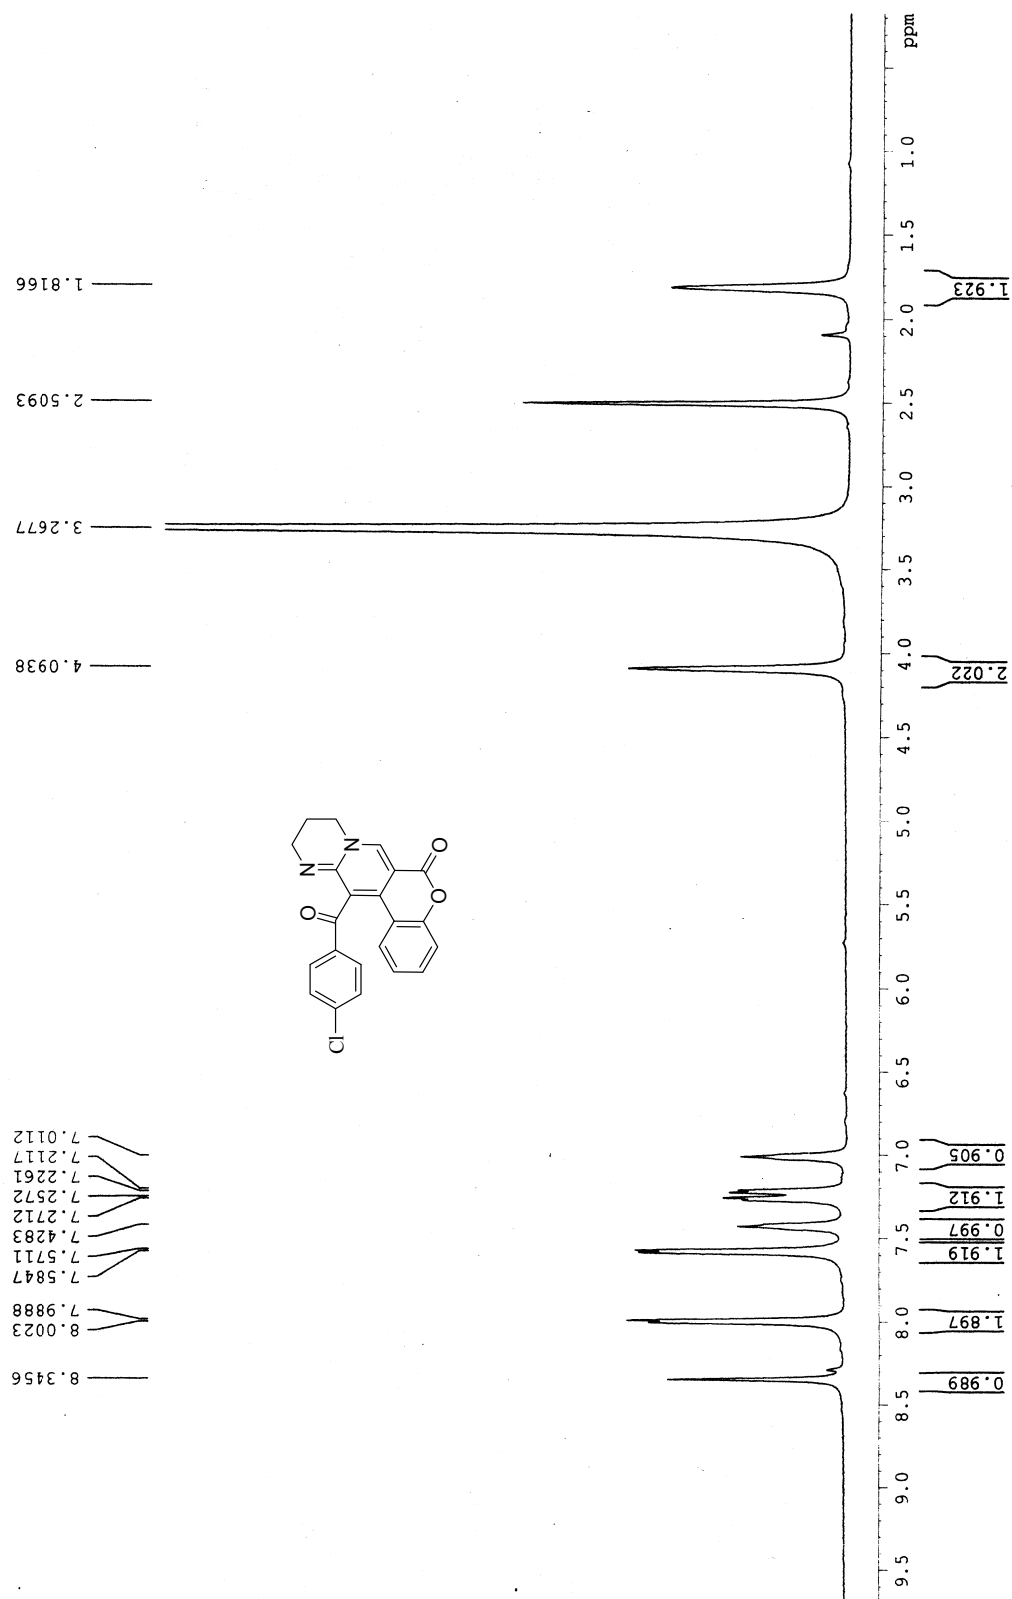

Figure 25. <sup>1</sup>H NMR (500 MHz, DMSO-*d*<sub>6</sub>) spectra of compound 4m



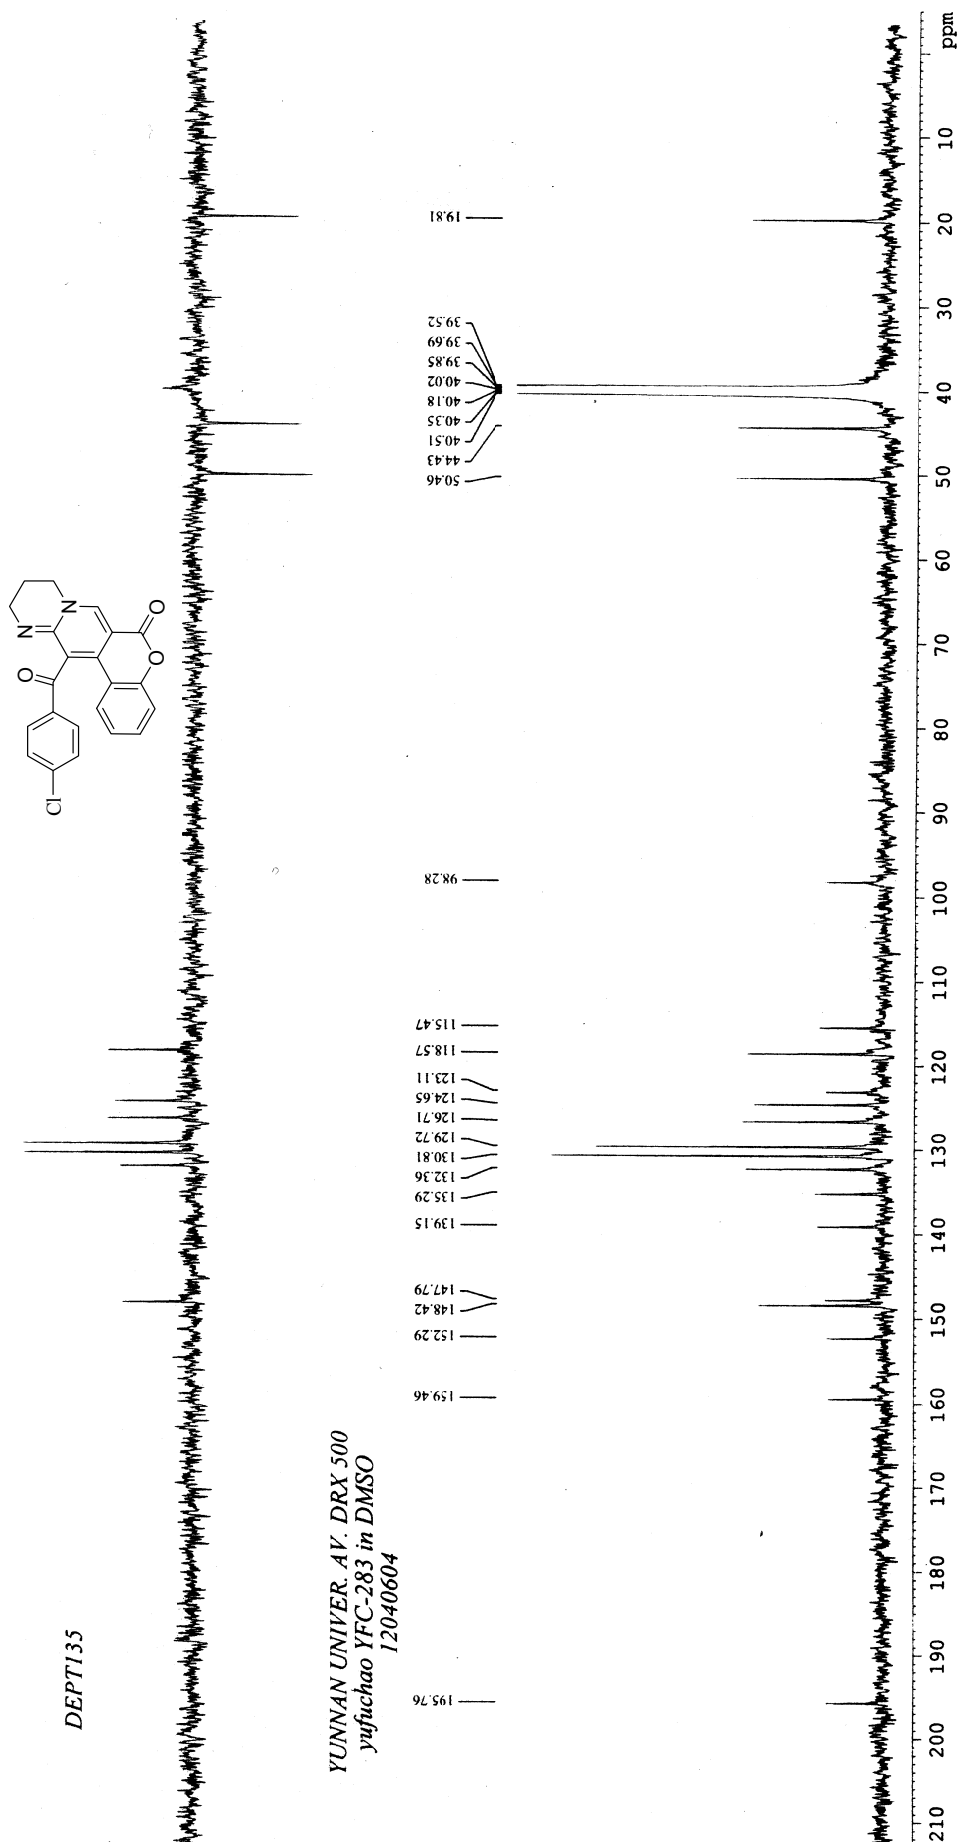

Figure 26.  $^{13}\text{C}$  NMR (125 MHz,  $\text{DMSO-}d_6$ ) spectra of compound 4m

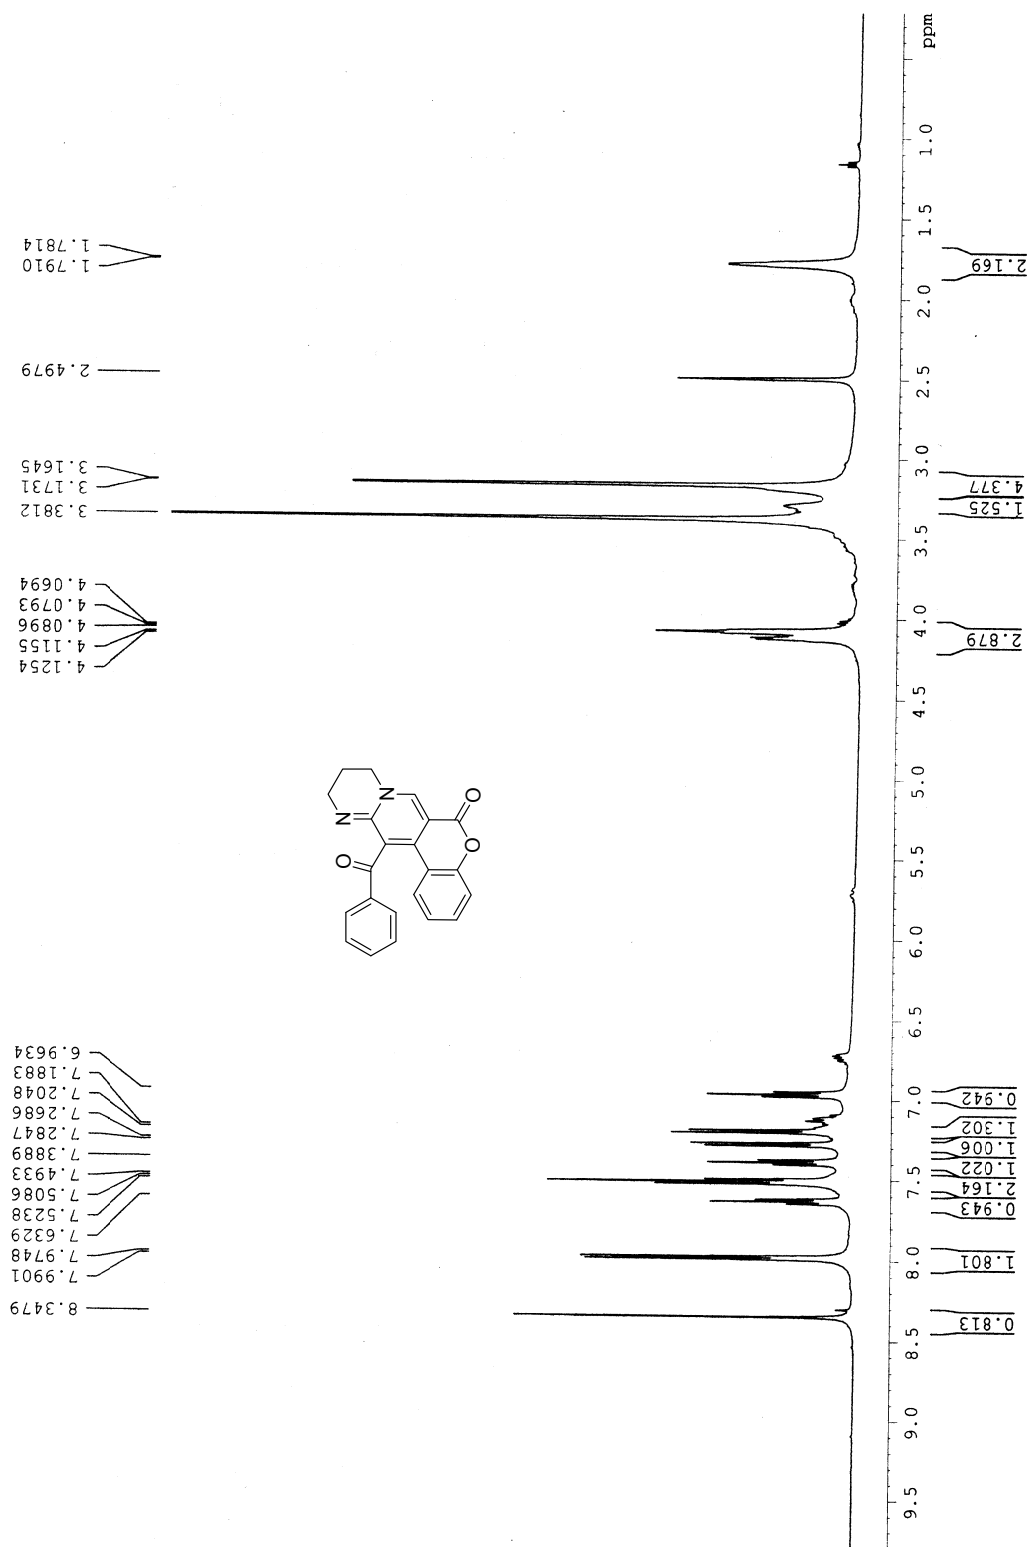

Figure 27. <sup>1</sup>H NMR (500 MHz, DMSO-*d*<sub>6</sub>) spectra of compound 4n

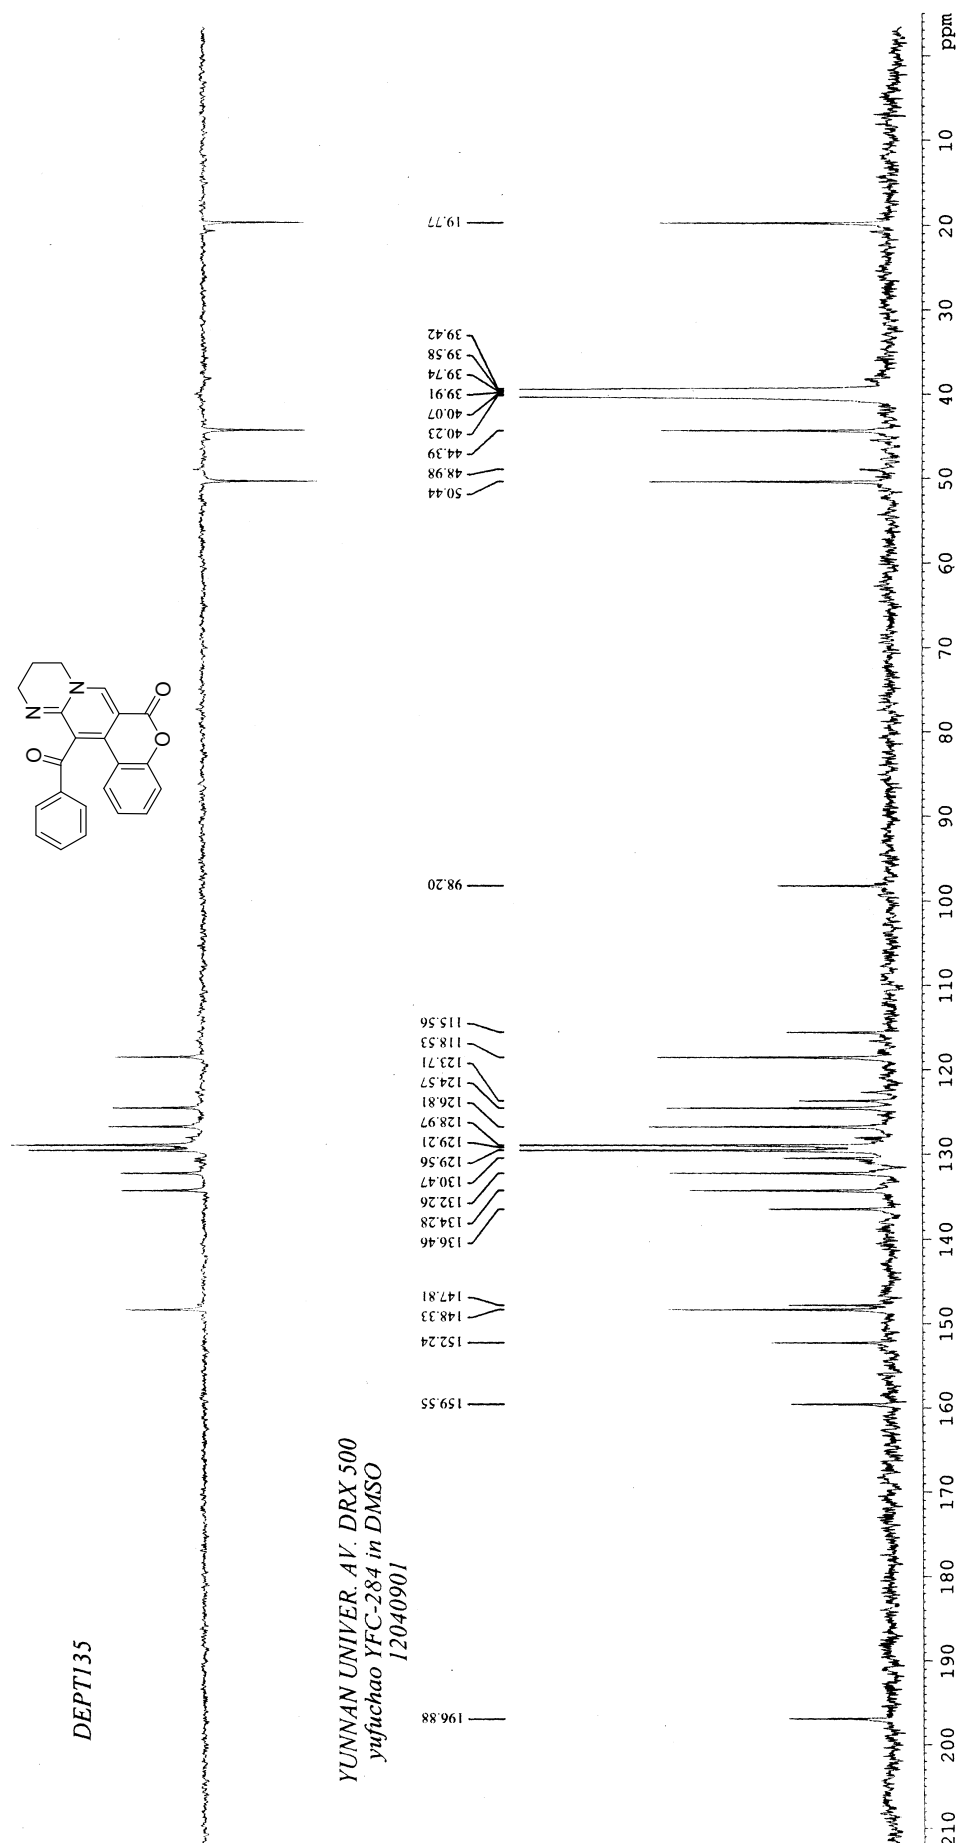

Figure 28.  $^{13}\text{C}$  NMR (125 MHz,  $\text{DMSO-}d_6$ ) spectra of compound 4n

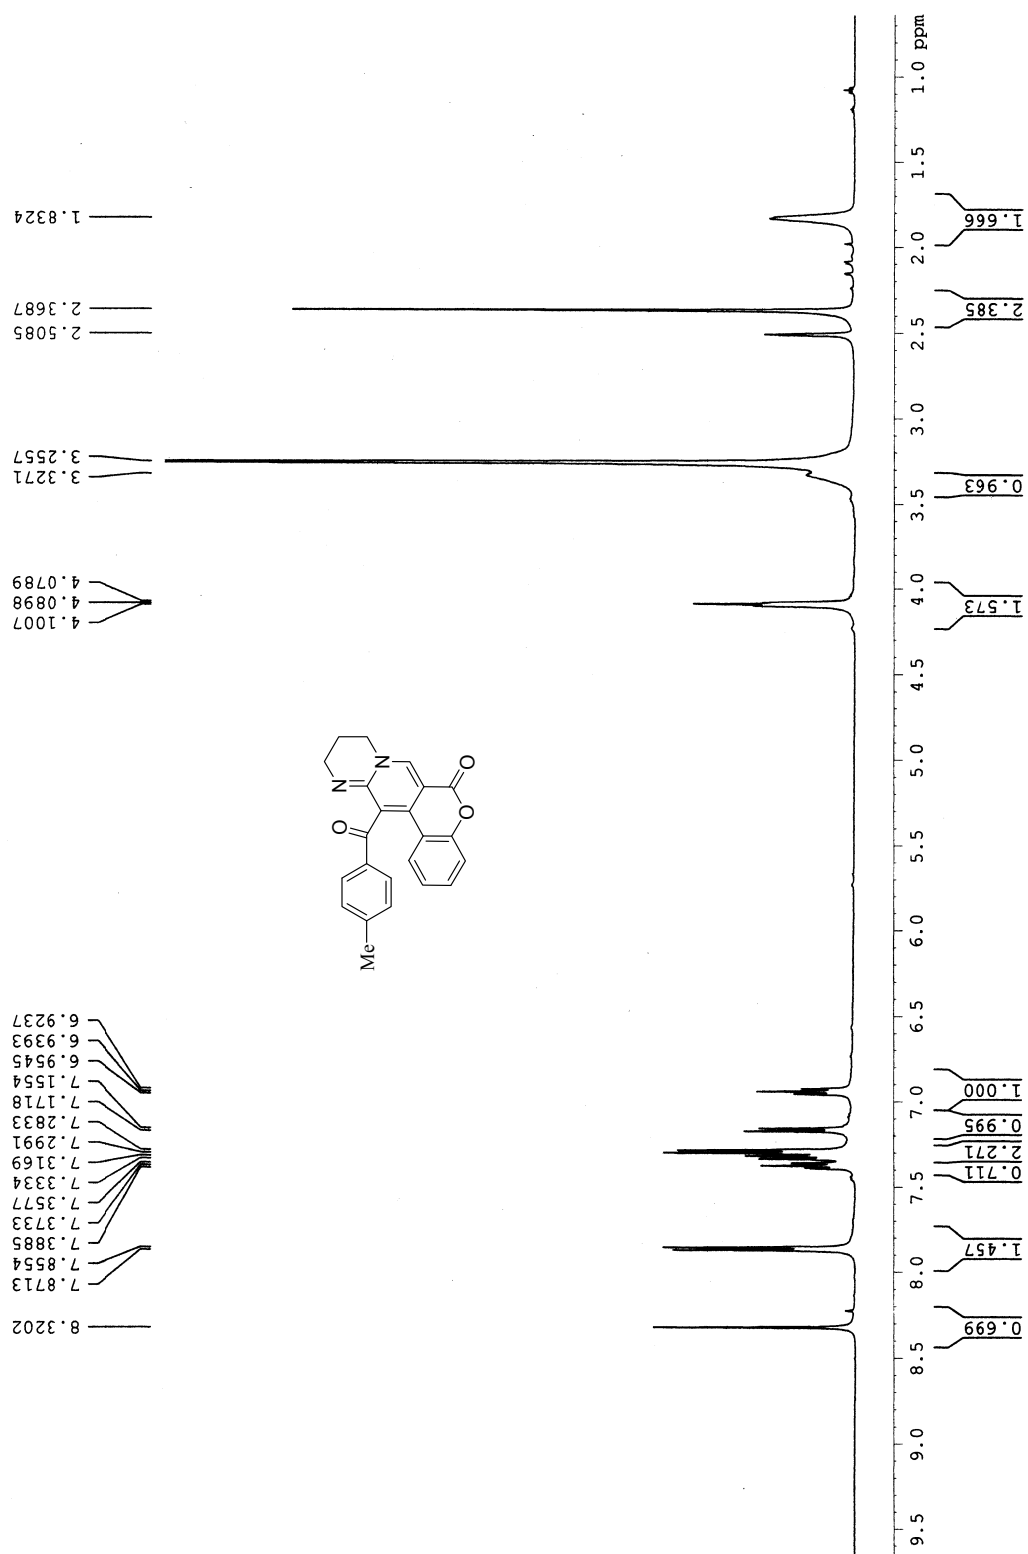

Figure 29. <sup>1</sup>H NMR (500 MHz, DMSO-*d*<sub>6</sub>) spectra of compound 40

DEPT135

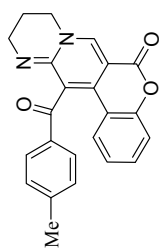

YUNNAN UNIVER. AV. DRX 500  
yufuchao YFC-285 in DMSO+cdcl3  
12101501

196.27

159.51

152.22

148.10

147.76

144.72

134.10

132.06

130.33

130.02

129.06

126.96

124.44

124.00

118.38

115.61

98.32

79.51

79.25

78.99

50.49

44.40

40.31

40.15

39.99

39.83

39.67

21.65

19.84

Figure 30. <sup>13</sup>C NMR (125 MHz, DMSO-*d*<sub>6</sub>) spectra of compound 40

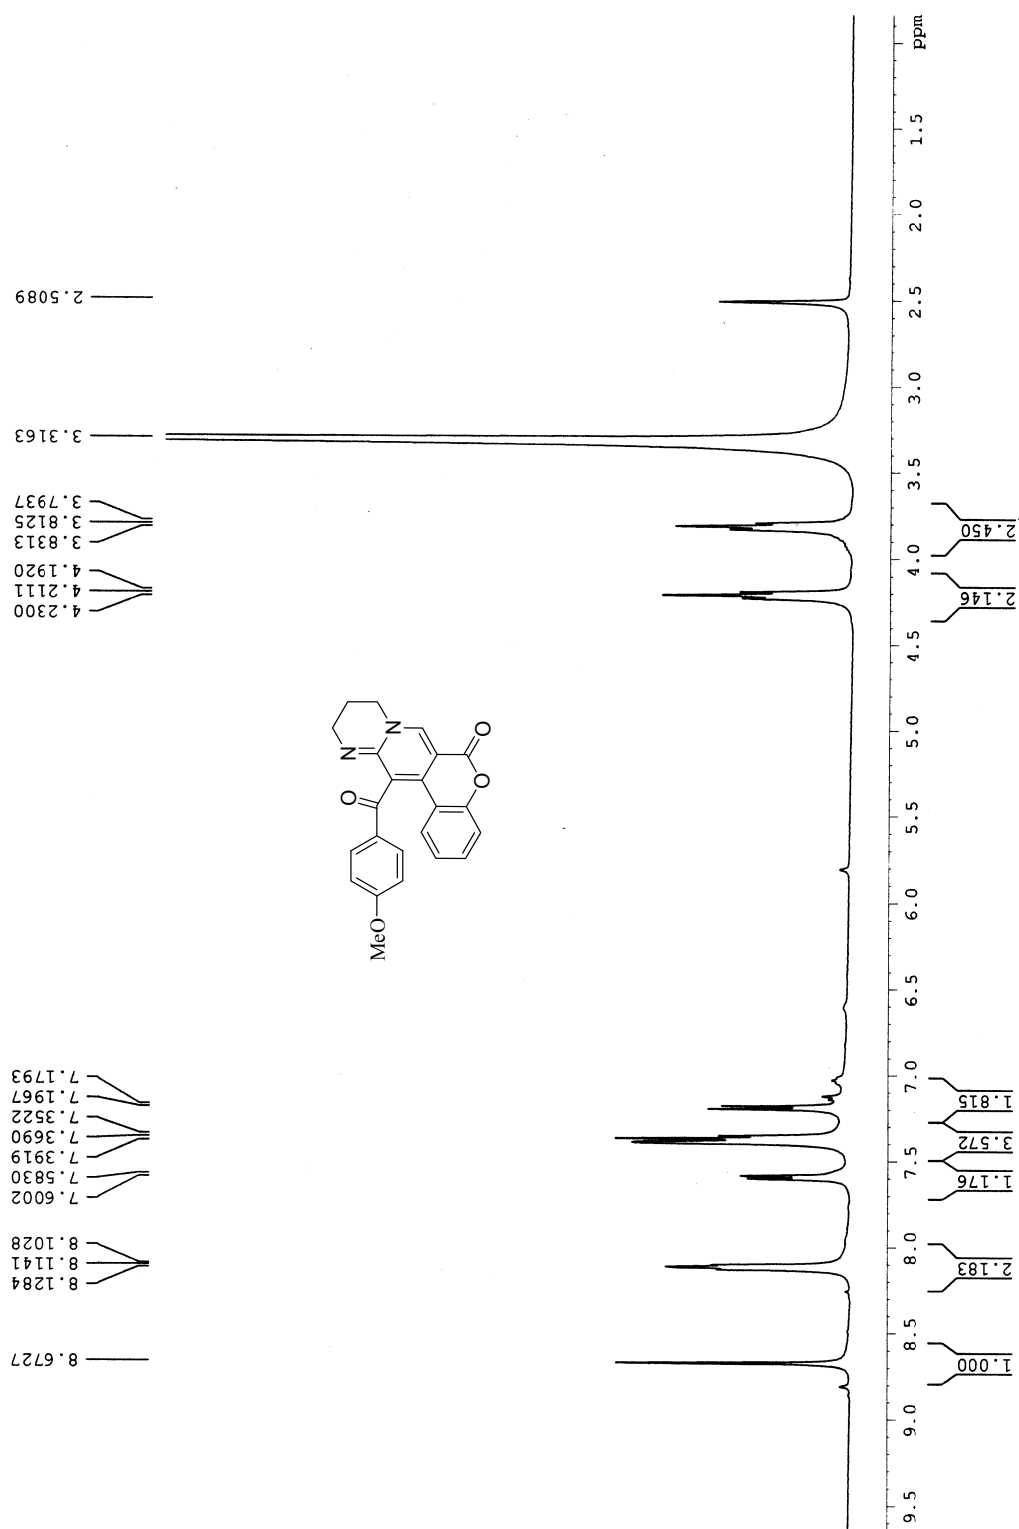

**Figure 31.** <sup>1</sup>H NMR (500 MHz, DMSO-*d*<sub>6</sub>) spectra of compound 4p

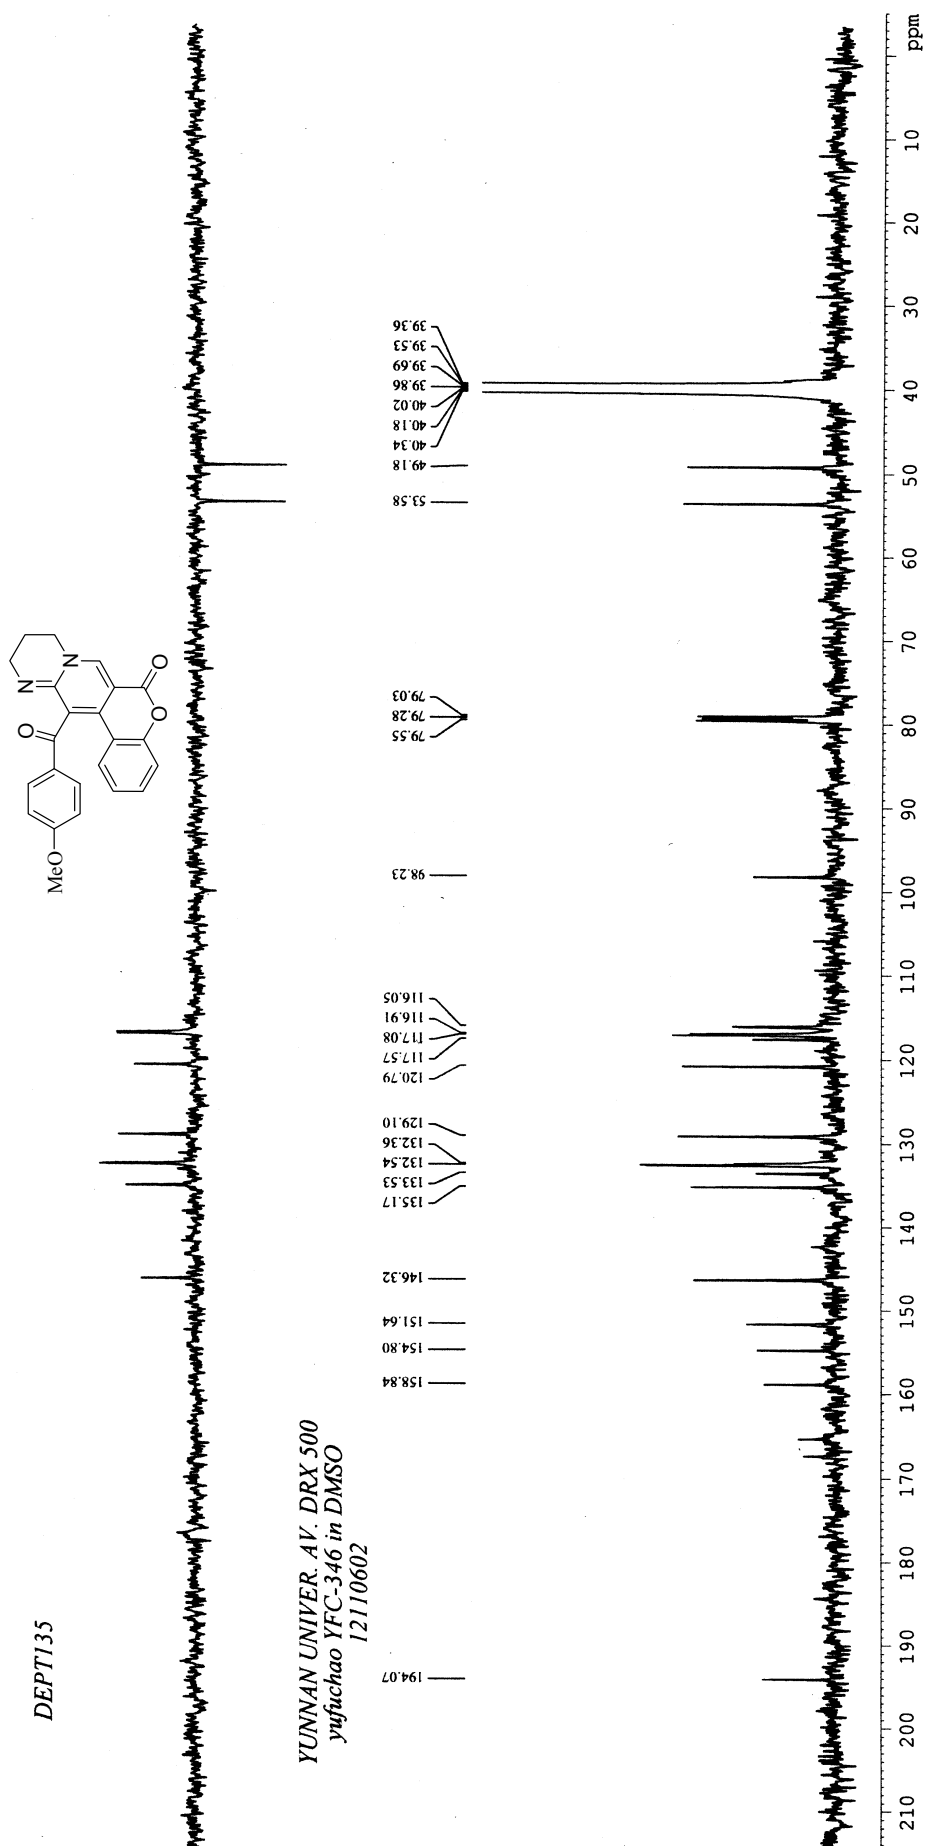

Figure 32.  $^{13}\text{C}$  NMR (125 MHz,  $\text{DMSO}-d_6$ ) spectra of compound 4p

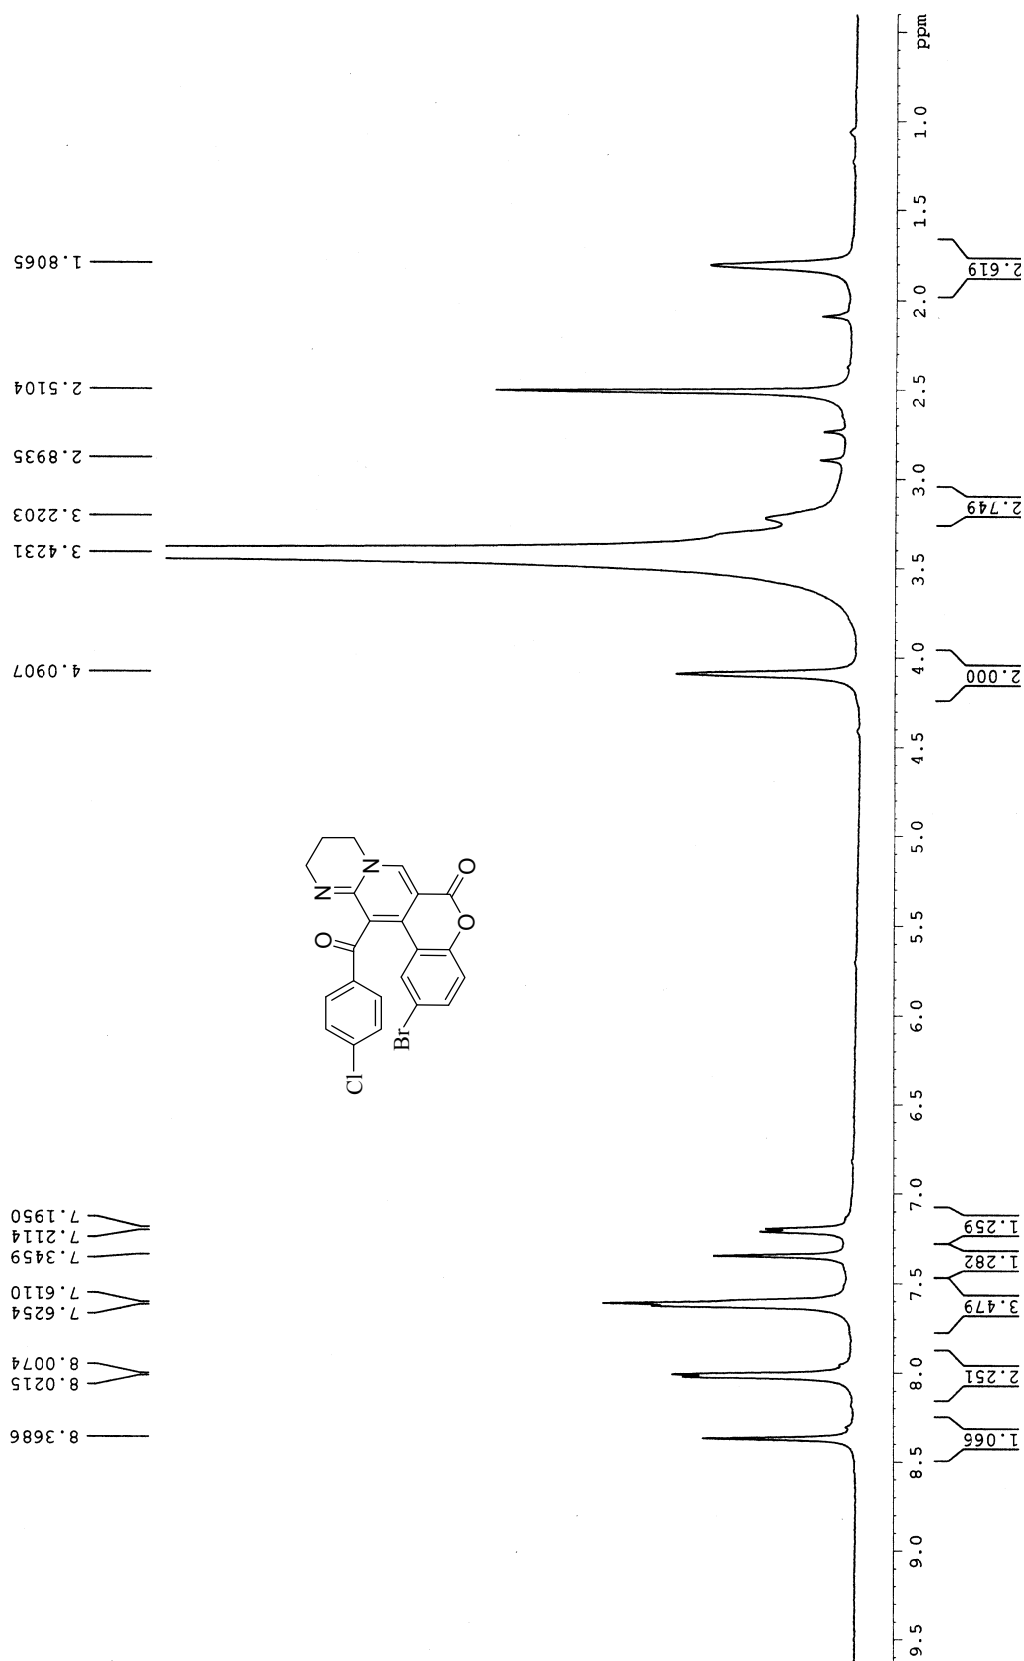

Figure 33. <sup>1</sup>H NMR (500 MHz, DMSO-*d*<sub>6</sub>) spectra of compound 4q



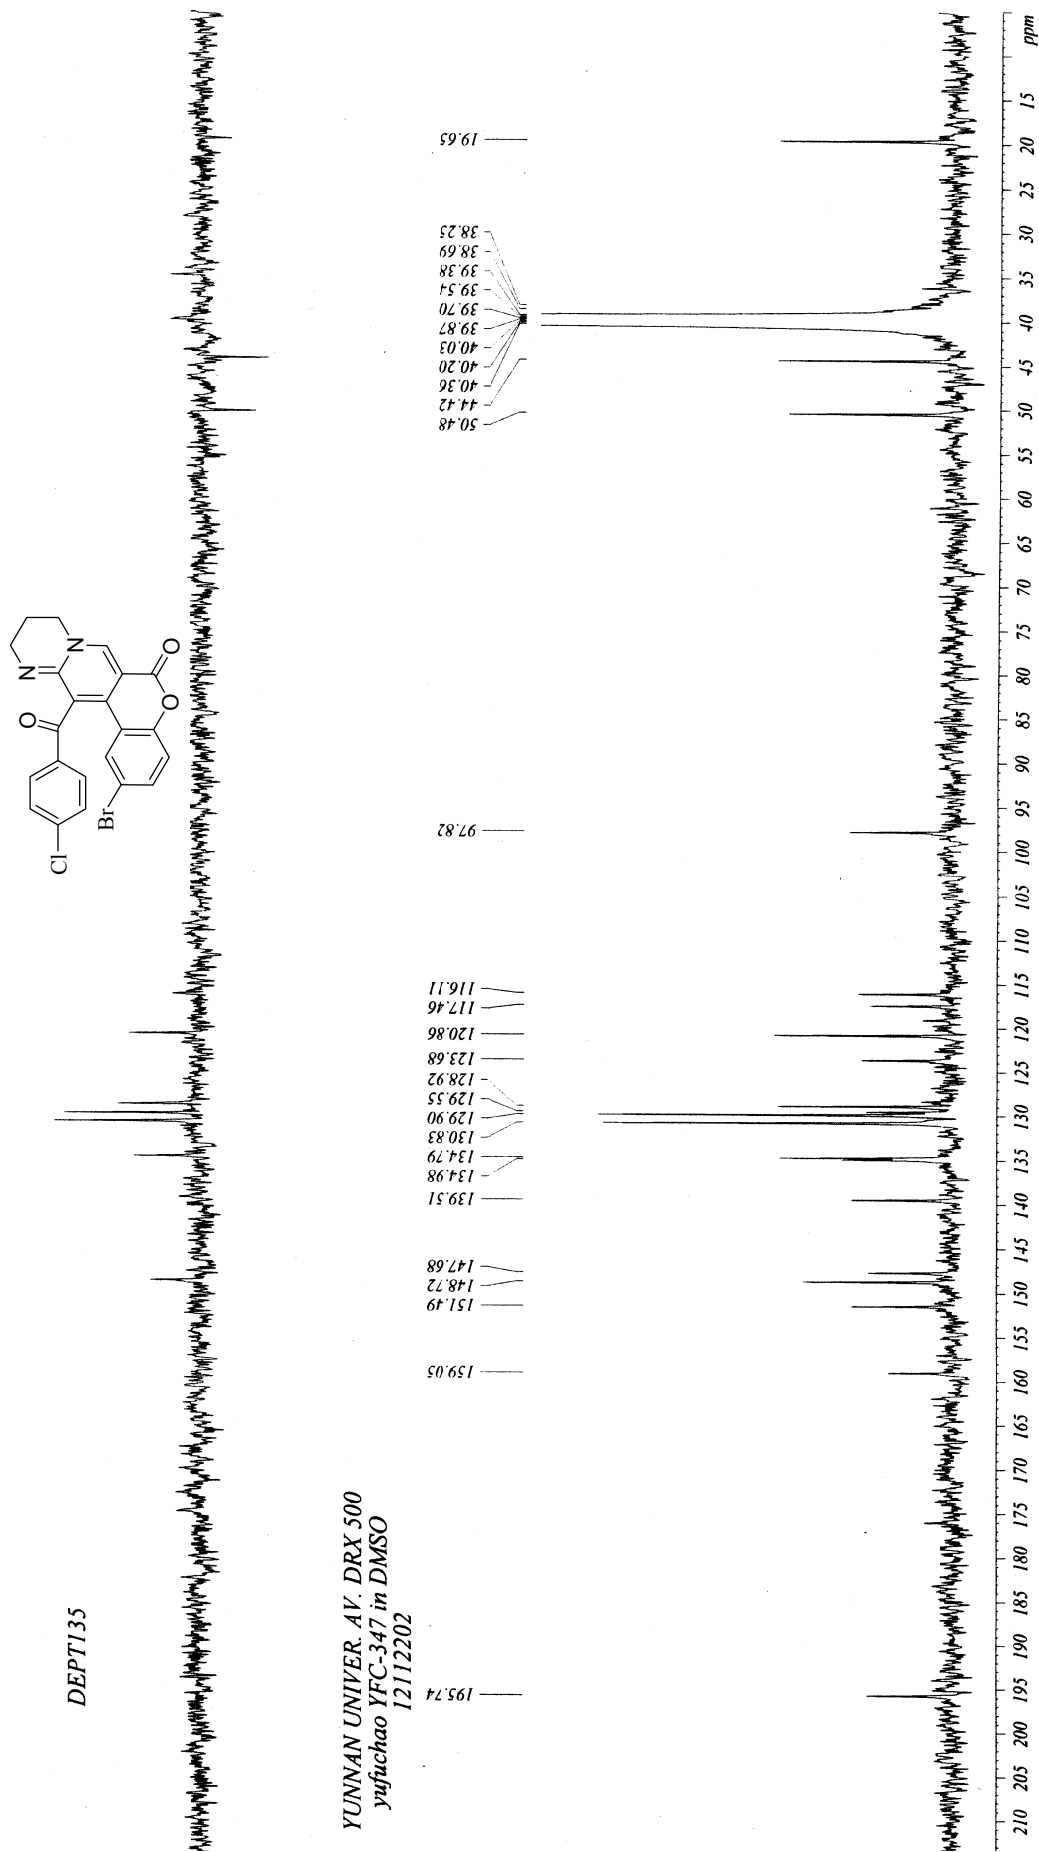

Figure 34.  $^{13}\text{C}$  NMR (125 MHz,  $\text{DMSO-}d_6$ ) spectra of compound 4q

## References

1. Z.-T. Huang, M.-X. Wang, *Synthesis*, 1992, **12**, 1273; (b) Z.-J. Li, D. Charles, *Synth. Commun.*, 2001, **31**, 527.
2. A. S. Al-Ayed, *Molecules*, 2011, **16**, 10292.
3. CCDC 917318 contain the supplementary crystallographic data for compound **4d**. These data can be obtained free of charge from The Cambridge Crystallographic Data Center via [www.ccdc.cam.ac.uk/data\\_request/cif](http://www.ccdc.cam.ac.uk/data_request/cif).
